# Supplementary material for: Astrocytic lactate shuttle disruption and the energy-starved lysosome in Alzheimer’s disease
Source: Research Square preprint supplement (doi:10.21203/rs.3.rs-10057949/v1), 2026-07-15
Supplement: Supplementary file 1 [file 529f17d2bd1289f62b6eb3b2.xlsx]

## Sheet: Astrocyte_179_genes
Astrocyte gene expression across pseudo-progression bins (mean log-normalized; 66 genes (subset of the 179-gene analysis panel; figure-relevant genes across 10 functional categories); n = 67,419 astrocytes; 84 donors)
Gene	Category	Bin_0.1	Bin_0.2	Bin_0.3	Bin_0.4	Bin_0.5	Bin_0.6	Bin_0.7	Bin_0.8	Bin_0.9
SLC16A3	ANLS_glycolytic	0.162756	0.0550195	0.062886	0.0721121	0.0403414	0.033678	0.0408571	0.033404	0.0220123
SLC16A1	ANLS_glycolytic	0.100999	0.0708817	0.0566771	0.0660213	0.0436018	0.0592177	0.0547669	0.0580586	0.0531967
SLC2A1	ANLS_glycolytic	0.365128	0.114834	0.143586	0.131752	0.122652	0.140763	0.111143	0.10924	0.130852
HK2	ANLS_glycolytic	0.216841	0.0636962	0.0647605	0.0892822	0.0706414	0.0769395	0.0295298	0.0345612	0.0343601
HK1	ANLS_glycolytic	0.53624	0.50751	0.451114	0.429767	0.618536	0.468042	0.477908	0.448047	0.521351
LDHA	ANLS_glycolytic	0.270522	0.100856	0.0986997	0.11633	0.12509	0.0863683	0.0928699	0.0708355	0.0688611
LDHB	ANLS_glycolytic	0.261878	0.351696	0.406113	0.379755	0.355839	0.373262	0.390958	0.406047	0.316768
PDK1	ANLS_glycolytic	0.416799	0.0921589	0.147269	0.146043	0.152307	0.129719	0.099892	0.0922146	0.106254
PKM	ANLS_glycolytic	0.496952	0.59161	0.534799	0.530015	0.611563	0.521924	0.51468	0.469222	0.496853
PFKFB3	ANLS_glycolytic	1.71253	1.15178	0.86204	1.09708	1.32739	0.980969	1.04326	0.925034	1.13002
ENO1	ANLS_glycolytic	0.748719	0.554763	0.599212	0.591437	0.544665	0.574283	0.54414	0.527822	0.605195
GAPDH	ANLS_glycolytic	1.09507	0.676881	0.56779	0.695727	0.534152	0.634639	0.536878	0.496781	0.519461
ATP6V1A	V_ATPase	0.390396	0.36904	0.415353	0.380868	0.349083	0.371148	0.406652	0.403203	0.350343
ATP6V1B2	V_ATPase	0.281676	0.123862	0.120658	0.126485	0.117851	0.117585	0.121796	0.113215	0.1035
ATP6V0D1	V_ATPase	0.0916739	0.113165	0.118315	0.0990153	0.120726	0.0996827	0.117818	0.11407	0.125337
ATP6V0A1	V_ATPase	0.732283	0.527341	0.48374	0.497614	0.480394	0.496813	0.50016	0.520307	0.506602
ATP6V1C1	V_ATPase	0.406296	0.295674	0.320494	0.298142	0.302555	0.307742	0.30074	0.303841	0.273701
ATP6V1E1	V_ATPase	0.240288	0.17899	0.177227	0.182755	0.174328	0.167621	0.173498	0.164457	0.156928
ATP6V1H	V_ATPase	0.914161	0.730233	0.752627	0.72815	0.733546	0.715453	0.73827	0.749712	0.667615
ATP6V0C	V_ATPase	0.176829	0.22539	0.190888	0.221826	0.197704	0.202223	0.211893	0.17938	0.202447
ATP6V0E1	V_ATPase	0.358905	0.294561	0.29789	0.296034	0.267959	0.285652	0.307318	0.308336	0.318142
ATP6V0B	V_ATPase	0.14863	0.126238	0.111873	0.128365	0.111927	0.128362	0.122834	0.112074	0.115334
LAMP1	Lysosomal	0.307621	0.222461	0.219548	0.224509	0.214635	0.213883	0.242573	0.234049	0.243948
LAMP2	Lysosomal	0.501612	0.440559	0.451068	0.427192	0.413954	0.468809	0.451409	0.445878	0.446993
CTSB	Lysosomal	0.174781	0.159643	0.152607	0.147751	0.165754	0.155693	0.173077	0.178978	0.181795
CTSD	Lysosomal	0.188209	0.331198	0.264803	0.285065	0.294167	0.333266	0.340452	0.336428	0.449095
CTSL	Lysosomal	0.141457	0.107695	0.0933973	0.132228	0.0925982	0.0854594	0.0946927	0.0825929	0.0555354
LIPA	Lysosomal	0.124632	0.20472	0.19684	0.18983	0.208368	0.234093	0.21466	0.212071	0.196524
GBA	Lysosomal	0.037448	0.0712958	0.0695593	0.0697174	0.0667252	0.0773774	0.063853	0.0677865	0.0660659
HEXA	Lysosomal	0.324564	0.316029	0.28997	0.287004	0.300264	0.297707	0.278841	0.300361	0.259665
TFRC	Iron	0.896745	0.298515	0.209208	0.319469	0.306076	0.275151	0.236902	0.220191	0.203138
FTH1	Iron	1.43425	1.4483	1.55123	1.65863	1.23415	1.37125	1.21368	1.17842	0.691044
FTL	Iron	0.97353	0.83361	0.887512	1.01752	0.749043	0.675211	0.871897	0.759286	0.578753
CP	Iron	0.0954052	0.197019	0.106525	0.198402	0.111441	0.0794852	0.0999203	0.0982488	0.236097
SLC40A1	Iron	0.00874623	0.0258458	0.0253015	0.0273905	0.0214886	0.0211125	0.0278621	0.0272105	0.0180053
HMOX1	Iron	0.361875	0.0113072	0.00968961	0.0106351	0.0113841	0.00823191	0.0189005	0.015955	0.0201045
SLC11A2	Iron	0.323032	0.288129	0.230358	0.261042	0.26178	0.267827	0.24505	0.239222	0.224744
SLC9A6	pH_regulatory	0.130756	0.158372	0.154677	0.161036	0.153637	0.185201	0.173838	0.172759	0.156219
LAMTOR1	Ragulator_mTOR	0.0625808	0.0996496	0.10109	0.0987802	0.0938961	0.081126	0.0863713	0.0909123	0.0670875
LAMTOR2	Ragulator_mTOR	0.0309244	0.0403588	0.0392959	0.0417742	0.0325272	0.0368138	0.031219	0.0318697	0.0268204
LAMTOR3	Ragulator_mTOR	0.0908696	0.0592973	0.0670627	0.0603858	0.057844	0.0635478	0.0627814	0.0684208	0.052713
LAMTOR4	Ragulator_mTOR	0.0759066	0.0811016	0.0809451	0.0934752	0.0750523	0.0827638	0.0753239	0.0772539	0.0804369
LAMTOR5	Ragulator_mTOR	0.0980321	0.0664675	0.0604073	0.0687475	0.0478156	0.0572417	0.0598803	0.0593141	0.0474012
MTOR	Ragulator_mTOR	0.340272	0.376587	0.398448	0.376186	0.376737	0.382762	0.383026	0.398747	0.377878
TSC1	Ragulator_mTOR	0.432937	0.370787	0.41467	0.405823	0.33973	0.391839	0.375119	0.393987	0.322434
TSC2	Ragulator_mTOR	0.261759	0.310442	0.274406	0.298888	0.335766	0.312653	0.275216	0.274478	0.288032
RPTOR	Ragulator_mTOR	0.776577	0.732696	0.721965	0.651147	0.688136	0.721044	0.689401	0.727779	0.715124
MAP1LC3B	Autophagy	0.346656	0.117045	0.12815	0.148631	0.122385	0.12631	0.137771	0.138615	0.13069
SQSTM1	Autophagy	1.46567	0.50312	0.574347	0.539625	0.428317	0.471994	0.586186	0.553239	0.580135
ATG5	Autophagy	0.347565	0.317145	0.330779	0.329279	0.305755	0.29202	0.341418	0.332743	0.297188
ATG7	Autophagy	1.05345	1.26071	1.33867	1.24002	1.37289	1.32965	1.3288	1.37179	1.39314
BECN1	Autophagy	0.099548	0.122246	0.115335	0.109527	0.126055	0.111687	0.117357	0.114353	0.0995862
ULK1	Autophagy	0.296333	0.232143	0.230009	0.220067	0.22343	0.242541	0.232758	0.22549	0.274179
APOE	Cholesterol	0.660206	0.957801	0.89115	1.10688	0.846028	1.04299	0.917193	0.816383	0.669213
ABCA1	Cholesterol	1.04938	0.806311	1.07447	0.926817	1.01981	0.823325	0.902665	0.942773	0.872267
SREBF2	Cholesterol	0.988465	0.723184	0.676009	0.708577	0.656605	0.767593	0.753382	0.709537	0.771528
HMGCR	Cholesterol	0.176793	0.119809	0.0929412	0.113199	0.0961897	0.11218	0.111072	0.097043	0.0785475
LDLR	Cholesterol	0.707929	0.286597	0.135287	0.193852	0.228404	0.137896	0.19554	0.152189	0.215584
NPC1	Cholesterol	0.665944	0.35505	0.348155	0.365472	0.376333	0.33514	0.359234	0.343623	0.368141
NPC2	Cholesterol	0.0805445	0.0816663	0.082953	0.0980097	0.0764849	0.0957696	0.0819275	0.0845799	0.0724924
VDAC1	ER_Mito_Contact	0.316232	0.161599	0.169842	0.16575	0.166251	0.146588	0.154205	0.14533	0.13037
VDAC2	ER_Mito_Contact	0.195539	0.12654	0.133775	0.154308	0.125314	0.131513	0.133253	0.119212	0.101932
PTGDS	Signaling	1.42809	1.87815	1.87626	1.86309	1.90202	2.02191	1.75846	1.74852	1.51342
LCN2	Signaling	0	0	0	0	0.000152134	9.31608e-05	0	3.45368e-05	0.000148253
STAT3	Signaling	1.27404	0.860568	0.696965	0.772062	1.02653	0.746587	0.874894	0.801903	1.02683
SOX9	Signaling	0.339894	0.584462	0.556544	0.544179	0.567348	0.580019	0.56685	0.613855	0.584027

## Sheet: Fig1_data
Figure 1. Energetic dissociation between ANLS and V-ATPase
Panel A: % change Early → Late
Gene	Category	Early mean (Bins 0.2-0.4)	Late mean (Bins 0.6-0.8)	% Change
SLC16A3	ANLS	0.0633	0.036	-43.2
HK2	ANLS	0.0726	0.047	-35.23
LDHA	ANLS	0.1053	0.0834	-20.83
PDK1	ANLS	0.1285	0.1073	-16.51
SLC16A1	ANLS	0.0645	0.0573	-11.13
SLC2A1	ANLS	0.1301	0.1204	-7.44
PKM	ANLS	0.5521	0.5019	-9.09
PFKFB3	ANLS	1.037	0.9831	-5.2
VATpase	V-ATPase	0.2978	0.2954	-0.79
LAMP1	Lysosomal	0.2222	0.2302	3.6
CTSB	Lysosomal	0.1533	0.1692	10.38
CTSD	Lysosomal	0.2937	0.3367	14.65
Panel B: Normalized trajectories (Bin 0.2 = 1.0)
bin	MCT4_norm	ANLS_norm	VATpase_norm	n_cells
0.2	1	1	1	1
0.3	1.143	1.0432	1.0015	1
0.4	1.3107	1.0961	0.9915	1
0.5	0.7332	1.0167	0.957	1
0.6	0.6121	0.9992	0.9691	1
0.7	0.7426	0.903	1.0055	1
0.8	0.6071	0.831	0.9947	1
0.9	0.4001	0.8825	0.9449	1
Panel C: Linear regression slopes (95% CI)
Marker	Slope (β)	95% CI lower	95% CI upper	SE	p	Significance
MCT4	-1.036	-1.724	-0.348	0.281	0.0109	*
ANLS	-0.295	-0.513	-0.077	0.089	0.0162	*
V-ATPase	-0.044	-0.126	0.039	0.034	0.244	ns
Panel D: Energy/Demand ratio trajectory
bin	E/D Ratio
0.2	0.9286
0.3	0.8597
0.4	0.861
0.5	1.0654
0.6	0.8826
0.7	0.834
0.8	0.7784
0.9	0.9015

## Sheet: Fig2_data
Figure 2. Cross-cellular ANLS → neuron coupling
Panel A-D: Cross-cellular bin-level values (n = 8 bins)
bin	Astro_MCT4	Astro_ANLS	Neuron_VATPase	Neuron_LDHB	Neuron_LAMP1
0.2	0.055	0.0955	0.4924	0.2288	0.2089
0.3	0.0629	0.0997	0.4963	0.2444	0.2142
0.4	0.0721	0.1047	0.5109	0.2581	0.2225
0.5	0.0403	0.0971	0.4792	0.2412	0.1991
0.6	0.0337	0.0954	0.4557	0.2273	0.1958
0.7	0.0409	0.0863	0.4921	0.2523	0.2145
0.8	0.0334	0.0794	0.4713	0.2357	0.2011
0.9	0.022	0.0843	0.4633	0.2313	0.1928
Panel F: Astrocyte vs Neuron V-ATPase % change
Cell	Early mean	Late mean	% Change
Astrocyte	0.2978	0.2954	-0.8
Neuron	0.4999	0.473	-5.4

## Sheet: Fig3_data
Figure 3. Astrocyte subtype consistency and network architecture
Panel A-B: Astrocyte subtype trajectories
subtype	bin	n_cells	SLC2A1	SLC16A1	SLC16A3	LDHA	LDHB	HK1	HK2	PKM	PFKFB3	PDK1	ATP6V1A	ATP6V1B2	ATP6V0D1	ATP6V0A1	LAMP1	LAMP2	CTSB	CTSD	SLC9A6	TFRC	FTH1	FTL	VDAC1	PTGDS	LCN2	GFAP	AQP4	SOX9	ANLS
Astro_1	0.2	369	0.126882	0.0511271	0.0425064	0.0900041	0.370235	0.556042	0.0175411	0.643705	1.10418	0.0735409	0.382999	0.109784	0.119199	0.518396	0.203921	0.371947	0.133522	0.288832	0.136814	0.205695	1.21962	0.68585	0.179721	1.82989	0	2.03583	1.91193	0.616789	0.0893379
Astro_1	0.3	550	0.14267	0.043375	0.0442343	0.103485	0.440654	0.420703	0.0617432	0.534283	0.896907	0.12827	0.420859	0.142352	0.152229	0.446998	0.215763	0.516781	0.132641	0.220294	0.134748	0.197431	1.44214	0.605112	0.183562	1.75081	0	1.32708	1.84292	0.57658	0.0965098
Astro_1	0.4	599	0.10856	0.0661162	0.0586959	0.114603	0.392266	0.42578	0.0663542	0.519779	1.13324	0.140272	0.404266	0.0992662	0.0991247	0.492901	0.242079	0.406027	0.136569	0.256955	0.1928	0.302299	1.52358	0.759786	0.184906	1.79856	0	2.07569	1.88606	0.519525	0.0964262
Astro_1	0.5	445	0.0893113	0.0254506	0.0276083	0.140799	0.350396	0.588522	0.0827622	0.670615	1.34958	0.159525	0.37097	0.133707	0.110895	0.478393	0.16713	0.373546	0.138779	0.262784	0.162049	0.258421	1.0546	0.486042	0.140712	1.90246	0	2.46481	1.83392	0.512987	0.0851871
Astro_1	0.6	394	0.116274	0.0552372	0.0221223	0.0665315	0.329762	0.480976	0.069943	0.531034	1.05057	0.139739	0.348574	0.128925	0.104247	0.450744	0.197712	0.401896	0.152283	0.274	0.217107	0.184712	1.09593	0.409456	0.160547	2.02628	0	1.84484	1.74472	0.550205	0.0793475
Astro_1	0.7	839	0.124897	0.0561165	0.0219211	0.0909621	0.354453	0.497034	0.033507	0.544867	1.16709	0.114691	0.438028	0.122854	0.116096	0.564681	0.224988	0.438377	0.165931	0.276526	0.166107	0.188235	1.14698	0.673161	0.166303	1.72748	0	1.8549	1.73219	0.47797	0.0906585
Astro_1	0.8	844	0.0918676	0.0600379	0.0218478	0.0792688	0.392483	0.436304	0.0310906	0.493769	0.981736	0.0938694	0.415958	0.111536	0.132282	0.482209	0.237066	0.44233	0.149891	0.284923	0.18081	0.191454	1.08397	0.505318	0.140375	1.78818	0.000577304	1.79652	1.88408	0.553152	0.0770581
Astro_1	0.9	1289	0.082875	0.0419683	0.0188829	0.0630632	0.265652	0.503002	0.0226239	0.488997	1.17275	0.100277	0.341077	0.0972834	0.111837	0.539209	0.211646	0.442117	0.144759	0.305201	0.147878	0.174294	0.647174	0.414962	0.12772	1.52629	0.000945301	2.34663	1.61793	0.560462	0.0626355
Astro_2	0.1	45	0.167569	0.0577122	0.199926	0.0693407	0.311285	0.577463	0.0235182	0.556423	1.73783	0.176372	0.426287	0.143671	0.0622054	0.687313	0.30772	0.404847	0.206215	0.133716	0.0804614	0.604038	1.40108	0.877849	0.237456	1.35869	0	1.95331	1.46296	0.479756	0.0982072
Astro_2	0.2	2397	0.10233	0.0458532	0.0597001	0.0793762	0.41327	0.510742	0.013316	0.560854	0.90792	0.079837	0.40292	0.113883	0.120081	0.495015	0.232765	0.440968	0.161451	0.329404	0.175891	0.311536	1.64034	1.01974	0.162592	1.88335	0	1.40629	1.70721	0.622908	0.0758533
Astro_2	0.3	5099	0.140249	0.0466768	0.071024	0.0934505	0.423778	0.455474	0.0431574	0.52016	0.775743	0.154075	0.426984	0.11206	0.116518	0.472689	0.229013	0.433255	0.153167	0.265997	0.163325	0.222704	1.65876	0.971173	0.165955	1.88462	0	0.947696	1.61432	0.580086	0.0934587
Astro_2	0.4	3027	0.110462	0.0576243	0.0787228	0.0946322	0.414903	0.409639	0.027283	0.46916	0.899416	0.120723	0.39007	0.121811	0.104905	0.470638	0.231248	0.421256	0.152642	0.286133	0.165393	0.309178	1.8257	1.20589	0.159194	1.81953	0	1.54014	1.68517	0.548759	0.087573
Astro_2	0.5	2803	0.112265	0.0369496	0.0333719	0.109883	0.372267	0.622979	0.0420967	0.578393	1.24314	0.11027	0.349496	0.111193	0.126314	0.463983	0.214023	0.40543	0.158858	0.281486	0.160362	0.317647	1.2869	0.72092	0.154012	1.88963	0.000254606	2.13611	1.63319	0.549996	0.0863657
Astro_2	0.6	3596	0.111715	0.0476845	0.0372137	0.0721077	0.405567	0.457391	0.0264529	0.498048	0.85554	0.103954	0.389594	0.109443	0.100183	0.480062	0.226769	0.472434	0.1575	0.348668	0.200554	0.257651	1.5108	0.783069	0.145476	2.01323	0.00013798	1.23024	1.63625	0.610819	0.0771692
Astro_2	0.7	8079	0.113144	0.0459696	0.0436447	0.0793052	0.422311	0.478405	0.0143487	0.495149	0.944883	0.0922432	0.416496	0.120452	0.118675	0.479419	0.247038	0.451678	0.175873	0.347463	0.18388	0.248712	1.24214	0.940185	0.150928	1.74142	0	1.2108	1.55888	0.595831	0.079473
Astro_2	0.8	10494	0.105195	0.049581	0.031893	0.0616966	0.433751	0.450298	0.0135847	0.457103	0.840343	0.0828978	0.420241	0.111735	0.11789	0.512878	0.244583	0.448155	0.184437	0.351412	0.178047	0.226156	1.20206	0.809538	0.145313	1.73982	0	1.26206	1.68486	0.65349	0.0721574
Astro_2	0.9	9379	0.130467	0.0412078	0.0202532	0.0511213	0.336468	0.517881	0.0111568	0.472858	1.01392	0.0765895	0.357232	0.0961538	0.131924	0.484936	0.254316	0.446461	0.190473	0.500812	0.165111	0.19672	0.62237	0.571484	0.120182	1.49105	8.76491e-05	1.72103	1.4708	0.607625	0.0742653
Astro_3	0.1	130	0.891774	0.234952	0.154357	0.320522	0.378452	0.524311	0.623656	0.516954	1.33867	0.817438	0.578307	0.520706	0.0816351	1.01493	0.350254	0.717109	0.140637	0.203561	0.151516	0.911076	1.62678	0.805636	0.374202	1.78698	0	0.864228	0.89921	0.200088	0.482416
Astro_3	0.2	1314	0.1617	0.111579	0.0367762	0.136249	0.251432	0.534858	0.175994	0.685873	1.6725	0.118062	0.296948	0.146483	0.100027	0.572865	0.198102	0.471085	0.164078	0.351921	0.141737	0.321977	1.22809	0.598789	0.16128	1.92367	0	2.54045	2.00752	0.463577	0.136509
Astro_3	0.3	1120	0.163337	0.0993701	0.0372025	0.121065	0.335444	0.440377	0.155299	0.625791	1.26478	0.117198	0.368715	0.137727	0.107627	0.514073	0.173822	0.499317	0.15349	0.272361	0.137361	0.165286	1.30685	0.800321	0.188996	1.96969	0	2.10081	1.91809	0.438366	0.127924
Astro_3	0.4	1163	0.215871	0.0858813	0.0620928	0.176036	0.296329	0.488182	0.272036	0.730876	1.61554	0.204224	0.352432	0.152811	0.084263	0.545447	0.181559	0.448656	0.1325	0.296268	0.135649	0.366258	1.33302	0.716169	0.173645	2.0189	0	2.57222	1.96951	0.53709	0.159263
Astro_3	0.5	491	0.164786	0.0619968	0.0183193	0.136803	0.229727	0.503404	0.201562	0.698898	1.70505	0.167075	0.295333	0.133	0.0908804	0.540847	0.172077	0.43822	0.15305	0.249083	0.129403	0.2149	0.998134	0.539902	0.163838	1.84876	0	2.83033	1.95716	0.528089	0.121195
Astro_3	0.6	835	0.247532	0.0775711	0.0288864	0.146643	0.282641	0.502556	0.283857	0.678793	1.48334	0.186874	0.295987	0.137827	0.0915732	0.562748	0.151616	0.469458	0.121562	0.293148	0.119482	0.341447	1.13041	0.503322	0.151001	2.11488	0	2.18805	1.83477	0.442924	0.157248
Astro_3	0.7	1268	0.124912	0.0740414	0.0271818	0.132162	0.254538	0.468972	0.127516	0.668079	1.48463	0.139808	0.328672	0.13171	0.101911	0.57115	0.182829	0.426572	0.14805	0.298506	0.12941	0.173108	1.01564	0.609268	0.154019	1.82932	0	2.32218	1.61993	0.400361	0.110372
Astro_3	0.8	1591	0.161932	0.0963066	0.0454587	0.122239	0.29181	0.45353	0.176772	0.583935	1.43231	0.15806	0.315709	0.131764	0.0882349	0.55186	0.185765	0.426567	0.158461	0.285844	0.150516	0.190465	1.19032	0.676866	0.151599	1.84116	0	2.3143	1.9186	0.391108	0.126826
Astro_3	0.9	1527	0.184622	0.099508	0.0276212	0.159581	0.259896	0.580452	0.183914	0.636091	1.72676	0.256468	0.305058	0.143322	0.107052	0.593264	0.198789	0.44201	0.164636	0.294709	0.12499	0.184877	1.01878	0.701482	0.196712	1.76434	0	2.41744	1.70479	0.449555	0.147903
Astro_4	0.2	96	0.0277743	0.178513	0.00792786	0.0721506	0.193036	0.272068	0.0932504	0.359941	1.11108	0.0838363	0.315267	0.135597	0.090999	0.700342	0.195872	0.369247	0.160459	0.224655	0.176815	0.133824	0.784766	0.350882	0.0819281	1.7282	0	2.77818	1.84971	0.483198	0.0928125
Astro_4	0.3	59	0.0197971	0.119453	0.00996309	0.0375713	0.279105	0.387843	0.0615868	0.308852	0.755092	0.0371686	0.234293	0.181791	0.0841397	0.790759	0.276168	0.322648	0.0931608	0.187548	0.0692284	0.105302	0.68071	0.528994	0.106211	1.75744	0	2.50213	1.82744	0.425949	0.0589404
Astro_4	0.4	84	0.0903252	0.110164	0.0159815	0.0658949	0.230726	0.325635	0.0708366	0.291167	1.12356	0.0504935	0.244061	0.149673	0.0837036	0.669766	0.211799	0.469225	0.170447	0.17173	0.182563	0.23869	0.871191	0.468084	0.0980646	1.67282	0	2.68983	1.86624	0.666119	0.0887948
Astro_4	0.5	19	0.0232596	0.0593379	0.0633441	0.0648672	0.283977	0.503594	0.201759	0.48373	1.58385	0.105254	0.26556	0.217483	0.0910159	0.42039	0.361001	0.473364	0.194152	0.166956	0.19722	0.281582	0.280903	0.459885	0.0896422	2.05796	0	3.36884	1.93698	0.72983	0.0491549
Astro_4	0.6	71	0.0208735	0.316153	0.0181392	0.0318772	0.161531	0.350698	0.115091	0.316581	1.04161	0.076476	0.329548	0.147646	0.145229	0.540378	0.191605	0.275231	0.204782	0.285377	0.159214	0.308931	0.648714	0.320326	0.0701794	1.90125	0	2.46694	1.79551	0.680603	0.122968
Astro_4	0.7	125	0.0122596	0.194315	0.040441	0.0664994	0.250915	0.40619	0.0606413	0.364844	0.980084	0.0914551	0.342791	0.101493	0.0866765	0.574852	0.233731	0.423667	0.162113	0.217841	0.0865662	0.165048	0.658295	0.502268	0.182857	1.91123	0	2.46218	1.8257	0.71073	0.0910247
Astro_4	0.8	95	0.093816	0.109353	0.0398904	0.0565513	0.233333	0.415046	0.119274	0.392555	1.02992	0.0647383	0.24349	0.122196	0.063378	0.609819	0.172233	0.530713	0.165314	0.266459	0.148587	0.142285	0.720157	0.35047	0.109918	1.84974	0	2.75288	1.85218	0.815823	0.0865734
Astro_4	0.9	299	0.0685032	0.185701	0.014736	0.0594791	0.237623	0.310389	0.0597431	0.314339	1.19179	0.0899068	0.351313	0.112461	0.0755898	0.619919	0.235228	0.447911	0.189904	0.274956	0.10557	0.218857	0.672264	0.723621	0.115986	1.26669	0	2.86672	1.92502	0.762981	0.104561
Astro_5	0.1	17	0.121373	0.124921	0.159012	0.205927	0.191546	0.404685	0	0.551011	2.12618	0.0698723	0.0499264	0.123831	0.113974	0.554605	0.396781	0.742354	0.248456	0.247995	0.189713	0.643111	0.872727	0.930251	0.224144	1.55551	0	3.22812	2.0483	0.67217	0.15074
Astro_5	0.2	430	0.0533255	0.0928123	0.0801176	0.0826041	0.315565	0.422871	0.046178	0.445838	0.921981	0.104314	0.384869	0.122394	0.108508	0.571286	0.245122	0.408271	0.143474	0.314618	0.129855	0.231949	1.14947	0.542241	0.153263	1.75772	0	2.23492	2.11633	0.674019	0.0762473
Astro_5	0.3	374	0.113631	0.0710982	0.0459551	0.0854307	0.347904	0.462851	0.0690634	0.440928	0.74982	0.13984	0.40092	0.127193	0.134336	0.539074	0.232585	0.475381	0.181211	0.265634	0.13074	0.170903	1.01224	0.418521	0.132246	1.64853	0	1.80451	1.80532	0.549165	0.0900534
Astro_5	0.4	250	0.0770094	0.0674338	0.0744072	0.0886112	0.287267	0.379057	0.0360661	0.413642	0.913065	0.11418	0.384644	0.109282	0.0838376	0.488864	0.245295	0.404649	0.174569	0.261465	0.137805	0.228415	1.21006	0.508109	0.142731	1.75576	0	2.45021	2.07707	0.588751	0.0776848
Astro_5	0.5	200	0.0712515	0.0730191	0.0490833	0.137111	0.284964	0.630478	0.0653644	0.512198	1.37599	0.198765	0.292495	0.113312	0.11051	0.516362	0.205987	0.414248	0.156203	0.28522	0.16975	0.242487	0.876006	0.371378	0.179058	1.82406	0	2.84493	1.80693	0.703064	0.0937939
Astro_5	0.6	319	0.116145	0.0816654	0.0123704	0.0573928	0.329832	0.410536	0.0597542	0.364674	0.851048	0.0949841	0.391153	0.141782	0.0961622	0.572057	0.238893	0.509902	0.196642	0.295789	0.154124	0.307556	0.90425	0.274572	0.135786	1.86534	0	1.75449	1.86572	0.585777	0.0850677
Astro_5	0.7	670	0.0540494	0.0727704	0.0421348	0.067559	0.302965	0.408484	0.0168632	0.360959	0.880317	0.0662789	0.392745	0.134935	0.109251	0.548666	0.224393	0.446755	0.154747	0.293943	0.166161	0.182415	0.829366	0.406261	0.127339	1.67862	0	1.91678	1.89279	0.61684	0.064793
Astro_5	0.8	704	0.0637166	0.0897722	0.0253572	0.0631023	0.282064	0.399052	0.0257382	0.326827	0.75571	0.077695	0.360978	0.103419	0.102155	0.588903	0.202868	0.436568	0.181888	0.305611	0.157208	0.180374	0.789037	0.391906	0.13371	1.53687	0	1.98244	1.93087	0.587873	0.0721971
Astro_5	0.9	639	0.0726606	0.0771003	0.0234878	0.074356	0.28391	0.369751	0.0248151	0.404694	1.05854	0.0872052	0.329231	0.130133	0.117213	0.541956	0.224389	0.45297	0.17265	0.333734	0.160314	0.273644	0.611571	0.394217	0.109582	1.35064	0	2.47339	1.80668	0.615797	0.0747056
Astro_6-SEAAD	0.1	226	0.131647	0.0330258	0.165475	0.291964	0.194655	0.53814	0.0424697	0.459982	1.90322	0.269175	0.30791	0.183317	0.101776	0.581858	0.273779	0.373784	0.190354	0.175981	0.123122	0.953904	1.39225	1.10001	0.306779	1.22697	0	2.30259	1.49481	0.356598	0.152212
Astro_6-SEAAD	0.2	181	0.107921	0.0379757	0.116338	0.209082	0.396348	0.493182	0.0356766	0.67756	1.2656	0.0807852	0.406183	0.117753	0.127466	0.447025	0.260906	0.467927	0.194738	0.386771	0.149034	0.390459	2.03193	1.32281	0.175885	1.9429	0	1.92936	2.03054	0.727958	0.118326
Astro_6-SEAAD	0.3	97	0.286923	0.0710545	0.134878	0.177601	0.399325	0.511538	0.157436	0.756024	1.04829	0.340025	0.476974	0.190143	0.102937	0.522655	0.186695	0.442128	0.152009	0.410911	0.157274	0.284551	1.94656	1.124	0.258866	2.01921	0	1.60109	1.87521	0.677835	0.178526
Astro_6-SEAAD	0.4	237	0.12193	0.0584369	0.0882287	0.151957	0.458982	0.500677	0.104962	0.554876	1.17079	0.265989	0.388246	0.135731	0.117339	0.567559	0.287369	0.460062	0.152057	0.352562	0.166548	0.389381	2.21612	1.47392	0.210594	1.99855	0	2.15046	1.96211	0.492556	0.110775
Astro_6-SEAAD	0.5	733	0.170989	0.059303	0.086493	0.164141	0.402002	0.696609	0.0827824	0.674477	1.3632	0.287327	0.387829	0.122192	0.128878	0.495609	0.272891	0.453204	0.218878	0.397649	0.133522	0.369821	1.42196	1.26688	0.228666	2.00208	0	2.22258	1.9192	0.651763	0.131478
Astro_6-SEAAD	0.6	111	0.512978	0.0800592	0.0673705	0.283484	0.423018	0.747871	0.205799	0.666308	1.35289	0.632757	0.388201	0.100059	0.109276	0.462874	0.26461	0.589714	0.216914	0.484762	0.174895	0.549682	1.44345	0.795728	0.179787	2.1153	0	1.1498	1.90359	0.638433	0.292174
Astro_6-SEAAD	0.7	675	0.119208	0.0784635	0.0555265	0.213791	0.430618	0.54716	0.0290302	0.60309	1.41112	0.132987	0.421948	0.108667	0.153853	0.472867	0.342907	0.520796	0.215742	0.483664	0.170494	0.343274	1.8122	1.32558	0.200095	1.91876	0	2.20184	2.10726	0.566941	0.137154
Astro_6-SEAAD	0.8	380	0.127118	0.0560625	0.0636137	0.10716	0.422254	0.488023	0.021302	0.55209	1.30148	0.103912	0.388809	0.09604	0.111063	0.528498	0.211816	0.467748	0.176753	0.323393	0.136819	0.337001	1.52131	1.06353	0.160923	1.87937	0	2.06534	1.92799	0.584377	0.0967801
Astro_6-SEAAD	0.9	631	0.19293	0.0552671	0.0429311	0.123727	0.336778	0.720879	0.0389445	0.712418	1.36744	0.222918	0.397371	0.0978127	0.131056	0.462813	0.28906	0.470421	0.175395	0.547269	0.136519	0.322794	1.09768	0.842606	0.154532	1.49411	0	1.86485	1.5769	0.489872	0.123975
Panel C: Network degree centrality (|r| > 0.7)
Gene	Degree	Category
TFRC	16	Iron
VDAC1	15	Mito
GLUT1	15	ANLS
MCT1	13	ANLS
LDHA	12	ANLS
FTH1	11	Iron
PKM	10	ANLS
MCT4	9	ANLS
LAMP1	8	Lyso
LAMP2	7	Lyso
HK1	7	ANLS
V-ATPase	5	V-ATPase
NHE6	4	pH

## Sheet: Fig4_data
Figure 4. Donor-level clinical associations (n = 84)
Panel A-F: Donor-level values
mean_cps	MCT4	VATpase	ANLS	braak	abc_score	cognitive	n_astro
0.302313	0.0327789	0.215518	0.0797161	Braak IV	Not AD	No dementia	2368
0.522889	0.0202005	0.193719	0.0589539	Braak IV	Low	No dementia	1160
0.206549	0.0474884	0.183761	0.0598056	Braak IV	Not AD	No dementia	597
0.725006	0.0355729	0.190529	0.0449211	Braak V	High	Dementia	948
0.760781	0.00678372	0.211621	0.043977	Braak IV	Intermediate	No dementia	1874
0.753888	0.0212423	0.196247	0.0539241	Braak V	High	No dementia	370
0.810865	0.0314266	0.222404	0.0649383	Braak V	High	Dementia	1108
0.23701	0.00831474	0.208278	0.0446607	Braak III	Low	No dementia	1108
0.84721	0.0206537	0.215829	0.0625049	Braak IV	Intermediate	No dementia	1064
0.678277	0.0382189	0.189178	0.0542347	Braak IV	Intermediate	No dementia	193
0.878968	0.0266049	0.229195	0.0836894	Braak V	Intermediate	Dementia	724
0.616531	0.0198874	0.202006	0.0556838	Braak IV	Intermediate	Dementia	749
0.790026	0.0149941	0.199914	0.0686978	Braak VI	High	Dementia	954
0.896074	0.00766186	0.17947	0.0531513	Braak VI	High	Dementia	1980
0.728161	0.025555	0.206767	0.0656105	Braak III	Intermediate	No dementia	1033
0.928513	0.0113965	0.198624	0.0680882	Braak VI	High	Dementia	1580
0.323639	0.0681802	0.238506	0.112886	Braak V	Intermediate	No dementia	83
0.588882	0.0202196	0.179278	0.0413591	Braak V	High	No dementia	732
0.906843	0.0242115	0.220545	0.0787764	Braak VI	High	Dementia	424
0.625951	0.0256387	0.202147	0.0474915	Braak IV	Intermediate	No dementia	1192
0.814934	0.00915109	0.215554	0.0497785	Braak V	High	Dementia	1886
0.612832	0.0221848	0.224006	0.0554987	Braak V	High	Dementia	459
0.786515	0.0444495	0.252937	0.0760026	Braak V	High	No dementia	689
0.777859	0.0372442	0.212205	0.0421414	Braak VI	High	Dementia	682
0.818041	0.0628062	0.189849	0.0647165	Braak V	High	No dementia	583
0.874938	0.0052704	0.162415	0.0455062	Braak VI	High	Dementia	396
0.36833	0.0914675	0.226529	0.114705	Braak IV	Intermediate	No dementia	580
0.204485	0.0182218	0.225965	0.0924613	Braak IV	Not AD	No dementia	246
0.844305	0.0049778	0.155474	0.0415064	Braak V	High	No dementia	365
0.891215	0.00215898	0.151613	0.0297252	Braak V	High	Dementia	419
0.748876	0.00670999	0.18782	0.0442604	Braak V	High	Dementia	1433
0.371467	0.0524824	0.187641	0.0531356	Braak V	High	No dementia	607
0.438827	0.0501103	0.205249	0.104747	Braak IV	Intermediate	Dementia	1235
0.652943	0.0411272	0.22017	0.128958	Braak V	High	Dementia	379
0.442128	0.0405092	0.226398	0.0739329	Braak IV	Intermediate	No dementia	729
0.355632	0.0273573	0.215198	0.0627743	Braak V	Not AD	No dementia	718
0.922354	0.0175993	0.168409	0.0314926	Braak VI	High	Dementia	280
0.868383	0.0126308	0.196258	0.0455125	Braak VI	High	Dementia	1005
0.149616	0.116333	0.250903	0.159989	Braak III	Low	Dementia	428
0.856821	0.027916	0.211001	0.0559091	Braak VI	High	Dementia	711
0.238033	0.0254341	0.212903	0.0909399	Braak 0	Not AD	No dementia	1127
0.261645	0.0461803	0.225356	0.0486504	Braak II	Not AD	No dementia	631
0.575735	0.0286466	0.189593	0.0687472	Braak V	Intermediate	Dementia	1514
0.838096	0.0283227	0.198402	0.066897	Braak IV	Intermediate	No dementia	627
0.723364	0.0469426	0.229393	0.115129	Braak V	High	Dementia	620
0.790347	0.0123551	0.202812	0.0448986	Braak V	High	Dementia	439
0.911019	0.0170322	0.186423	0.10282	Braak VI	High	Dementia	105
0.821793	0.0241209	0.202593	0.0632497	Braak VI	High	Dementia	1577
0.170619	0.0566145	0.180849	0.0446408	Braak IV	Not AD	No dementia	314
0.486297	0.0289062	0.214724	0.0836774	Braak IV	Intermediate	Dementia	284
0.889563	0.0134959	0.191453	0.0494089	Braak V	High	Dementia	981
0.754185	0.054478	0.231934	0.111642	Braak IV	Intermediate	No dementia	387
0.230781	0.0763209	0.221149	0.0708378	Braak IV	Low	No dementia	330
0.336173	0.0139004	0.184589	0.0651734	Braak IV	Low	Dementia	552
0.680216	0.0131797	0.220103	0.0448133	Braak V	High	Dementia	347
0.643946	0.0310543	0.232997	0.16067	Braak II	Low	Dementia	680
0.517476	0.0153128	0.17146	0.0620796	Braak 0	Low	No dementia	1803
0.911077	0.00778383	0.159357	0.0490561	Braak V	High	Dementia	1300
0.704997	0.0134055	0.212437	0.0620269	Braak III	Intermediate	Dementia	544
0.739924	0.0237436	0.197056	0.0804959	Braak VI	Intermediate	No dementia	1528
0.296555	0.0573564	0.217005	0.0570232	Braak IV	Not AD	No dementia	756
0.518005	0.0589315	0.22595	0.0835528	Braak IV	Intermediate	No dementia	834
0.749599	0.0428839	0.215692	0.046875	Braak V	High	No dementia	384
0.687187	0.0600449	0.230806	0.0549462	Braak V	High	Dementia	2085
0.300177	0.0747295	0.195955	0.0960395	Braak II	Low	No dementia	1808
0.910112	0.037342	0.206443	0.0499495	Braak V	High	Dementia	459
0.252443	0.0330959	0.215698	0.0534415	Braak III	Intermediate	No dementia	401
0.834627	0.075595	0.194305	0.0638201	Braak V	High	Dementia	452
0.380411	0.0577084	0.214138	0.0558028	Braak IV	Low	No dementia	277
0.899912	0.0208075	0.219013	0.0589852	Braak V	High	No dementia	797
0.869521	0.0230077	0.182018	0.10776	Braak VI	High	Dementia	1122
0.37697	0.0623376	0.193223	0.0552676	Braak V	High	No dementia	1214
0.690041	0.0184952	0.217731	0.0250434	Braak V	High	No dementia	191
0.180319	0.055199	0.203425	0.0735704	Braak IV	Low	No dementia	415
0.18237	0.0615729	0.24237	0.0633421	Braak III	Low	No dementia	354
0.729332	0.00977974	0.213976	0.0961796	Braak V	High	Dementia	606
0.744518	0.0244242	0.223841	0.0531389	Braak V	High	No dementia	1365
0.303751	0.0381801	0.208771	0.0403657	Braak IV	Not AD	No dementia	700
0.850065	0.0376001	0.21417	0.0678821	Braak V	High	Dementia	722
0.520347	0.0528692	0.227454	0.0849074	Braak II	Low	Dementia	610
0.844798	0.00486225	0.161055	0.0597211	Braak VI	Intermediate	Dementia	500
0.924065	0.0106749	0.224871	0.0404508	Braak VI	High	Dementia	759
0.765704	0.0529206	0.220592	0.0528029	Braak V	High	Dementia	551
0.224783	0.117358	0.223264	0.111329	Braak V	Intermediate	No dementia	296

## Sheet: Fig5_data
Figure 5. ADNI Emory CSF proteomic validation (n = 1,105)
Per-subject CSF protein values (raw abundance, NA = below detection)
RID	DX	AGE	SEX	ATP6V1A_P38606	ATP6V1E1_P36543	MAPT_P10636	GFAP_P14136	TREM2_Q9NZC2	TFRC_P02786	LAMP2_P13473	CTSB_P07858	HK1_P19367
2233	MCI	55.6	Female	45262.1	3033.43	67966.1	405280	89365	229241	59261.9	1.1688e+06	222040
6455	CN	68	Female	51204.8	2553.56	85483.5	508485	91687.2	265680	90612.9	1.62212e+06	281739
413	CN	76.3	Female	36287.1	559.824	71685.2	515832	76836.4	212370	56490.8	1.09313e+06	181441
1075	MCI	67.2	Male	37405.4	1423.49	68459.1	454802	86272.6	209333	51327.4	924039	189504
43	CN	76.2	Male	57610.9	2436.08	102507	487302	104157	235949	124358	1.59553e+06	267135
5170	CN	76.9	Male	42469.9	3419.31	81399.9	482325	97497	252757	71741.8	1.35519e+06	251048
4736	MCI	71.9	Male	57473	4438.5	118864	678221	95409.3	251884	92014.8	1.49763e+06	334260
372	DEM	79.1	Male	44951.2	1170.66	106235	726418	135662	213842	89092.7	1.3061e+06	297612
2308	MCI	74.9	Male	557282	6229.44	955949	5.58988e+06	84020.5	228291	63950.4	1.2519e+06	1.60281e+06
4168	MCI	82.2	Male	43951.8	3406.52	76385.3	514302	86674.4	226610	71562	1.2246e+06	191660
101	MCI	73.6	Male	51744.8	2097.77	84340.4	578052	108217	239164	58700.6	1.14911e+06	273140
2195	MCI	68	Male	58750.4	759.873	113972	544259	105325	253828	64257.6	1.35343e+06	282267
516	CN	87.7	Male	42009.3	1419.05	86426.4	472211	93908.6	223602	50438.4	1.16189e+06	244359
4005	MCI	70.5	Male	43656.9	3067.84	101221	503538	77376.3	204212	79140	1.16154e+06	261172
1213	MCI	74.8	Female	62437.7	3369.15	117401	664775	115584	234204	96880.8	1.42516e+06	301788
4143	MCI	63.7	Female	53995	1996.98	91825.2	577820	93817.6	239963	80536.4	1.31406e+06	300651
5095	DEM	65.9	Male	47028.4	2008.41	86014.3	451092	77897	276388	47271.8	1.18716e+06	233309
6315	MCI	71.2	Male	4756.19	7047.52	66709.1	268664	259627	433125	306402	1.71737e+06	287763
1171	DEM	71.5	Male	6250.24	6208.75	62245.6	288131	267477	334592	309987	2.10893e+06	271380
6757	MCI	71.4	Female	16417	9706.42	119135	210038	327815	473044	511841	1.89756e+06	327051
814	DEM	71	Female	6895.59	10779.9	101565	261834	361514	374569	393451	2.22823e+06	307233
4343	CN	79.7	Male	11386.2	7980.22	90355.1	217141	339252	448659	510360	2.30504e+06	328211
4489	MCI	74.3	Male	11787.4	6553.66	69229.3	265004	358265	381099	441768	1.9833e+06	333040
2216	MCI	68.1	Male	6390.25	5227.93	68988.9	212630	253665	449500	439666	2.43793e+06	269809
2058	MCI	84	Female	8651.69	7556.86	79965.7	272075	295320	395825	237055	1.59789e+06	284939
4224	CN	75.2	Male	6626.58	6433.83	51530.7	220007	270580	367592	250165	1.83704e+06	213558
1098	CN	72	Female	9635.21	5876.7	80872	234805	340968	366645	389831	1.83086e+06	333068
4057	MCI	81.2	Male	9970.11	8267.42	90837	263776	274389	349768	320278	1.8175e+06	322698
38	MCI	76.8	Male	8817.93	7588.11	53792.9	218761	260947	383232	296208	2.1562e+06	289850
118	CN	80.5	Male	9344.97	6108.01	58654.6	211200	306287	395357	300490	1.96625e+06	244799
4928	MCI	77.8	Male	8446.17	5042.35	79212.4	332636	254130	368580	243586	2.22436e+06	267356
6062	CN	67.4	Female	8808.46	7040.37	87106.8	233436	348401	474547	520384	2.26751e+06	291037
6529	MCI	60.4	Female	6900.93	8050.28	73776.5	219730	223883	388318	312791	2.12479e+06	275181
4071	CN	84.6	Male	8320.91	9788.06	68422.3	365204	330871	337476	255565	1.49464e+06	312636
4814	MCI	69.3	Female	8250.44	8387.92	72744.5	251623	265398	326465	344393	2.76012e+06	333070
1045	MCI	82.7	Female	8415.48	14919.5	78183.3	934572	218349	348885	343224	1.8258e+06	326891
4852	MCI	64.2	Female	6623.9	17302.2	105356	292089	313148	309792	448053	2.47967e+06	373125
4320	CN	70.7	Female	5835.05	16246	95443.7	242746	222135	368215	450869	2.02378e+06	328126
4741	MCI	61.7	Male	7115.92	10196	79311.9	400770	231192	293655	333554	2.03207e+06	304594
5026	MCI	70.6	Female	6340.67	13709.4	123136	266486	292185	338560	465196	2.11903e+06	378771
4468	MCI	62.4	Female	7666.99	15302.9	87837.8	562241	213247	316896	379241	1.98621e+06	348728
4172	DEM	75.9	Male	5853.36	10821.3	79920.4	237335	270828	280575	303892	1.5236e+06	288275
4520	CN	67.9	Male	7190.31	13216.5	90267.3	221666	271706	371268	478457	1.9425e+06	318640
4582	MCI	66.6	Female	5891.1	20113.2	98520.7	291624	203526	309229	447103	2.18232e+06	400819
1394	MCI	77.1	Male	6660	15220.4	104190	337231	294185	311598	535026	2.78214e+06	397864
307	MCI	78.6	Male	6364.93	13069.3	67634.5	246000	187914	316138	249389	1.74344e+06	284998
6534	MCI	61.2	Male	5616.32	16611.4	93700.8	189497	362473	384575	516212	2.52722e+06	375578
86	CN	80.3	Female	4470.3	15166.6	81095.4	301969	253360	380877	381372	2.03062e+06	331922
4226	MCI	62.9	Female	5000.61	12496.1	87108.7	192853	265423	364817	577234	2.19322e+06	377416
4755	DEM	71.7	Male	4483.06	14671.8	92409.2	260559	193252	326705	379125	1.63336e+06	328039
2363	MCI	58.9	Male	6072	13786.8	95492.7	215676	233452	306930	460922	1.9508e+06	378909
4902	MCI	75.4	Female	2608.69	1706.16	16936.5	87707	78988.7	161662	423720	1.38387e+06	144249
2315	MCI	68.3	Female	903.433	1030.43	12100.6	73111.2	67217.1	131013	183417	1.19223e+06	96906.8
769	MCI	62.2	Male	1296.12	431.132	9884.35	62975.8	72834.4	133180	143690	909884	83806.4
1295	MCI	76.8	Male	725.637	1564.05	18641	148544	100100	158689	307735	1.22526e+06	140987
6513	CN	66.1	Female	2426.68	1080.29	18836	78561.4	99066.8	193839	366626	1.6138e+06	155500
6083	MCI	72.2	Male	1098.49	470.604	13125.4	67250	119069	142909	260110	1.29867e+06	124360
4482	CN	77.2	Female	1774.97	1071.38	21863.6	88944.9	78306	173472	318073	1.23938e+06	150632
2360	MCI	63.1	Male	1289.06	1458.97	15694.2	59184.5	107768	153747	280178	1.3128e+06	117469
4926	MCI	62.5	Male	1542.49	1167.79	11764.5	62570.8	62914.1	145398	164977	992228	89771.9
4258	DEM	75.9	Male	1932.98	1288.73	14724.6	66759.4	70160	150151	273794	1.32466e+06	100110
5222	CN	67.6	Female	964.584	1114.57	9957.18	55934.9	66995.8	144471	148412	847094	82912.9
6574	CN	73.5	Female	1443.97	647.572	15197.6	70107.2	81097.9	249367	270387	1.2686e+06	118317
790	DEM	83.3	Female	1574.8	1212.18	23535	88693.8	143335	150477	267129	1.29106e+06	151966
2077	MCI	81	Male	1242.14	406.94	9120.25	55618.5	75210.4	141570	133221	816055	73928
4392	MCI	82.5	Male	1259.6	641.757	17605	84763.6	70558.5	154793	196384	1.16592e+06	120424
4557	MCI	83.4	Female	1183.21	1090.29	12515.9	75246.5	82324.7	129440	255060	1.33174e+06	111439
4604	CN	65	Male	900.154	813.781	13445	65851.7	80430.7	142271	235380	1.27847e+06	111001
5196	DEM	72.9	Female	13266.3		32608.5	227110	238083	252889	190858	2.34579e+06	269119
6227	CN	62.1	Female	10816.4		32388.5	209590	220399	273379	242160	2.92392e+06	316907
2153	MCI	76.6	Male	10902.4		17499.9	163144	166848	269444	137540	1.68013e+06	231903
4024	DEM	55.9	Female	11563		60724.1	255004	277513	341542	295479	2.57507e+06	399327
6498	MCI	79.4	Male	10326.7		29179.8	235883	209262	292590	189179	1.71823e+06	299299
2240	MCI	78.1	Male	13175.1		38834.1	282933	220215	305120	189166	1.91247e+06	352238
386	CN	72.4	Female	11148.7		18563	136129	173890	294084	109695	1.47964e+06	240756
4090	CN	71.5	Male	9825.71		30826	262094	265526	292762	211196	2.13917e+06	263507
926	CN	71.5	Female	11837.3		25330.4	202275	215803	267080	153317	1.85651e+06	284527
6635	MCI	56.6	Female	12883.9		31140.9	147538	198705	309682	224802	2.01269e+06	353134
4626	MCI	69.2	Male	10192.1		34578.4	208977	226419	262670	164799	1.67641e+06	271824
6037	CN	67	Male	10326.3		22539.4	156266	183331	371643	155180	1.80388e+06	258814
2249	MCI	75.8	Male	10102.9		33950.3	216527	279457	266190	204752	1.86342e+06	306247
5118	CN	68.3	Female	10093		28532.5	183556	220638	246846	167491	1.88738e+06	243715
1073	MCI	65.7	Female	13981.2		61111	275146	249766	303248	254834	2.01527e+06	358849
718	MCI	80.5	Female	9416.82		38736.7	285559	227619	278856	201837	2.3324e+06	314119
1200	CN	84.5	Male	9879.92		26406.5	215231	275005	271941	179543	2.214e+06	306389
4675	MCI	79.9	Male	1965.04		7083.16	107719	101227	169110	257861	1.44894e+06	130662
925	MCI	74.5	Male	2143.94		4623.88	98781.3	113837	158403	268966	1.53141e+06	109280
1393	MCI	82.6	Male	1135.87		5004.71	119462	121412	161068	226252	1.4776e+06	115729
4958	MCI	69.5	Male	2267.94		4407.33	105761	116329	170521	256458	3.88962e+06	101069
2123	MCI	63.9	Female	2283.58		4022.95	102045	132376	184099	413137	2.62954e+06	124234
4816	MCI	74.2	Male	2482.67		6878.48	103695	114851	208203	213475	1.52558e+06	107783
1398	MCI	77.6	Female	1781.49		6948.49	134699	131356	173095	238636	1.88502e+06	107352
6616	MCI	78.7	Male	2967.83		4598.2	131188	111570	198191	550934	1.49325e+06	101542
4280	DEM	79.7	Male	2747.99		8191.44	116673	121841	194684	235771	1.42978e+06	118940
6452	CN	62.3	Female	2203.55		9090.89	97656	127792	188426	394504	1.92147e+06	129582
5018	DEM	73.4	Male	2388.97		11460.3	114401	97301.1	218245	304190	1.42554e+06	116826
6559	CN	66.3	Female	421.982		6716.16	239629	116068	202777	289016	1.97176e+06	106160
6544	MCI	77.4	Female	1709.11		5177.6	133306	126944	170944	398084	2.18783e+06	113465
4203	MCI	74.4	Female	1818.44		5182.47	90762	135946	185217	281078	1.59073e+06	103480
4386	CN	84.7	Female	1957.38		9853.71	116049	128087	187284	491940	2.07039e+06	159316
5228	CN	77.9	Female	1534.56		6924.52	125594	125165	190543	348227	1.98007e+06	124400
686	CN	72	Male	2595.77		8163.37	100965	96703	166375	220524	1.43304e+06	105424
533	CN	81.1	Female	308.36	224.476	11336.8	175576	82972	170967	195329	2.00224e+06	120793
376	MCI	70.5	Male	663.648	2162.01	10696.7	119190	97757.6	179266	189000	1.90047e+06	123592
300	DEM	56.5	Male	1935.43		18125.4	307281	140568	169859	127961	1.52896e+06	101654
5256	CN	70.5	Female	887.866	907.91	13430	79025.2	96943	232525	142910	1.59348e+06	106351
525	CN	70.1	Female	198.079	763.173	13294.1	79444.5	86474.5	168057	129804	1.44441e+06	95938.1
135	MCI	82.3	Female	767.073	1158.87	12938.7	72040.6	66250.1	166968	125563	1.16536e+06	88689
4653	MCI	80.4	Female	653.144	844.289	10795.3	86407.9	88784.6	186435	130545	1.42659e+06	107997
6805	MCI	61.9	Female	535.004	759.536	9948.2	98520	70925.1	177561	118398	1.30815e+06	118417
607	MCI	78.1	Female	939.69	1174.86	19911.9	112637	98696.7	221075	226039	1.95407e+06	131893
784	DEM	75.9	Female	855.472	1061.58	10401.7	87861.7	74783.5	191311	92533.5	1.16939e+06	97376.1
474	DEM	77.4	Female	1440.13	1077.08	17855.9	107732	89832.4	196310	138078	1.34169e+06	97825.6
4197	MCI	79.4	Male	689.378	1418.01	12880.5	106821	69862.4	155461	154934	1.36332e+06	91722.7
4954	DEM	61.2	Male	319.126	289.109	13924.2	108232	99444.8	174983	155135	1.77811e+06	106628
2124	MCI	82.3	Female	1048.32	1165.13	11533.1	105091	80680.4	182153	192179	1.488e+06	89662
2061	MCI	66	Female	856.572	419.918	12828.5	87992.5	103502	193520	225327	2.71869e+06	95378.1
4405	MCI	71.5	Male	1179.57	2530.98	18999.9	105109	80527.5	237972	273826	1.83717e+06	133556
6007	CN	76.8	Female	1588.96	1047.43	16134.8	121167	94107.9	215506	144958	1.79636e+06	126186
6116	CN	69.6	Female	5374.39		10234.9	135599	92580.4	138386	246791	932366	177004
6013	DEM	60.4	Female	6198.74		10777.5	134375	116966	127414	216692	1.05275e+06	149989
2045	MCI	72.3	Male	6489.14		9548.41	158621	142144	149944	609073	1.55499e+06	172346
6586	MCI	78.6	Male	7298.91		12605	148853	113909	149333	238267	1.03759e+06	154624
94	DEM	70.8	Female	4646.46		12431.5	183107	117010	124125	298276	1.64412e+06	149718
941	MCI	73.3	Female	5288.16		11417.5	170044	156169	122140	243789	1.26879e+06	199481
4807	MCI	72	Female	6878.49		17225.7	182109	125832	148854	438574	1.23752e+06	225041
5007	MCI	71.6	Male	4876.81		8937.88	129291	97482.2	118764	120615	735493	147410
2333	MCI	67	Male	4976.82		10418.6	201198	110992	133819	305921	1.11652e+06	172934
4491	CN	84.1	Male	6552.26		7248.12	132749	105957	125791	220855	952872	119879
4974	MCI	73.5	Male	6544.04		10879.3	115516	105889	141830	258032	982036	146461
2336	MCI	72.9	Female	6004.13		12036.1	178230	154455	147225	349660	1.14867e+06	206934
2180	MCI	77.7	Female	4823.96		6050.26	152861	132506	137387	344764	1.21261e+06	181659
4210	MCI	64	Male	7392.9		12130.6	125883	138910	151927	504588	1.43687e+06	179723
4219	MCI	79.5	Female	4638.81		8353.04	162018	251322	111608	261821	998332	142590
6069	CN	73.6	Female	6346.01		9740.88	185649	161408	129057	364911	1.21792e+06	174599
5209	CN	76.1	Male	8650.83		8655.39	155229	128610	134163	362532	1.46968e+06	220323
544	MCI	76.8	Female	3412.88	3842.85	8939.47	226105	153890	140099	99829.2	1.00834e+06	98439.8
4672	DEM	66.9	Male	6774.38	2553.51	12844.3	197079	125499	136134	123835	1.07646e+06	132957
839	MCI	79.5	Female	5739.67	4213.78	19798	232704	181122	144952	172990	1.52531e+06	149059
6038	CN	77.4	Male	5502.91	2725.72	10329.7	184807	115654	127939	96637	1.08105e+06	124323
6094	CN	69.6	Female	10973	3799.82	15467.9	197874	149853	134637	181404	1.44845e+06	147731
470	DEM	86.7	Female	9094.21	3099.85	15849	185164	172259	133223	218927	1.33511e+06	142741
2052	MCI	73.1	Male	4220.82	3447.61	10277.7	136959	115989	152788	102454	942977	126261
6359	CN	67.4	Female	4321.41	2246.12	12625.4	186183	147900	154833	130998	1.13386e+06	120602
4199	MCI	59	Male	12565.1	6188.29	24471.1	561789	134320	129791	145346	1.45849e+06	214055
1296	DEM	77	Male	6344.03	4414.92	13579.9	255019	156100	119346	224517	1.37218e+06	166451
6742	MCI	68.8	Female	7723.35	3647.49	15282.3	195208	197962	130077	172218	1.73074e+06	139604
388	MCI	71.2	Male	6282.58	4959.99	18409.2	387565	202072	148148	159557	1.26368e+06	154424
4338	DEM	80.6	Male	8163.49	2135.82	13807.5	241203	155778	125523	149378	1.19736e+06	124472
5093	CN	69.4	Female	8072.15	2874.31	13610.3	152536	177140	144743	231178	1.42999e+06	153064
1414	MCI	74.4	Male	5978.03	5235.73	11848.6	199089	225605	145418	116832	1.30745e+06	141132
4268	MCI	63.6	Female	6535.99	4490.64	7613.97	153946	150468	143160	162762	1.27466e+06	120659
5014	MCI	76.6	Male	2985.79	2729.83	8194.43	175979	125304	134597	90392.1	893372	104171
1035	CN	87.3	Male	15856.8		6429.3	160767	118177	176515	131498	1.01965e+06	112128
4077	MCI	75.5	Male	12963.1		3984.27	142425	94443.8	144256	133121	1.19758e+06	117199
4722	MCI	68	Female	20992.2		6821.23	139938	109410	191976	295233	1.38199e+06	118391
4966	MCI	61.8	Male	9032.96		4557.41	139946	101818	186115	166253	1.09471e+06	113744
479	CN	73.5	Female	18466.3		11343.7	221515	162840	192970	319592	1.57143e+06	129525
4467	MCI	61.9	Female	42569.7		18848.1	145634	110259	232439	326815	1.51751e+06	149104
4721	MCI	85.4	Male	10708.5		5957.95	179713	166773	161416	233727	1.49547e+06	112335
6110	MCI	71.7	Female	15815.6		8942.7	174141	145209	221295	278577	1.56715e+06	129450
442	MCI	74.8	Male	12201.8		4659.19	135918	100380	159522	185205	900674	94574.4
4611	MCI	67	Male	15391.6		7166.75	170101	109880	180231	211286	1.34329e+06	114525
327	CN	70	Male	14102.1		7364.98	160324	126801	157698	286661	1.56886e+06	136790
4244	MCI	91.4	Male	8768.01		5779.67	164874	98701.4	155964	126770	1.14848e+06	81221.7
5019	DEM	63	Female	14963.1		9932.98	162683	138742	169022	236370	1.44859e+06	139357
4668	MCI	70.9	Male	14422.8		7253.97	189282	127478	159183	249905	1.57339e+06	137410
4288	CN	72.5	Female	21873.5		7060.83	160482	91898.5	159769	140713	1.07981e+06	107142
2055	MCI	75.2	Male	23521.7		10955.2	196027	160934	183986	290235	1.35721e+06	115740
5193	CN	72.5	Female	22959.4		5534.16	168682	108660	170434	275665	1.35592e+06	110874
534	CN	62.8	Male	19242.2		12892.5	206112	129831	183894	190174	1.31233e+06	147689
6274	MCI	76.7	Male	13958.8		10934.2	197071	109212	152442	127440	884441	99620.8
5087	DEM	64.6	Female	19462.3		17503.7	190557	151693	150137	256379	1.18959e+06	116950
5054	DEM	74	Female	28420.9		19317	172876	155332	168445	366875	1.61611e+06	160000
2031	MCI	72.5	Male	17360.9		12427.6	153915	110790	165649	176076	1.39325e+06	113748
4015	MCI	73.6	Female	18919.4		20140.4	215961	149858	159460	255105	1.3849e+06	179058
488	CN	70.9	Female	15735.6		12326.9	151960	105563	161873	192575	899102	115993
606	DEM	68.6	Female	17370.2		15743.2	215474	163097	132927	281811	1.16603e+06	149535
2125	MCI	78.2	Female	11411.3		10204.5	168997	121402	143004	147531	1.05792e+06	108968
2196	MCI	68.3	Female	20546.6		16124.9	212349	144407	194162	281333	1.48479e+06	145091
1010	MCI	74.3	Male	19821.9		15821.2	175994	144798	177533	188083	1.08068e+06	124542
6462	CN	69.7	Male	13597.8		14721.7	247644	126707	164875	193058	1.3445e+06	102024
319	CN	70.3	Female	18244.2		11223.6	198033	216681	164716	272092	1.71185e+06	142073
577	DEM	72.5	Female	17600.9		21727.2	230935	178587	162786	263223	1.45869e+06	150606
685	CN	89.6	Female	24037.5		14099.9	213459	223765	167237	225562	1.14401e+06	140748
4430	MCI	80	Male	17805.8		15348.3	221813	158910	167160	215891	1.20734e+06	114505
6550	MCI	55.9	Female	16281.7		12060.3	190114	105597	153131	178220	1.39298e+06	119231
4899	MCI	81.9	Male	5434.99	1417.23	11063.5	240016	110105	135823	168970	877921	74278.1
1315	MCI	83.4	Female	4511.57	2141.95	11165.5	215099	164505	141185	272241	1.28138e+06	121847
336	MCI	76.1	Male	7414.67	2488.97	17246.4	226000	269746	121439	259925	1.35426e+06	137648
2301	MCI	65.8	Male	8636.32	5531.01	9085.6	156052	102124	140551	198545	1.20584e+06	111168
6297	MCI	81.5	Male	7447.98	1314.86	10470.8	200504	149624	130612	306905	1.59215e+06	143069
4337	CN	72	Male	5206.7	2971.58	9908.2	190870	160606	121928	204958	1.09196e+06	105200
978	MCI	73.2	Male	5903.54	2148.33	15150.1	183282	148893	118766	219113	1.14957e+06	147426
4134	MCI	68.8	Female	5584.32	1638.51	14265	193915	167412	140235	409044	1.52472e+06	145916
6632	MCI	74.5	Female	5729.51	2199.82	20161.8	231598	151868	140669	230859	1.381e+06	137796
240	MCI	88.3	Male	4736.13	2409.13	11450.5	266189	198234	142061	329781	1.54224e+06	112014
6226	CN	65.4	Female	4455.85	2047.67	13566.9	164918	154847	133458	435202	1.66419e+06	150024
4920	MCI	61.9	Male	4470.82	1694.93	14361.8	256477	135350	136754	325761	1.55558e+06	112842
4990	DEM	75.1	Female	3728.72	1999.05	15638.4	325849	131043	110862	251761	1.26518e+06	109036
6731	MCI	66.9	Female	7567.64	2503.4	13687.2	225017	207171	142984	244368	1.51779e+06	142035
5063	DEM	71.5	Female	6662.71	1972.14	18177.7	221184	335699	151806	473024	1.6101e+06	142143
5082	CN	69.3	Male	4485.43	1582.27	9643.87	189746	137974	119185	322564	1.33912e+06	123647
1120	MCI	77.9	Female	4450.78	2324.12	11893.8	189984	170503	123981	245616	1.29674e+06	116294
4503	CN	71.7	Female	3030.67		21926.2	81153	98781.9	190785	278239	1.79986e+06	159472
291	MCI	79.4	Male	2842.52		22641.1	102557	99423	180836	255918	1.50814e+06	130014
691	DEM	64.4	Male	2436.25		11554.1	130195	78826.8	156952	156750	1.11975e+06	95279.8
14	CN	78.5	Female	2506.22		20969.4	132795	121310	168205	328562	2.04414e+06	160024
6433	DEM	76.5	Male	2584.11		25392.2	113958	85580.6	165003	241639	1.5843e+06	179290
4444	MCI	77.6	Male	2194.21		18997.3	102485	101122	184181	163904	2.56013e+06	120710
6175	CN	69.3	Female	3033.36		27487.7	86370	116293	248294	318307	1.67006e+06	173868
5237	CN	80.3	Male	3302.6		23434.2	92183.9	104310	224258	173379	1.56503e+06	165294
4020	CN	66.5	Male	2139.44		21559.8	95634.1	109323	210949	417386	1.84803e+06	152751
6705	DEM	75	Male	3537.44		24307.7	206579	111529	177307	312097	2.04627e+06	186366
746	MCI	73.9	Female	2439.08		23885.3	104023	114798	185487	375967	1.89753e+06	152543
285	MCI	65.7	Male	1911.19		27836.5	97037.4	96246.8	187094	193497	1.68342e+06	143802
4960	MCI	59.6	Male	2246.73		23420.2	110892	94049.3	184994	282860	1.66596e+06	112790
5070	DEM	71.2	Male	3193.09		15191.6	107609	79815.2	147655	210827	1.48522e+06	134726
40	CN	73.3	Male	1860.63		19278.4	107275	106340	158272	291803	1.73301e+06	173940
6610	MCI	61.4	Male	2357.6		19197.6	114806	106772	187014	199560	1.3095e+06	124999
6549	DEM	66.1	Male	2951.78		27462.3	110620	99160.5	168359	268434	1.51658e+06	151679
4100	CN	78.6	Female			16194.1	114511	126795	88882.7	221782	993472	158815
6385	CN	66.6	Female			17301.9	132675	150849	123454	322447	1.67878e+06	173319
4	MCI	67.6	Male			17466.6	108630	119383	109673	266667	1.48696e+06	160502
70	CN	74	Male			14783.4	91241.2	128437	113948	202153	959731	128075
446	MCI	88.8	Male			16571.2	84015.8	120776	104672	129502	864052	148556
5263	CN	75.3	Female			22384.2	125137	163977	110877	615145	1.6762e+06	169740
57	MCI	77.4	Male			19543.5	99685.3	136377	93792.6	223969	981278	153945
5121	CN	76.9	Male			19158.3	98601.9	123678	115585	286661	1.49502e+06	140298
6414	MCI	69.2	Female			14233.6	107344	133262	119458	324406	1.62604e+06	204854
5109	CN	78.4	Male			18099.2	100857	112655	107955	138823	838172	117821
4530	MCI	75.9	Male			15107.3	134939	135517	111985	202871	1.22284e+06	152649
5142	CN	76.3	Female			16086.9	128696	146385	115602	302048	1.26889e+06	169615
6113	CN	76.2	Male			12530.1	95454.7	104986	95788.9	210788	1.02947e+06	131929
1309	MCI	69.2	Female			19477.8	100010	138812	92494.9	311535	1.08431e+06	168428
4340	CN	66.7	Female			14795.4	119172	261702	115054	276994	1.65592e+06	191780
4605	MCI	84.7	Female			20523.3	122968	138169	102557	351428	1.40889e+06	149416
147	DEM	59.8	Female			17838.8	142548	133997	105820	256433	1.56548e+06	194804
6307	CN	76.3	Male	4776.65		17023.5	186913	121194	144338	156238	1.11499e+06	100508
4949	DEM	78.1	Female	4751.5		26399.2	180478	108222	175172	267519	1.44702e+06	147081
4526	DEM	79.5	Male	6779.09		23733.7	177001	136750	159708	220087	1.26343e+06	151963
2036	MCI	66.7	Female	4767.77		22739.8	194318	140411	167384	206557	1.59296e+06	144428
2316	MCI	74.4	Female	8975.86		23572.1	189206	131093	162579	241689	1.34628e+06	137205
231	MCI	60.4	Male	17039.2		22874.3	851692	402656	292760	177401	1.76782e+06	370145
4586	CN	75.8	Male	12170.7		25211.9	207610	166373	189787	251338	1.17542e+06	123754
723	MCI	79.1	Male	6079.37		18605.2	208212	134462	166279	213562	1.28454e+06	133487
299	DEM	89.1	Female	6819.61		19772.7	200338	140910	157730	259482	1.66033e+06	136557
6512	MCI	78.2	Male	7444.94		16878.8	193889	119958	144978	146169	983913	101485
1419	MCI	77.9	Male	5008.38		26332.5	215493	138257	176183	284085	2.24306e+06	176557
404	DEM	87.8	Female	7014.23		21705.7	231361	120496	137384	150879	803422	120361
4893	MCI	68.2	Female	6672.92		29726.7	224796	125073	183977	249313	3.68468e+06	162954
5185	CN	69.9	Female	9340.7		34539.3	220276	150111	209780	360015	1.53973e+06	149755
4308	CN	74	Male	3230.18		20554.1	197015	145116	157371	224343	1.29408e+06	154648
464	MCI	83.2	Male	39495.7		10964	217251	115877	173569	171004	1.2089e+06	116606
123	CN	73.3	Male	5512.47		18093.9	215239	153860	181336	210253	1.1567e+06	118895
1052	MCI	69	Female	6504.04		4827.79	176282	94347.9	172794	161583	1.15736e+06	110924
476	MCI	75.8	Female	10870.1		7398.88	220994	140456	179568	231670	1.55853e+06	130917
5175	CN	79.5	Female	10685.6		4838.23	164113	136933	144052	215612	1.23198e+06	126998
5004	MCI	64.6	Male	8994.29		3998.19	171688	111730	220695	182640	1.10474e+06	125725
6580	CN	79.9	Female	11031.9		3584.22	491235	118667	162920	233262	1.4579e+06	133740
4919	MCI	74.8	Female	8981.84		6027.34	551424	125199	152843	324656	1.45301e+06	134390
221	DEM	67.5	Male	15199		5733.35	184659	107789	164457	167369	1.04508e+06	129114
5062	DEM	71	Female	12156.9		8583.77	213863	123724	153804	286012	1.27122e+06	142965
4185	MCI	80.4	Male	13576.3		3599.09	152618	118246	122755	189260	1.13602e+06	96536.4
2398	MCI	71.5	Male	10420.3		4889.05	303818	133636	141023	253773	1.56255e+06	144657
4125	CN	75.8	Female	7985.17		3802.48	191833	138354	138888	307803	1.85072e+06	124644
680	CN	77.8	Male	7872.76		3581.81	172430	117522	129953	160625	989408	99803.9
5197	CN	79	Female	10916.2		2332.06	203331	181167	163416	243568	1.68776e+06	113690
2332	MCI	70.6	Female	8459.31		4775.12	159239	122029	156950	199531	1.18532e+06	122955
6643	MCI	56.4	Male	13070.1		4246.13	167642	143640	170413	242015	1.33254e+06	138155
4391	CN	74.5	Male	5786.12		4145.66	185820	133458	143237	242579	1.17739e+06	114869
4208	CN	78.2	Male	9710.02		4177.9	154445	100424	147604	192787	1.0823e+06	122763
4424	CN	66.2	Female	3782.27		5880.46	151865	66827.1	123015	238344	1.53994e+06	140143
4310	MCI	62.4	Female	2725.43		3234.77	171776	74003.7	116812	210837	1.44468e+06	106165
6744	MCI	62.2	Male	4356.52		5543.88	179141	66140.6	127460	142027	1.10378e+06	102067
566	MCI	78.9	Male	2430.02		4362.89	181807	62268	137992	128460	1.00328e+06	96888.4
4512	CN	68.1	Female	2929.38		6457.23	151353	82182.3	155396	285018	1.3572e+06	131206
4918	MCI	69	Female	2743.84		10526.7	176714	95198.1	139595	213942	1.26085e+06	145035
649	MCI	86.7	Male	2959.22		6315.9	177056	74984.5	109265	177942	1.14338e+06	115831
5230	CN	73.5	Female	5147.24		7831.69	175512	103203	154018	278924	1.43643e+06	151772
5176	CN	65.7	Female	3609.35		4345.46	189226	82247.2	118455	255824	1.75365e+06	139767
6264	DEM	55.3	Male	2716.04		5370.15	183511	91121.3	115573	241822	1.73096e+06	128706
5135	MCI	77.1	Male	3570.3		3300.28	164917	61806.8	139609	140233	1.14001e+06	109524
4371	CN	67.8	Male	3880.31		5718.33	175205	65367.1	113429	146220	1.14049e+06	130137
4422	CN	70.8	Female	2972.66		7825.53	181728	84437.9	131210	309877	1.69467e+06	144653
6222	MCI	73.9	Female	2084.02		5228.09	214551	72075.9	98564.1	163893	1.21768e+06	133381
6051	CN	66.4	Female	3753.97		2633.08	178825	44692.5	113240	179925	1.22691e+06	103525
4266	CN	69.8	Female	2741.81		4560.94	166329	78215.5	120646	286227	1.41101e+06	155586
4164	CN	72.7	Male	3427.01		5911.04	168958	80894.5	107935	179452	1.05469e+06	99588.2
619	DEM	77.5	Male	3812.81		4995.09	219119	113790	133644	146159	1.14359e+06	120723
4428	CN	72.6	Male	3791.71		4140.29	137714	118901	113960	235379	1.32753e+06	128752
1059	DEM	84.5	Female	3153.41		5065.38	175517	134795	114621	176233	1.22243e+06	152063
4254	CN	86	Female	2855.25		6088.11	140494	154394	120477	183830	930223	104006
127	CN	70.7	Male	4676.48		5486.26	118413	131965	141093	157559	911315	148737
6389	DEM	69.7	Male	4890.41		5521.94	155179	125035	120223	162764	1.03578e+06	117686
4058	MCI	84.6	Female	4443.27		4802.55	180337	106311	106916	192155	1.26916e+06	96118.1
366	DEM	56.5	Female	3999.62		5114.92	166008	117757	134922	165851	924755	128142
2396	MCI	70.3	Female	2207.36		6672.21	127106	123563	117760	209158	1.2125e+06	137860
159	CN	77.9	Female	6309.13		2576.03	122728	84743.5	100007	140517	858367	141712
4410	CN	69.2	Female	3567.99		7613.27	138585	121417	131262	268598	1.20195e+06	135859
892	MCI	72.8	Female	3120.45		8015.77	164655	137116	129465	230116	1.47807e+06	141604
4120	CN	81.8	Female	2999.08		6465.87	174831	98865	124285	192328	1.31698e+06	127065
6180	MCI	86.8	Male	4242.87		3816.38	141548	91075.8	116562	187818	1.07238e+06	121533
4153	DEM	79.3	Male	5446.32		7057.82	219846	126352	117087	202501	1.04247e+06	125889
4269	CN	65.7	Female	6213.29		3649.78	137517	109099	116701	156584	823222	95180.7
932	MCI	75.4	Male	4627.48		4910.69	174638	108856	118761	135053	930183	86948.6
2220	MCI	82	Male	20577.8		14528.4	130971	59925.7	138980	153330	1.31497e+06	100764
294	MCI	79.2	Male	21482.6		18154.3	120369	81228.5	149399	187926	1.12457e+06	146441
4952	CN	69.4	Female	18436.2		15608.4	106487	63249.6	128812	143012	1.32341e+06	104352
4623	MCI	61.1	Female	25476		17875.1	113993	65204.3	145321	251905	1.29165e+06	138544
2187	MCI	57.7	Female	25001.9		18195	132086	71953.4	148764	243425	1.18654e+06	116878
194	DEM	80.5	Female	19436.5		25916.7	163181	94451.4	156981	248440	1.48944e+06	176636
726	CN	81	Male	21689		17936.1	131522	62628.8	146253	245303	1.21558e+06	112556
4237	MCI	80.9	Female	20113.5		19245.8	140259	85399.9	145237	209131	1.44855e+06	135659
4868	MCI	77.2	Male	23062.7		17251.8	151349	69260.8	162247	144703	1.16188e+06	127640
904	MCI	84.2	Male	21047.8		24856.6	139159	74414.1	137371	136974	1.19805e+06	108234
6323	CN	66.3	Male	20405.3		15215.8	107211	47616.7	131787	81829.9	953142	79988.7
915	MCI	80.6	Female	22830.8		19695	180668	71783	157336	145809	1.64706e+06	147110
2133	MCI	62.5	Female	23119.3		23969.7	130368	62724.3	157563	237525	1.19951e+06	162148
4363	MCI	73.5	Female	21864.8		19856.9	117120	86454.9	129951	231649	1.21193e+06	144404
4552	CN	63.2	Male	25689.9		16516.4	117759	54452.7	155224	108964	757953	77532.9
95	CN	71.2	Male	27882		17785.6	131825	84645.2	163115	304181	1.34396e+06	142613
5288	CN	81.9	Female	20107.2		19446.7	141769	82504.7	162588	313652	1.43412e+06	128610
796	DEM	80.4	Male	8341.63		7550.44	104612	78616.9	108721	85547.8	763600	110614
1002	CN	76.3	Female	6365.11		8255.73	132987	64477.8	127310	157788	913796	154934
5124	CN	76.7	Female	8946.49		11180.1	144944	89935.9	142438	125182	1.18823e+06	155624
4505	CN	80.4	Female	6827.61		12069.1	138236	111486	155629	194757	1.73592e+06	218166
4138	MCI	88.5	Female	7767.08		13366.5	146824	112660	128124	107507	1.08166e+06	175605
5141	CN	76.8	Male	6922.88		9825.1	127577	83528.8	155132	118980	1.14658e+06	145889
610	CN	79.1	Male	8643.42		10538.9	112790	82124.1	156624	84698.7	756753	127915
2060	MCI	73.9	Female	9467.13		11180.4	136199	114588	138700	131982	1.16879e+06	160272
2047	MCI	77.4	Male	6701.2		14318.8	156913	76441.7	166076	125572	1.32746e+06	182877
1077	MCI	83.4	Male	6956.55		10788	124393	105000	125461	86844	1.11981e+06	150412
4729	MCI	77.8	Female	6427.42		19652.9	145413	158249	149549	154587	1.34609e+06	200690
42	MCI	72.9	Male	7142.64		13175.2	146487	97710.3	125465	96768.8	1.10473e+06	137964
4167	MCI	69.6	Female	7028.47		11276.3	127416	94284.2	139650	99110.2	1.07224e+06	142697
4874	MCI	57.7	Female	7254.89		12885.6	129247	92563.6	150869	190696	1.76033e+06	204168
6173	CN	70.5	Female	7621.16		14893.4	162700	83186.2	175029	123966	1.04614e+06	149019
4448	CN	63.8	Female	5573.2		14328.8	159575	101900	177683	173707	1.13133e+06	154595
6467	MCI	71.2	Female	8097.78		14329.3	128117	136895	177202	155404	1.40811e+06	182555
690	DEM	79.6	Male			57511.6	135536	77084.9	194294	119638	1.50025e+06	169184
316	DEM	80.9	Male			61168.1	126145	96010.2	199867	123914	1.62341e+06	155779
293	MCI	87.8	Male			46508.3	112804	80000.4	207944	105450	1.14575e+06	148917
6192	CN	83.3	Female			56785.7	117451	88369.7	213537	132701	1.50357e+06	148622
4885	MCI	75	Male			64513.8	102659	69739.5	213730	141388	1.56034e+06	144804
4498	MCI	77.6	Female			58667.7	104193	96569.5	186692	107001	1.51237e+06	145651
4162	MCI	71.3	Female			56079.4	95264.4	67484	206056	118564	1.27789e+06	137000
2121	MCI	67.8	Female			56890.3	121235	90011.9	221711	145330	1.82729e+06	175534
4194	MCI	62	Male			45291.3	123043	66132.3	225055	134656	1.78746e+06	160276
5198	CN	69.2	Female			60010.3	96334.2	62065.1	201420	115728	1.39534e+06	124471
96	CN	79.6	Male			58456	94032.7	66515.3	202488	95996.6	1.35017e+06	131039
6080	CN	76.9	Female			55244.9	101083	56850.3	186729	89180.8	1.1674e+06	133030
4324	MCI	62.9	Female			50881.4	114608	71280.8	155169	119054	1.61979e+06	91513.8
4293	MCI	69.8	Male			60088.2	81227.7	79910.7	170347	99114.2	1.04059e+06	133647
913	MCI	56.7	Female			44383.3	92622.1	68504.9	176815	95017	1.59434e+06	156821
4445	MCI	73.8	Male			60627.8	95703.6	56162.2	188508	82950.6	911705	127725
861	MCI	87.2	Male			63716.4	115261	80038.2	216919	79100.9	1.11e+06	134285
196	CN	78	Female	3185.5	1382.97	6604.52	165634	96544	123151	218212	1.54029e+06	144545
1260	MCI	71.2	Male	2383.98	1480.76	5727.79	118009	104202	111036	109744	1.09505e+06	127440
6493	CN	79.6	Male	2379.29	1288.55	4914.49	125167	74158.9	103826	99847.8	1.11807e+06	105646
1373	DEM	75.4	Male	2580.87	1210.37	10120.8	171110	99355.8	122772	136253	1.17774e+06	130161
4849	MCI	65.9	Female	4346.29	1216.58	7770.99	171512	85390.6	141327	259457	1.64959e+06	165790
149	DEM	87.8	Male	2281.75	1649.94	7733.59	196704	77094	99833.4	185120	1.40083e+06	144014
6298	CN	69.5	Female	1717.88	1514.36	8501.56	145809	77210.3	141972	242505	1.42088e+06	160169
4959	DEM	77.5	Male	2368.92	1037.73	4115.26	107901	68749.6	99504.7	95917.4	928643	100356
326	MCI	76.9	Male	1958.5	1601.59	5909.91	157387	97525.1	119568	126940	1.37406e+06	128989
4547	MCI	77.4	Male	1304.59	1082.35	6769.88	166626	112888	104909	187706	1410588	110626
4944	MCI	68	Male	2929.63	1292	9441.3	135414	87373.6	119267	134442	1.37637e+06	166170
6401	CN	75.7	Male	2222.41	1376.95	8421.96	123387	97343.8	112641	162922	1.21464e+06	133212
5159	CN	66.5	Female	2442.1	1396.46	6960.34	129186	74339.5	132966	178217	1.41322e+06	146113
4718	DEM	78.6	Male	1986.22	927.476	10226.1	149839	83267.7	109295	138656	1.39453e+06	157339
5083	CN	73.8	Male	3221.53	1355.93	5540.8	140746	94210.3	121750	163900	1.50849e+06	145882
4906	DEM	75.8	Female	2234.99	2184.55	13770.5	226916	102845	118908	256946	1.77694e+06	202737
1227	MCI	64.7	Female	3341.36	1319.93	5322.58	112480	83679.8	98564.9	127368	1.02736e+06	127450
6341	MCI	67.2	Male	2095.11		9079.52	148875	85716.1	174152	181913	1.27334e+06	143731
4086	CN	81.8	Male	1750.74		4406.95	161679	68159.9	157187	144676	1.0366e+06	124504
4502	MCI	58.5	Female	2037.95		11679.4	146277	83784.8	201353	233060	1.73113e+06	174470
1330	MCI	61.8	Male	1563		7913.13	151159	70513.4	182859	160405	1.00869e+06	144473
2304	MCI	61.4	Male	2823.59		8534.85	148627	91675.8	179451	195490	1.40549e+06	165798
4506	CN	71.6	Male	2631.57		7137.77	152500	71192.3	165761	151008	1.1247e+06	114921
4092	CN	81.5	Female	1247.1		12016.8	160283	86921	175104	204732	1.3435e+06	167155
5244	CN	75.8	Female	1652.29		7552.25	192591	96969.6	168018	217084	1.4756e+06	125917
4785	CN	66.8	Female	2127.76		6161.69	214340	96710.1	171999	228500	1.4817e+06	164458
6760	MCI	70.8	Male	1596.67		10569.9	176994	84918.2	171840	185685	1.49108e+06	153095
657	CN	77.8	Female	1170.63		7373.32	153571	108530	166595	183466	1.23761e+06	133255
4211	DEM	80.9	Female	2779.12		13396.2	294004	100972	186164	282421	2.02673e+06	163925
4285	MCI	74	Male	1649.41		7563.59	193004	73833.3	156653	164545	1.35777e+06	147626
4018	CN	76.1	Male	1523.53		9224.12	185225	75866.1	172624	178118	1.31609e+06	118158
4346	MCI	71.3	Male	1634.32		8397.02	187483	73768.8	173207	179961	1.15425e+06	140567
5258	CN	77.9	Female	1291.14		10528.7	213798	83181.9	175724	276321	1.47663e+06	192760
102	MCI	70.3	Female	1871.07		10970.8	207314	110156	148847	162447	1.51728e+06	163769
5266	CN	66	Male	10815.3	1810.02	9961.43	157011	135826	177308	152433	1.57719e+06	137547
518	MCI	69.4	Male	9105.36	5487.59	9338.76	179239	113492	153834	98583.4	1.24926e+06	159467
6316	CN	77.5	Female	8995.65	4027.47	8570.66	239220	145766	166154	118166	1.3966e+06	160990
535	DEM	76.8	Male	7481.74	3923.67	8855.59	199585	147067	162089	99575.4	1.20346e+06	150164
5213	CN	65.4	Female	9506.46	4678.93	8059.54	181780	140015	160109	124150	1.58155e+06	157626
6056	MCI	65.1	Male	8573.41	3652.9	6201.29	299575	129705	145421	72686.8	1.44559e+06	145840
923	CN	83.2	Male	9088.39	4062.55	8410.59	260983	155233	154429	145861	1.33631e+06	164277
4214	MCI	74.2	Male	9607.61	3700.59	5700.69	204778	109706	135875	81887	1.33678e+06	105105
223	CN	78	Female	7858.93	3590.99	11401.4	190319	223550	156166	124472	1.35956e+06	161679
6334	MCI	72.6	Male	7609.34	2863.76	6293.47	184501	110032	180418	66728.1	969994	113125
5012	DEM	76.3	Male	7743.14	2826.64	8658.29	149077	113589	137350	78273.8	1.13967e+06	136933
4010	CN	70.8	Female	8576.95	3109.26	8930.25	233882	163332	148145	131456	1.49466e+06	166705
673	MCI	78.3	Male	8367.64	4942.52	9146.23	214676	235315	167821	99717.5	1.39537e+06	150779
4678	MCI	72.4	Female	10503.3	3315.71	10101.9	243817	168400	155877	169470	1.43627e+06	167220
6125	MCI	71	Female	13566.8	5280.36	11340.1	209536	204819	192414	193099	2.41195e+06	176314
4174	CN	73.7	Female	8767.71	3914.51	10030	205119	165906	187267	242511	2.10592e+06	195966
4903	MCI	77.3	Female	13440.2	4655.88	11447.2	201086	166321	175683	113508	1.51875e+06	213833
4003	CN	72.3	Female	4186.28		8233.56	63861.4	55771.3	144762	174365	1.00444e+06	151335
312	CN	82.9	Male	3018.46		8837.97	56586.3	59398.5	124663	116598	938608	153439
4962	DEM	80.1	Female	4027.43		9097.91	68338.4	64564.4	126611	129783	1.05522e+06	195914
6702	MCI	64.5	Female	2205.58		8528.51	56981.9	67013.9	154100	151033	1.37916e+06	189067
1285	DEM	80.1	Female	2899.01		12991.8	104567	50710.8	148648	123838	1.04344e+06	171773
2205	MCI	84.8	Male	5996.29		5105.63	54262.7	53098.8	125728	97046.3	865928	143041
4263	MCI	74.4	Male	4685.09		10068.3	80518.1	75754.1	157211	152827	1.14016e+06	184331
4888	MCI	74.8	Male	3083.34		6296.43	54046.5	62260.4	141837	106360	805448	119956
4515	MCI	74.7	Male	3005.32		7472.21	58598.4	47342.7	134874	101602	829446	101527
4292	CN	70.9	Male	4302.71		7230.03	82328.2	69199.5	147017	162167	1.34906e+06	167524
6333	CN	77.9	Male	4621.53		8147.72	71236.5	51160.6	142639	120813	1.27033e+06	145000
4560	CN	70.4	Female	2748.31		7301.6	73330.3	62671.4	138776	222189	1.77698e+06	206888
4804	MCI	79.5	Male	2558.67		6095.33	62721.1	48170.6	107496	87695.5	742408	92478
5282	CN	67	Male	5274.95		8882.36	76464.3	59453.1	119649	106892	1.11451e+06	140082
4891	MCI	59.7	Male	2993.42		7694.66	56590.6	50959.3	139045	108112	1.07284e+06	140037
4947	MCI	74.5	Male	3286.32		10688.5	68589.9	58352.5	149291	164329	1.14857e+06	164031
6015	CN	68.3	Male	3530.09		6209.33	58783.8	51349.5	140132	119514	1.33791e+06	160778
4706	MCI	60.7	Male	2878.82	1444.13	3058.66	83568.3	67391	165652	249613	997923	187455
5177	CN	72.6	Female	4119.41	1792.47	4514.55	76701.9	71560.7	205197	251403	1.03932e+06	224371
604	MCI	86.6	Male	2644.47	1458.92	2137.4	92582.8	72309.7	145044	159992	1.03224e+06	161792
1030	MCI	67.5	Male	2519.44	2508.21	4526.81	85360.6	87007.6	176627	193544	1.06704e+06	204556
4146	MCI	61.8	Male	2569.65	1784.82	2866.9	81418.6	66047	165767	213339	1.00409e+06	192772
4301	MCI	74.6	Male	3194.91	1809.55	2463.94	79790	68654.7	157124	183942	928341	167899
5167	CN	66.7	Male	3285.05	1519.93	4828.23	113036	68603.6	167467	186402	755694	170656
4148	CN	73	Male	3677.08	2081.33	2848.17	87142.5	64045.7	193682	333052	894775	163074
4856	CN	65	Female	4105.7	354.363	2209.94	87336.5	67067.8	144346	157866	819574	132061
4217	MCI	76.4	Male	3248.22	1333.55	3859.83	88782.2	50202	149304	151425	753189	144207
4036	MCI	74.1	Male	3543.94	1600.7	3527.5	67257.3	60604	165818	201957	910936	148201
1337	DEM	71.5	Male	7776.7	3060	1904.93	74547.5	52839.7	144486	120268	684881	185107
6483	MCI	62.7	Female	3515.03	1454.03	2133.61	64415	70480.7	171952	148080	753110	146046
4335	CN	71.7	Female	3122.97	1843.77	2993.66	85443.1	56657.1	164276	232643	1.06665e+06	168953
4674	MCI	77.9	Male	2538.09	830.357	4701.1	99408	78769.8	159378	226940	845487	206871
2263	MCI	62	Male	3990.25	1434.25	3115.72	90213.7	52489.2	160025	163056	860191	165165
4158	CN	84.3	Male	3649.72	2833.21	2580.5	86339.8	59325.6	152292	198353	1.14041e+06	228174
2274	MCI	64	Male	4724.27	718.452	10221.7	74586.3	65273.3	110953	124008	1.15735e+06	152702
4621	MCI	69.9	Male	4574.95	887.472	8581.57	93975.3	69629.4	126239	170733	1.55945e+06	176283
4187	MCI	62	Male	4843.63	1605.27	7638.26	70389.6	60055	124328	131053	1.07478e+06	152434
243	MCI	68.1	Female	4363.99	1335.76	14618.4	92822.9	85948.9	121055	165297	1.24451e+06	239422
213	DEM	63	Male	8620.14	1743.88	14366.5	87193.7	67927.9	120094	195988	1.35937e+06	254806
84	DEM	75.3	Female	11004.8	1692.06	15399.5	117298	86513.1	132203	161091	1.53245e+06	162882
973	MCI	76.8	Male	5974.46	713.318	8191.88	81621.7	57138.1	110580	115273	1.07298e+06	193868
658	MCI	72.2	Male	4569.58	1614.76	11899.8	93861.9	72898.2	124701	195984	1.27565e+06	226181
4876	MCI	74.3	Male	5411.69	1607.17	8275.1	87413.4	68115.6	124112	124844	1.09615e+06	163934
4863	DEM	70.1	Male	4751.4	1531.11	14040.4	106906	86355.7	131356	273139	1.44166e+06	265314
4176	CN	84	Male	5674.4	1576.74	12727.7	84442.3	67534.8	145559	199101	1.2163e+06	212374
6251	CN	65.6	Female	6230.57	1159.58	12838.4	106911	85338.8	147716	153144	1.26035e+06	187848
1352	MCI	85.9	Male	6220.76	1108.54	8150.59	88615.9	67026.3	137210	181484	1.38373e+06	159350
6234	CN	70.6	Female	3521.76	960.792	8898.82	72354.6	52364.1	137048	117978	892400	135684
4630	MCI	65.5	Female	5463.73	1483.82	7640.31	87742.3	77904.7	121901	187674	1.64214e+06	207934
2119	MCI	71.7	Male	6553.24	1612.98	9994.6	101971	56127.1	123621	145884	1.22678e+06	173908
390	MCI	80.5	Male	5936.76	293.583	15441.2	125858	76363.9	125986	139926	1.21408e+06	226082
997	MCI	80.5	Female	18943.5	2270.8	13275.7	93044.9	76920.4	168725	113448	1.30106e+06	202830
4463	MCI	66.5	Male	13109.9	2371.77	7577.49	57222.1	63718.2	168952	58075.1	971838	128669
6039	DEM	56	Male	14134.4	2671.87	18182.7	82677.3	79027.3	206743	90687.8	1.30521e+06	213367
692	CN	76.7	Female	20356.8	2077.53	14874.3	121633	86036.6	150835	84046.6	1.39755e+06	132623
2109	MCI	75.2	Male	22257	1679.16	14790.3	125866	114332	167053	113411	1.41528e+06	174322
6411	CN	71.4	Male	18437.5	3587.93	14618.3	102954	75626.2	155865	95082.7	1.28318e+06	150875
4241	MCI	69.8	Female	17277	2278.88	19900.2	95894	94782	158228	152237	1.71529e+06	178450
4596	MCI	65.8	Male	13336.4	3141.81	13480.9	93765.8	87780.1	190649	82541.1	935069	152913
4080	CN	78.6	Female	20250.1	1782.08	12636.4	85237.5	97634.5	231709	88050.1	1.13678e+06	210917
6202	CN	69.7	Female	24601.1	3028.57	15577.9	104121	75916.3	187993	140744	1.41463e+06	177352
717	CN	76.1	Male	25427.4	2927.34	17849.7	102259	77748.6	167893	142189	1.41001e+06	187287
5194	CN	65.2	Female	17001.6	3105.47	9424.29	107354	58804.3	174415	79294.1	1.08299e+06	137655
188	MCI	86.2	Male	26335.3	3303.53	22551.3	117043	90937.2	182270	101517	1.18565e+06	205442
4657	DEM	71.6	Female	32731.5	5456.28	29295.8	114366	104203	169302	140335	1.2836e+06	244668
4128	MCI	72.9	Female	20674.5	3538.73	16642.3	114992	85235.7	169094	97267.8	1.22345e+06	190496
4041	CN	77.9	Female	15754.5	2215.99	11966.6	67817.6	49524.2	148919	79061.2	939667	144238
4712	MCI	74.4	Male	25410.1	2169.78	22378.6	93684.6	101666	170933	117729	1.09426e+06	201059
1209	DEM	72	Female	4264.79	6100.02	10572.7	89768	107700	135451	119814	1.38618e+06	121210
638	MCI	83.2	Male	4414.97	6939.77	8789.69	100965	90011.8	139029	106414	1.31571e+06	135418
6422	CN	65.9	Female	5705.06	6498.78	9257.04	100963	105115	125249	205827	1.64625e+06	200002
6224	CN	75.9	Female	2738.4	7204.44	4135.29	82883.1	88220.7	128467	93609.4	1.23295e+06	116784
4396	CN	78.5	Female	4135.62	7035.29	7837.25	111880	73199.8	128161	133148	1.4121e+06	156972
139	DEM	65.9	Female	3526.9	7510.94	14268.9	90342.6	106875	134477	132755	1.64789e+06	209871
5265	CN	75.1	Female	3789.65	5558.7	5171.41	84647.2	86742.8	114638	116371	1.20925e+06	120685
2167	MCI	80.7	Male	2968.51	8360.04	9985.43	128443	118400	153399	155591	1.65541e+06	165575
751	CN	71	Male	4265.48	7501.85	7763.08	100846	89408.3	120595	107095	1.63706e+06	128601
2357	MCI	71.7	Male	4288.14	6772.16	5846.24	87124.9	75676.9	130707	91543.9	1.29864e+06	128956
1097	MCI	73.1	Male	4010.5	6403.29	13329.4	97856.5	93139.5	130433	135463	1.61887e+06	190438
507	MCI	55.2	Female	4486.6	5760.93	11150.6	89035.4	89971.5	110698	98721.9	1.44563e+06	153819
6572	CN	67.9	Female	2991.96	5584.57	7821.58	118550	112972	209102	122916	1.61093e+06	183009
4075	CN	73.4	Male	3206.82	5680.13	6677.24	73105.4	109542	108474	94946.8	1.25184e+06	136358
2042	MCI	69.6	Male	4580.47	5175.04	5019.66	109259	102039	134938	88839.1	1.06199e+06	104828
4938	DEM	71	Male	2670.58	6600.97	7981.02	97126.6	89967.3	135842	86144.4	1.37219e+06	159021
6228	CN	75.1	Female	3605.91	6470.07	6995.35	84856.4	89271.5	109334	197696	1.90646e+06	150930
2073	MCI	63.4	Female		1567.96	11307.1	178412	91906.3	182072	128150	1.52228e+06	202787
4835	CN	79.3	Male		3367.15	9029.97	162659	70788.1	172986	102384	1.1366e+06	188626
2380	MCI	67.8	Male		1202.01	8863.11	165816	74867.4	174101	83751.4	1.28851e+06	168969
2150	MCI	72.7	Male		2174.73	9379.04	143677	71975.6	210094	112093	1.07701e+06	175360
1380	MCI	84.7	Male		1931.42	7862.01	131280	56065.2	226015	77129.4	1.04202e+06	150376
4940	DEM	89.3	Male		1323.99	9257.57	166543	97824.6	189262	98893.2	1.1819e+06	188845
4220	MCI	71.2	Female		2678.82	12740.7	174874	73200.3	200634	141344	1.32262e+06	196373
6179	DEM	79.4	Male		2220.43	11574.2	210278	80650.6	165856	100562	1.17857e+06	199928
257	CN	78.6	Female		2762.99	9738.47	167303	73259.6	169705	171738	1.26643e+06	150177
4590	MCI	60.3	Female		2365.79	11958.9	283639	105104	206201	198198	2.07871e+06	235993
4784	MCI	81.6	Female		2177.91	11127.3	166190	91243.6	162438	104296	1.28079e+06	190545
4477	DEM	82.2	Female		2416.12	14958.6	182613	85777.2	178138	110487	1.40421e+06	194576
1253	DEM	62.6	Female		3143.37	19402.6	170711	69700.2	206625	133096	1.66518e+06	239104
4357	CN	73.7	Female		1606.01	9157.67	160589	80696.7	182097	90537.8	1.12075e+06	177932
505	MCI	79.8	Male		1072.12	8634.68	185307	88914.8	183997	97491.8	1.30203e+06	220005
186	CN	80.4	Female		2139.31	9252.81	175045	95899.4	205488	118476	1.45636e+06	205233
6068	MCI	75.8	Male		1825.73	13179.5	184001	83279.8	214028	105358	1.58119e+06	223992
6236	MCI	83	Male	2568.89		8635.33	81132.3	79253.7	142322	92434.4	881402	149355
2183	MCI	83.1	Male	3245.2		10547.4	85187.5	123597	155586	85862.4	995360	132036
4643	CN	65.1	Female	1952.4		10619.8	93556.4	106413	142134	146910	933631	171418
6001	CN	72	Female	2935.89		12576	98234.3	92163.5	165716	95382	859888	185888
851	MCI	72.6	Female	2945.77		10165.8	85459.2	113084	160513	117889	819959	144848
6551	CN	72.8	Female	1380.54		10982.9	108688	144073	146671	148112	1.18507e+06	125874
4777	MCI	84.8	Female	4473.97		9907.03	101736	107430	130429	113561	1.04435e+06	182064
4496	CN	76.1	Female	2946.05		12249.9	108599	132577	175237	221257	1.29616e+06	191624
4434	MCI	66.6	Male	3103.26		5456.88	77708.3	87317.3	121683	75332.2	694864	101394
4388	CN	66.9	Male	4426.45		8515.9	99748.4	92655.8	129335	98648.6	938113	124309
454	CN	81.9	Female	3577.29		14231.1	112959	128452	157771	127013	1.02225e+06	180266
5283	CN	73	Female	3365.34		8314.23	89367.9	111715	132382	146063	956143	152943
1044	DEM	65.6	Male	2558.65		20257.7	115279	111797	132712	143751	925467	157086
547	DEM	75.6	Male	2402.75		7531.42	68415.2	100372	143537	99446.2	685510	116191
4645	CN	76.4	Female	3900.99		9901.44	115115	123331	155701	118738	1.05803e+06	134410
1144	DEM	77.5	Male	3361.92		12958.2	75427.1	87998.8	125558	96508.6	808869	162039
4421	CN	75.1	Female	2222.91		11041.5	104821	74755.9	147643	138905	992219	124743
51	MCI	66.5	Male	1210.22	645.643	6663.12	45507.9	77942.5	165523	150841	1.23327e+06	140239
190	DEM	78.8	Male	861.549	802.632	5552.08	51091	104792	136500	166301	1.3385e+06	157189
891	DEM	79.4	Female	1462.19	402.285	7266.98	44374.4	87566.5	148034	121159	1.37099e+06	146775
4661	MCI	73.7	Male	1272.11	854.487	6561.15	34495.6	76117.9	163834	168325	1.20908e+06	166489
4271	MCI	61.9	Male	2689.95	907.881	6297.82	48041.6	86512.9	166766	163608	1.45027e+06	145721
4303	MCI	80.2	Female	1393.12	385.891	7915.1	45056.5	83596.8	141610	155116	1.33953e+06	146976
4659	MCI	85.9	Male	747.035	951.444	4004.67	39617.3	87311	155666	173987	1.29943e+06	156138
331	MCI	64.6	Female	2469.02	876.228	7441.37	39850.3	115260	211342	329862	1.85684e+06	216238
6151	CN	65.1	Male	1444.44	1020.48	4661.37	34110.8	85545	197325	117221	1.1011e+06	171533
2063	MCI	68.3	Male	391.453	304.404	7202.83	41137.1	95016	188336	123041	1.3582e+06	143902
4195	DEM	62.3	Male	841.977	400.708	9362.13	47138.6	86874.2	153996	176209	1.22736e+06	181027
4122	MCI	66.9	Male	2161	1210.4	9856.17	45320.6	95778.2	188557	180076	1.40617e+06	171598
1281	DEM	77.7	Female	1799.9	534.73	9189.34	40634.6	92724.6	151575	214382	1.58871e+06	203520
6133	CN	69.4	Female	970.583	766.76	5506.17	41222	61583.7	160290	193833	1.23407e+06	132923
4035	MCI	72.7	Female	1013.03	1213.03	10156.5	46555.3	99230.8	169092	142888	1.22976e+06	180167
6049	CN	73	Female	1290.39	620.31	6509.74	36726.7	66543.9	153343	142390	1.18868e+06	161060
4897	MCI	75.9	Female	666.231	338.966	4859.85	37826.7	81772.2	164478	137844	1.08613e+06	158741
4262	CN	72.9	Female			7429.55	107750	107526	196419	111285	1.24661e+06	106473
2245	MCI	57	Female			4661.09	80224	79936	191869	115376	1.70671e+06	151996
4774	DEM	85.8	Male			11846.9	80778	92447.5	183302	109325	1.27413e+06	110968
1169	CN	72.2	Female			6605.25	75387.3	76007.9	176158	109075	1.34143e+06	105597
778	CN	72.5	Male			5423.53	116952	96619.6	161872	108953	1.23498e+06	119333
2079	MCI	65.6	Male			9196.94	92226.6	94840	195296	152668	1.43206e+06	112047
2248	MCI	76.1	Male			9674.35	89859.3	98493.8	170822	119583	1.36259e+06	124121
4114	MCI	55.1	Female			8491.99	86844.2	95515.9	210966	148791	1.52637e+06	111915
6604	MCI	85.4	Male			8221.74	88382.8	85253.5	182377	96980	1.2655e+06	107025
6454	CN	72.4	Female			10651.8	96581.5	108537	194205	106541	1.44956e+06	125152
4149	MCI	73.3	Male			10702.3	80710	76340.5	158064	131344	1.61024e+06	106823
4401	CN	67.5	Female			8134.8	76320.7	91156.8	185140	164046	1.81405e+06	111584
2182	MCI	65.5	Male			5167.55	66281.3	79884.7	151528	73248.4	988985	81788.4
6499	CN	69.5	Female			8039.8	91070.3	103371	160104	109627	1.47702e+06	110142
520	CN	77.7	Female			6090.5	111036	120698	180970	129006	1.98092e+06	122239
6546	CN	80.4	Female			4496.48	77780	73542.1	162258	110826	1.37007e+06	115757
4072	MCI	62.4	Female			5695.36	74363.3	105667	180339	245162	2.22092e+06	114400
6320	CN	65.4	Female	418.433	2068.13	7034.36	78731.7	119559	133742	179760	1.08852e+06	112603
4189	MCI	73.1	Female	1077.25	1236.34	5771.05	81411.6	109451	129927	180502	986757	101652
4034	MCI	72.2	Female	914.905	1038.57	8610.44	78517.2	129010	154235	199428	1.4179e+06	166059
4014	CN	80.7	Male	688.94	1867.43	7800.38	77085.9	84928.4	130699	116842	779799	83855.3
6164	CN	68.9	Female	626.078	978.362	5407.46	76814	87893.2	113501	133864	1.07934e+06	96572.4
6581	CN	74.5	Female	302.904	1519.32	6843.23	95720.5	103882	127442	229785	1.53945e+06	132172
4402	MCI	72.9	Female	577.908	2713.43	8698.46	89520.1	101943	131995	188038	1.17662e+06	141413
4026	CN	73.5	Male	447.785	1356.2	4319.24	85667.6	95050.5	123761	131846	832633	103951
4728	DEM	81.9	Male	422.357	1301.31	5220.85	69344.9	93848.2	109173	104430	760020	72397.1
4104	CN	72.5	Male	1031.97	1747.49	7460.52	78742	104960	141914	156671	1.03315e+06	92839
4466	CN	79.8	Male	700.717	1433.57	6571.24	110395	109221	119783	190495	1.29053e+06	101281
4177	CN	85	Male	599.212	2204.98	6068.97	74601.6	112150	124651	180641	922553	104069
4229	MCI	66.4	Male	1098.77	1110.8	3238.89	76135.5	68849.1	125173	134985	1.04528e+06	88397.9
1081	DEM	84.6	Male	521.352	826.974	6851.03	75649.6	110136	117624	114434	737525	86024.4
6312	MCI	80.3	Male	637.227	1110.09	8021.86	89898.9	109214	143998	146825	1.24814e+06	116419
4764	MCI	82.7	Female	337.533	743.867	5750.18	73708.6	113125	112900	132180	911718	102619
4646	MCI	60.8	Female	1264.24	2253.68	7597.51	68629.3	112720	138732	251531	1.64085e+06	115184
91	DEM	62.4	Male			3973.01	45158.8	48124.9	154395	97405.8	1.119e+06	115996
4393	CN	73.5	Male			4546.32	56163.8	47360.6	205167	228893	1.43303e+06	169893
4566	CN	83.5	Female			3849.93	61592.7	53910.9	157647	155164	1.25923e+06	129728
4631	MCI	69.5	Male			3508.14	61146.5	56311.9	167852	141303	1.06084e+06	119362
4365	CN	80.4	Male			2039.32	54520.4	44126.2	151456	105074	1.01696e+06	102260
4332	MCI	69.1	Male			3246.29	60470.5	54530.6	147876	127619	1.07782e+06	129648
567	MCI	73.7	Male			4561.34	72249.6	71274	146559	157511	1.76576e+06	140866
6429	CN	68.8	Female			2677.17	54422	59640.2	161475	125448	1.14742e+06	105341
843	CN	70.6	Male			1902.71	56829.4	47622.6	140381	69384.7	967884	100685
6185	CN	82.7	Male			3902.69	56314.1	52677.3	172039	124153	1.44735e+06	125701
4730	DEM	81.1	Female			2577.82	53551.2	49595.2	149890	110873	1.0437e+06	102657
4127	MCI	63.1	Female			3664.26	65173.3	55589.9	148674	114093	1.301e+06	113709
4067	MCI	65	Male			2717.35	52010.1	44586.9	131936	77900.6	970634	90358.4
4200	CN	70.2	Female			2457.85	53457.3	51934.8	140468	113792	1.01852e+06	93398.6
602	CN	70.8	Male			3273.82	54307.9	58699.3	143786	117314	995614	110090
4215	DEM	81.6	Male			2762.66	52553.6	52698.3	148636	137812	993514	116522
4945	MCI	56.5	Male			3913.58	47145.5	44683	142266	97015.2	846177	95930.7
5028	DEM	61.9	Male	6493.15	1433.54	6300.08	85360.2	95611.9	167396	92251.6	1.21362e+06	137261
2394	MCI	67.5	Male	4346.82	976.353	5360.65	99764	88260.4	159445	112410	1.4529e+06	135227
739	MCI	82.9	Male	6950.04	1700.43	5459.07	139703	96944.4	153579	122483	1.56432e+06	163021
5154	CN	72.4	Female	5124.21	927.186	3322.64	92972.4	101712	139372	97793.5	1.32177e+06	116584
954	MCI	69.4	Female	4855.4	1924.66	4243.76	125818	95138.8	169795	71549	922314	134909
97	CN	72.8	Female	5788.91	1106.2	5467.36	109132	104677	158556	97767.2	1.25263e+06	136673
4032	CN	70.2	Female	4742.66	725.472	2570.66	105905	93492.1	163828	119549	1.33819e+06	143908
4900	CN	59.8	Female	5077.09	1074.23	3543.43	94055.2	86955.9	172582	107008	1.39984e+06	137503
4103	CN	71	Male	4199.28	765.701	2918.39	80104.5	96604.4	167426	94844	1.27992e+06	148533
1265	MCI	82.2	Female	3464.5	2447.01	7649.85	115123	104801	200566	144390	1.6537e+06	160783
4453	CN	65.9	Male	5035.94	676.086	3227	87674.2	110984	160593	118860	1.22796e+06	151282
852	DEM	84.3	Female	4696.27	2763.92	7387.38	112509	95828.1	159288	125708	1.46997e+06	165483
3	DEM	81.3	Male	5004.06	397.729	2672.61	96111.4	97475.9	165303	69458.1	1.1199e+06	113029
5013	DEM	68.4	Female	5564.87	1676.92	6802.4	124018	96787	180536	191154	2.08392e+06	183877
5017	DEM	84.3	Male	4606.12	842.302	8269.08	131142	115119	178840	104991	1.61455e+06	166620
6054	CN	78.7	Female	9282.26	2687.2	3389.46	128529	90169.7	188699	76407	1.32619e+06	125943
6399	CN	64.1	Female	4985.77	1538.54	3896.93	126845	104158	197807	90237	1.92899e+06	263713
2087	MCI	69.5	Male	2375.23	6216.22	30193.1	92188.1	171819	162445	192223	991257	265912
511	MCI	57.8	Male	1361.49	5695.76	47181.4	100223	191384	155358	253142	1.45644e+06	370464
6688	MCI	78.5	Male	2306.02	6826.98	20246.2	102722	166857	162311	177391	1.14092e+06	241958
5096	CN	80.4	Male	4457.34	7210.11	26626	118002	195411	172476	191142	1.32276e+06	326935
4598	CN	65.1	Female	1395.96	8389.7	26110.1	68570	158727	178447	215457	1.07783e+06	274800
731	CN	71.5	Male	2759.95	4899.32	29222.9	114887	219047	203832	342267	1.62068e+06	291906
6402	MCI	79.7	Male	1801.64	6735.28	33775.2	133105	168915	173748	278720	1.5735e+06	399060
6034	MCI	63.9	Female	2551.55	5661.96	58828.3	139553	181538	183731	276967	1.3269e+06	362241
1225	MCI	76.4	Male	3081.01	7402.34	27828	139772	233436	130417	244475	1.12306e+06	260297
4198	CN	78.4	Female	2812.37	3950.53	24787.9	112897	162569	181657	324532	1.25651e+06	300076
173	CN	73.2	Male	1469.01	4816.88	23722.6	84961.2	188803	165006	203935	1.09499e+06	249914
2193	MCI	75.5	Male	2723.74	6314.34	21445	125325	150892	144618	255215	1.40117e+06	265691
4714	MCI	64.5	Female	3335.94	4848.25	33118.9	111385	174187	183568	266673	1.22899e+06	241758
5261	CN	78.1	Female	2845.73	4522.83	21802.4	106872	173293	172697	226162	1.22092e+06	233688
4073	MCI	76.3	Male	1631.47	5378.12	19186.7	88635	201230	176732	155535	995110	243191
6788	MCI	69.7	Male	2518.76	5788.72	39240.5	99394	162911	173570	184485	882279	241047
2018	MCI	76.5	Female	1450.33	4299.59	21899.4	109397	219564	162905	275862	1.70372e+06	284829
2148	MCI	67.8	Female	5336.82	1828.09	12747.3	162811	169333	159658	295132	1.79184e+06	152731
4499	CN	83.8	Male	9018.35	1539.87	11253.4	114726	135775	157743	216137	1.27792e+06	128146
4009	DEM	90.3	Male	4290.69	1225.67	14274.7	112316	153919	156941	191327	1.54862e+06	125878
4213	CN	78.1	Female	5291.9	1724.55	16182	163925	168609	147073	278125	1.8862e+06	135023
4909	MCI	78.3	Female	5112.68	2678.32	22556.2	244288	183087	138518	379566	1.94439e+06	154433
2190	MCI	82.4	Male	5133.21	926.16	18922.3	147565	130806	166687	229698	1.8249e+06	142677
4917	MCI	75	Male	6835.05	2779.95	16170.1	158627	157027	157794	305267	1.90456e+06	158476
4964	DEM	81	Male	5429.98	1033.83	22400.4	190032	156607	155011	395386	1.98076e+06	188220
4469	CN	66.1	Male	3504.18	1868.55	18585.4	126882	130760	177301	328166	1.69581e+06	139579
4171	MCI	69.4	Male	4735.85	2600.18	21314.6	171979	174248	180905	376824	1.66725e+06	183069
6668	MCI	75.6	Female	3573.33	2076.88	28793.4	200790	203649	178284	399176	2.24998e+06	182764
5027	DEM	75.6	Male	7649.05	1100.14	17831.9	135666	131071	168487	179979	1.40259e+06	98787.4
1321	MCI	83.2	Male	4754.74	1255.31	17656.3	170523	169509	162458	257470	1.56942e+06	121861
1247	MCI	72.6	Female	4329.08	1543.17	23886.4	155882	152146	149085	301659	1.81809e+06	166235
374	DEM	76	Female	5135.57	755.876	17132.1	191792	148140	172244	231405	1.65582e+06	129259
4256	MCI	62.8	Female	2902.58	2059.25	20761.9	160277	133457	153226	284828	1.97957e+06	163031
33	MCI	83.4	Male	4768.21	1318.9	18088.3	170464	156594	159342	263327	2.03586e+06	154267
256	MCI	70.1	Male	7345.92	1414.68	2054.25	129738	77879.1	172013	94905.6	1.0549e+06	106116
441	CN	72.7	Female	5484.23	1177.57	2406.89	145196	67918.1	168947	171245	1.2302e+06	104638
4059	MCI	72	Male	5310.01	1036.41	808.664	125155	63375.9	153871	106613	1.00199e+06	86196
5277	CN	71.9	Female	7085.1	1065.55	1538.87	112808	74551.7	199692	220142	1.27988e+06	88529
5091	CN	68	Male	5441.05	1148.03	2856.62	125756	83647.3	188530	164731	1.33332e+06	108820
5119	DEM	77.1	Female	6018.28	1972.57	5898.5	195110	69902.6	171340	199370	1.41496e+06	161321
2373	MCI	79.1	Female	5546.67	1299.12	2970.51	118393	85696.7	207855	174342	1.09221e+06	119639
5113	CN	65.1	Male	6641.68	1331.12	639.116	117297	76922.7	227065	149469	1.03756e+06	110081
1203	CN	83.4	Male	7155.04	634.48	2312.46	119034	86426.7	170763	176129	1.21248e+06	111570
6326	MCI	75.8	Male	2962.07	498.684	1746.8	155853	80191.9	192849	177685	1.54909e+06	106536
6309	CN	65.2	Female	6806.21	384.652	1413.31	113658	72478.2	198787	155954	1.23063e+06	106402
4796	MCI	72.6	Female	4478.93	1340.78	1934.13	195626	98247.4	214404	181676	1.05207e+06	95711.2
4007	MCI	78.1	Male	6426.72	1192.15	2103.42	159282	72498.2	181061	127800	1.11164e+06	92767.9
4767	MCI	66.4	Female	5105.04	533.813	1469.75	116887	70137	197747	154083	1.2138e+06	98234.5
1126	MCI	80.5	Male	7972.05	1019.69	1080.85	107609	106482	166355	141284	1.15662e+06	102514
2247	MCI	65.2	Male	4990.79	149.409	696.323	112173	84241.4	181286	185282	1.33618e+06	98500.4
4022	MCI	86.4	Male	4974.49	781.214	1743.27	109364	70322.4	221971	85577.2	862019	85086.6
4508	CN	77.2	Female	1990.17	394.692	8195.36	217549	93900.8	115108	182417	1.24343e+06	86001
259	CN	70.6	Male	919.163	453.885	9239.44	187159	105084	109694	140908	1.22475e+06	94923.4
754	DEM	67.7	Female	2021.79	798.902	7853.5	204289	105647	100825	160226	1.09846e+06	82764.5
5271	CN	80.5	Male	1336.17	527.272	8456.25	169375	116725	116744	185366	1.08261e+06	92606.3
6047	MCI	71.1	Female	2089.07	611.962	6816.58	161097	74980.7	101561	131323	1.05742e+06	85371.6
565	DEM	74.7	Male	2393.09	812.038	8656.36	191984	97812.4	98727.1	165183	1.24011e+06	91899.8
4750	MCI	83.8	Female	2125.02	600.569	7442.29	141459	89372.9	91232.7	123946	879815	83160.7
1041	DEM	70.9	Male	883.848	387.276	8002.08	160988	94168.2	163146	342030	1.27016e+06	96181.3
866	CN	80.1	Female	1054.32	311.292	11046.6	200183	127089	110524	149084	1.04303e+06	94989.5
4004	MCI	66.8	Female	2141.45	423.528	10020.9	161845	98910.3	127611	167273	1.26439e+06	119506
4896	MCI	68.2	Male	1198.45	283.763	7357.28	120311	90205.4	124355	119742	829090	74070.5
314	MCI	72.2	Male	2161.86	981.976	10225.3	187919	114521	100084	195582	1.18935e+06	107634
4494	DEM	71.1	Male	1851.7	404.01	9048.75	148900	78072.5	113258	98100.9	853430	87886.9
1268	MCI	82.7	Male	1338.77	295.722	8064.55	209050	132152	114899	147913	1.44923e+06	79561.8
1292	MCI	76.3	Male	2183.73	964.29	15145.6	236642	105661	130926	191296	1.35479e+06	149447
6059	CN	64.9	Female	1256.99	751.745	9842.1	170392	102030	140055	246215	1.40916e+06	103430
4240	MCI	70.9	Male	2932.66	498.008	8400.98	152734	103673	130671	150410	1.2981e+06	97668.7
4587	CN	65.8	Female	2346.32		934.133	127850	48053.9	102777	126998	1.05706e+06	100112
4390	MCI	76.2	Female	824.16		867.447	100766	57540.9	97451.4	96279.2	835652	72787.3
6871	MCI	68.1	Female	895.689		4132.48	120348	63507	129223	146916	1.13119e+06	98924.3
6058	CN	68.3	Female	2338.04		1899.32	111051	66036.2	123464	136603	1.32595e+06	98260.2
260	CN	78.7	Female	1029.6		1332.42	101632	69057.9	87129.9	151985	1.21848e+06	93763.4
1055	DEM	84.7	Male	1789.84		1215.58	134274	58927.5	97857.1	93420.6	1.02173e+06	102920
6927	DEM	59.5	Female	2063.43		3813.67	143628	64020.4	101079	137914	1.06941e+06	115385
6014	CN	67.1	Male	1132.7		1110.12	96882.9	62863.2	86115.2	81951.6	998245	68130.1
725	MCI	81	Male	1828.8		2201.91	146222	68809.6	114131	142150	1.26917e+06	121533
4473	MCI	74.8	Male	1553.89		1293.5	91097.8	58490.5	86069.5	89282.8	758081	82777.3
2347	MCI	71.1	Male	1100.07		555.8	103167	72358.9	113693	179406	1.14029e+06	113452
6292	CN	76.7	Male	936.274		1374.69	122132	57059.1	113068	95956	895445	93097.6
6515	CN	90	Female	810.268		3021.93	152604	59121.1	110879	94823.8	1.0933e+06	79555.2
4713	MCI	70.6	Male	2588.33		3606.39	125396	57541.9	111183	169412	1.44522e+06	127279
2002	MCI	64.9	Male	1789.65		1192.09	90763.2	66531.3	114288	90887.4	814140	84008.7
1117	MCI	69	Female	326.437		1187.9	97436.5	65869.1	116662	156682	1.25471e+06	103141
2151	MCI	70.6	Male	773.429		249.216	87421.9	66242.1	105594	122975	1.10585e+06	105026
4720	MCI	77.5	Male			1917.68	75670.1	83478.6	145776	117759	1.25333e+06	103915
10	DEM	73.9	Female			1675.5	122122	130614	147811	151014	1.31816e+06	123248
2130	MCI	76.4	Male			2277.01	114857	78512.9	152684	86016.6	1.11058e+06	92317.4
720	DEM	77.4	Female			2326.93	91689.5	108015	179837	116761	1.21372e+06	135456
4806	MCI	55.9	Male			1101.67	73723.1	90889.9	140562	87410.1	1.03899e+06	109170
344	MCI	78.8	Male			2240.52	101960	92758	148163	89599.5	1.02387e+06	100241
6025	CN	79.7	Female			877.216	70427.2	93219.6	166608	76138	1.09543e+06	94012.6
783	MCI	79.2	Female			2770.4	125654	114190	169087	109739	1.13507e+06	129397
4037	CN	75.7	Male			2971.77	121891	101918	164723	120589	3.11302e+06	120572
2185	MCI	73	Male			2134.71	57309.5	66257.8	160557	78587.2	923207	111309
5289	CN	59.8	Female			3064.16	83573.7	96887.6	143409	133750	1.37121e+06	118966
4815	MCI	69.8	Female			3134.29	94735.6	89842.6	173796	148407	1.50547e+06	119598
478	MCI	56.1	Male			1592.19	84672.5	88023.3	168033	148076	1.18176e+06	109614
35	CN	76.9	Male			1850.84	98091.2	96014.1	144313	75061.1	1.10944e+06	139937
4679	MCI	69.1	Male			2585	80713.2	118019	166108	250159	1.3935e+06	150097
4624	MCI	77.6	Female			3858.78	135616	92394.9	162394	141577	1.17035e+06	133722
4485	CN	73.3	Male			1512.39	114759	105861	148224	162129	1.34298e+06	124962
4291	CN	75.5	Female	2242.92	4674.48	10595.1	203549	215495	231979	228763	2.02397e+06	217079
855	MCI	75.7	Male	899.659	5516.07	17862.1	223720	230001	283537	214924	1.61814e+06	162060
5278	CN	80.3	Male	1745.66	3404.72	10100.3	129199	186242	250675	149367	1.87988e+06	210444
4447	MCI	67.6	Female	1597.64	5706.78	16780	164350	218976	265261	373767	2.37311e+06	220268
423	MCI	79.4	Male	2263	2493.73	13970.5	250831	174500	245050	201769	1.89928e+06	226900
269	MCI	67.1	Male	2654.71	4245.92	18243.9	172279	164029	210355	228077	1.87709e+06	235425
5169	CN	65.7	Female	1716.26	3251.79	7007.36	195227	162214	227574	124949	1.37467e+06	126729
1170	DEM	73	Male	2980.37	3353.89	12019.7	141368	159289	222358	161612	1.314e+06	198486
172	CN	70.6	Female	1518.23	4081.86	8773.31	132589	156081	254816	250353	1.97284e+06	209565
4366	MCI	73.6	Male	1337.17	4041.27	15837.4	245307	191522	236258	209580	2.12333e+06	274405
5097	CN	67.6	Male	1401.42	3729.04	9961.19	147082	144847	276862	143503	1.31654e+06	178568
4989	MCI	60.2	Female	573.846	3229.19	8481.74	157398	147514	227554	239569	2.08711e+06	198850
818	CN	74	Female	661.489	4296.9	7978.49	155579	170192	269014	142838	1.5707e+06	169474
4817	MCI	60.7	Male	1521.41	4040.47	4659.42	111780	141842	231953	116818	1.40186e+06	132044
4929	MCI	75.7	Female	1657.24	4974.65	17966.1	254076	233164	276690	278417	2.4064e+06	277597
5259	CN	78.9	Female	1308.87	2574.66	5760.29	133512	164448	224707	143391	1.37535e+06	129900
4638	CN	74.1	Male	1981.4	3809.03	6713.91	121519	149615	259587	155667	1.61095e+06	139075
6370	MCI	69.9	Female	5071.92	1410.91	13186	209884	252765	175523	330847	3.90893e+06	172503
4571	MCI	60.6	Male	3906.13	816.881	9148.37	157810	225984	214011	394941	1.51371e+06	180738
2307	MCI	78.6	Female	4538.6	1469.91	9952.33	160802	227587	155803	231149	1.45845e+06	164901
5296	CN	69.3	Male	4879.63	2581.93	9201.9	178628	207382	194903	277111	1.38798e+06	165157
4898	MCI	75.2	Male	5099.51	2394.71	6219.19	169242	198012	164981	298462	1.72665e+06	154934
1224	MCI	81.1	Male	5507.76	1759.83	7364.94	175837	201218	165138	215333	1.43457e+06	144168
578	CN	77	Female	7368.04	2282.34	12305.8	194064	288944	173915	357330	1.80895e+06	166516
2219	MCI	74.3	Male	3441.13	1746.18	8283.23	150991	229062	227775	327580	1.35973e+06	178477
481	MCI	84.9	Male	3495.71	1725.5	10380	151513	211304	200711	200337	1.42564e+06	127174
5	CN	73.7	Male	9736.82	2508.37	8015.76	192183	220569	183890	210142	1.18558e+06	143943
2208	MCI	68.9	Male	3248.99	1539.65	7998.67	179998	224356	159299	239468	1.25612e+06	170914
6024	CN	67.4	Female	5029.6	2805.58	10124.4	166541	216870	221972	325788	1.67387e+06	207799
47	CN	84.8	Male	5020.96	967.053	7471.53	205445	229065	142030	226368	1.27089e+06	138315
4061	MCI	64.2	Female	4403.02	923.934	7094.47	184632	219364	183871	320408	1.6831e+06	189073
5038	DEM	81.5	Male	8220.38	2353.11	3534.53	146211	185920	150129	240575	1.37138e+06	108913
4192	DEM	82.3	Male	4276.35	3085.39	9923.9	210543	187668	171908	255699	1.33381e+06	181960
4842	MCI	73.1	Female	3730.74	3103.38	6185.92	183642	169682	181516	299140	2.11376e+06	177833
2171	MCI	65.3	Female	4946.03	383.837	2071.4	113964	103694	120599	130042	1.19041e+06	143098
4501	DEM	79	Male	1685.27	1067.3	1947.48	112405	132933	107246	100595	977286	122202
4904	MCI	65.8	Female	3248.85	1555.12	951.249	72712.2	96589	117318	93734.8	1.11577e+06	126309
4522	MCI	66.8	Male	2392.11	1724.26	796.181	94300.6	110359	110488	82155.7	963579	116653
4351	MCI	67.8	Female	3710.94	1109.53	2764.41	90251.9	104697	133146	109187	1.04825e+06	107014
4613	MCI	67.9	Male	2990.16	217.731	607.52	82375.2	80980.2	121156	84144.7	680995	107223
931	CN	86.1	Female	6249.71	1868.94	299.755	85081.3	93799.7	146937	68341.1	699528	126384
417	MCI	79.8	Male	3118.81	1520.25	1652.94	103433	101736	109333	80977.2	830571	118110
222	MCI	85.9	Male	3834.22	1637.94	601.572	74977.5	99305.9	116451	72920.9	803893	116779
6019	CN	81.7	Male	3952.5	1925.92	1712.55	121748	122603	132535	120181	1.27161e+06	143629
4272	MCI	70.9	Male	3738.66	1029.85	851.544	77899.1	105888	108931	75756.5	1.01655e+06	109728
4762	CN	73.8	Male	6206.26	791.996	1318.24	87133.3	85405.3	112900	79844.3	970193	112619
1109	DEM	77.8	Female	2701.27	1612.7	2833.79	105932	96060.9	141088	96302.5	1.21548e+06	127975
6104	CN	69	Male	1415.15	537.274	1282.48	89877	95606.5	129794	103384	927904	111939
6255	CN	75.3	Female	4591.75	1217.61	2266.21	166661	115210	131489	163601	1.31934e+06	166426
2392	MCI	64.4	Female	2481.78	707.536	1326.26	74173.8	88701.3	116908	66266.2	886695	120400
4350	CN	72.9	Male	4009.33	1024.41	1544.39	82503.6	98251	109246	128231	1.00906e+06	126030
5202	CN	65.7	Female	129613		102281	1.27151e+06	116096	121403	59663.2	1.17527e+06	376879
498	CN	70.4	Male	13605.6	1274.78	25185.2	207252	83749	124204	113713	1.00092e+06	148550
1033	MCI	73.3	Female	15466.4	1167.97	24329.1	276128	116996	94181.6	96239.6	1.27477e+06	160933
1090	DEM	71.4	Male	11574.5	748.037	28356.1	211526	79510.9	114723	77443.9	893104	144511
4595	MCI	76.6	Male	10550.7	638.178	27440.2	155301	82492.9	119012	72374.9	857205	118639
4711	MCI	74.9	Female	12740.5	1124.36	23634.1	185174	100402	128428	98185.2	1.00572e+06	124323
4367	CN	65.2	Female	15946.9	1014.07	28682.4	193977	101141	121790	78081.3	905785	142616
4462	MCI	71.4	Male	11494.8	786.024	19720.6	186796	93099.2	104889	83970.1	902129	140654
4282	DEM	89.6	Male	9500.78	244.592	20398	124531	92829.8	116150	73623.4	790658	115300
4911	DEM	74.5	Male	10715.7	592.245	16318.9	175949	74275.6	102693	68412.1	762272	101233
4205	MCI	81.4	Female	11843.2	248.347	26253.7	151990	89612.8	106079	86808.8	1.03703e+06	122125
126	MCI	77.6	Female	11055.9	438.073	20186.5	180284	75597.5	109601	80533	933328	130367
1016	CN	78.4	Female	17769.5	483.493	31634.5	261742	129039	157138	200218	1.33943e+06	137742
2210	MCI	79.9	Female	8520.33	696.277	15418.6	120150	49074.8	106933	46160.8	579148	96648
4431	MCI	74.2	Male	2143.88	245.908	16617.5	119372	75105.2	123325	102603	992628	124642
697	MCI	86.8	Male	13146.5	1063.98	24641.1	198278	81157.3	126552	98712.8	1.043e+06	175795
5234	CN	78.7	Female	2238.37	421.428	12677.4	88724.2	72220.2	105801	52236.1	736694	77798.7
401	MCI	63.9	Male	1145.25	638.264	14799.4	72328.6	120851	87582.4	155636	825109	137543
972	CN	77.9	Male	1723.45	503.478	15660.9	80108.2	112242	85675.7	210506	754985	129592
981	CN	84.3	Female	2722.6	500.367	24299.4	104707	119039	118648	206130	1.08714e+06	193918
2381	MCI	69.2	Male	2915.18	881.959	22431.5	76109.3	110143	111470	241816	1.0485e+06	177362
4813	MCI	67.6	Male	2270.92	275.252	13966.8	62815.9	102897	108133	157809	926860	165026
5129	CN	74.5	Female	2964.34	409.537	21146.5	87202	136799	113192	238787	1.04255e+06	178404
6378	MCI	69.2	Male	1752.16	407.468	13371.8	79095.3	72993.9	92118.9	99139.6	625515	107578
4635	MCI	72.7	Female	1805.47	754.56	19559.5	93516.1	111297	109944	175632	946666	161117
2093	MCI	59.5	Female	1949.25	191.54	18865	83837.8	83390.8	121712	199651	913899	136684
5100	CN	71.2	Male	2440.02	354.381	15831.9	77588.3	65992.2	101393	149737	797205	127439
2074	MCI	62	Male	821.954	695.865	16649.3	66212.2	84339.7	112427	130182	748460	134116
4825	MCI	71.9	Male	2889.26	519.117	13421	95626.8	87324.4	94925.1	156435	728704	124391
6266	CN	66.1	Female	2139.7	911.319	18574.2	104444	82956.5	99344.6	207882	1.24621e+06	178276
295	CN	84.8	Male	1819.98	331.867	16689.6	72315.4	97141.1	97388.3	141124	716815	124588
41	MCI	71	Female	3146.3		19947.9	95015.9	92160.3	97179	198747	1.04285e+06	164602
644	MCI	75.1	Male	2725.45	375.579	12699.7	70491	75610.1	102339	98917.1	746928	104366
1379	DEM	87.8	Male	1569.55	701.446	18402.5	96076.5	105968	93947.2	113462	744870	139701
6200	CN	72.3	Male			9537.74	133512	100194	87326	91834.2	836135	57417.6
5214	CN	69.6	Female			6230.42	93648.6	63100.4	76383.5	64645	652382	42736.6
1402	DEM	69.4	Male			12790.2	136548	117388	86676.1	190194	899734	69566.2
4377	MCI	69.4	Female			8235.15	126629	84509.1	88355.6	122296	911419	71323.5
4105	CN	70.8	Female			6867.04	120050	95141.7	83294.9	67817.8	666549	55014.7
5153	CN	79	Male			8556.22	109877	72570	82303.8	95508.6	739732	64574.9
5123	DEM	73.5	Female			12147.7	147916	97874.2	91067.8	137013	969607	81611.8
4783	DEM	83.2	Male			9188.09	89482.2	89317.4	92776.6	86894.3	690104	59182.3
4443	MCI	67.9	Male			6068.69	79559.1	75454.7	79085.9	80595.4	640826	60543
2374	MCI	81.3	Female			7098.5	186122	76568.9	92855.5	91440.9	704714	64631.5
4986	MCI	85.3	Male			5871.1	84039.1	67534.9	71651.3	60812.3	481832	41305.9
1269	MCI	73.5	Male			9745.73	132512	90666.1	89539.3	109702	853138	77483.7
4743	MCI	70.1	Male			9208.5	101414	82913.5	88535.2	82783.6	792522	83691.8
1137	DEM	81.6	Female			15118.7	136767	112793	82595.1	137284	962506	67182.5
4465	MCI	61.1	Female			6665.9	94384.9	110254	87081	180927	939867	70950.1
2099	MCI	83.8	Female			10614.5	72374	95243.9	98704.3	87351.6	661446	51755.6
55	CN	75.6	Male			4432.64	84636.5	61147.5	80924.9	52599.6	536613	47062.1
6314	CN	73.6	Male	1698.79	2531.26	13334.9	142247	87043.9	176485	152211	1.27623e+06	97889.5
4514	MCI	67.7	Female		561.999	14236.5	138338	78356	170720	198713	1.44566e+06	96288.8
448	MCI	85.6	Male	409.275	782.011	22433.1	176590	89922.1	181349	209548	1.34585e+06	108274
4223	DEM	75.8	Male	1054.69	1000.61	19559.1	165098	83376.8	174849	159447	1.14964e+06	122529
4012	MCI	68.9	Female	272.062	1063.44	21489.7	136755	71674.6	180002	270349	1.23734e+06	108789
5125	CN	65.2	Female	1991.38	332.423	10633.1	183088	90621.2	178037	224686	1.48827e+06	122067
722	MCI	70.1	Male	1247.81	1241.82	13678.8	122091	78279.3	175777	134762	1.02896e+06	107375
5253	CN	68.1	Male	975.856	1862.93	14941.4	142516	81137.1	171531	163167	1.23038e+06	106150
2234	MCI	63.7	Female	1445.71	2263.34	23437.9	149565	79540.7	196433	327092	1.86057e+06	143468
2403	MCI	79.2	Female	908.163	1759.8	32897.5	197147	92667.4	153273	207258	1.68414e+06	124489
6258	MCI	79.9	Male	1458.15	2926.09	16027.7	149990	79325.9	169411	262035	1.80553e+06	144165
107	MCI	60.8	Female	2811.53	2222.71	23943.6	142247	81200.8	169952	268279	1.51455e+06	129108
4076	CN	72.6	Female	3214.65	1790.7	14713.8	210879	94591.9	171707	296382	2.20913e+06	134888
4513	MCI	60.7	Male	2599.73	1275.69	9747.28	105353	65212.3	169067	95811.6	917914	150561
4360	MCI	59.5	Female	2302.73	1094.53	15465	165546	82241.9	174053	208453	1.36534e+06	123650
4173	CN	69.9	Female	2604.49	674.301	14064.3	126090	90427.9	157105	178864	1.35514e+06	122701
4689	MCI	69.6	Male	1558.71	1292.6	22177.2	149246	73834.5	162162	258363	1.42049e+06	140322
4060	CN	84.5	Male	1563.1		5108.28	160529	94688.5	137000	84315.8	919671	121159
6510	CN	67	Male	2148.39		7558.56	261431	128989	162827	186217	1.55556e+06	183059
4801	DEM	77.8	Male	1723.53		8042.98	292889	143568	144892	94474.3	1.43456e+06	163585
6002	MCI	71.8	Male	1307.65		4823.15	189622	127358	165769	92987.6	2.43589e+06	150442
2367	MCI	74.8	Male	742.141		6656.13	173779	107633	175149	89732	849944	124855
4376	CN	76.5	Female	2193.24		6911.15	2.90767e+06	130471	194603	128698	1.48403e+06	193988
4331	MCI	75.4	Female	1866.79		4414.11	249973	102058	155787	107641	1.24794e+06	143564
4339	CN	84.3	Male	3071.9		9822.11	250478	119023	154854	116621	1.14316e+06	150033
803	DEM	84.7	Female	1869.69		16233.4	348903	143557	177400	140397	1.35628e+06	224188
2225	MCI	70.5	Male	2041.6		9370.94	192312	108351	189156	120223	1.03141e+06	178450
176	MCI	74.7	Male	1588.62		8398.96	214015	122584	149081	97536.5	2.27805e+06	162041
6446	MCI	61.5	Male	1411.46		5078	187663	107061	141774	96681.7	1.03908e+06	137805
6178	CN	66	Female	1855.82		12937.4	267436	100884	161157	167805	1.48803e+06	207204
4922	MCI	76.2	Male	2835.68		9713.12	240582	114454	138803	115170	1.14874e+06	173745
1290	DEM	79.4	Female	1537.06		9545.84	197981	99276.8	158518	101750	991882	145450
4594	MCI	62.1	Male	1530.96		4853.98	163723	96928.3	166208	100726	990381	137091
2116	MCI	61.7	Male	2489.22		4609.31	167459	96942.7	134610	87898.6	1.19864e+06	147609
4250	MCI	78.5	Male		861.286	10458	107696	67277.8	140546	68294	1.08738e+06	106443
5272	CN	70	Female		1016.56	9054.51	115791	82761.1	141626	105040	1.05175e+06	130461
4894	DEM	60.7	Female		1060.33	20670.8	156664	107954	165646	96422.8	1.25536e+06	138651
4235	MCI	63.8	Male		669.949	10146.5	98013.1	67954.4	139072	67874.2	829351	127600
4084	CN	68.4	Female		659.456	13010.5	130806	98138.5	169879	122555	1.29624e+06	147186
150	MCI	73.9	Male		1055.4	10946.1	106505	121983	161392	103632	1.20604e+06	160662
1161	DEM	79.8	Male		1164.5	11328	97973.7	80895.5	175542	89462.6	1.12583e+06	139339
4300	MCI	80.6	Female		1975.86	12013.8	146570	73510.2	143552	83711.8	875098	113206
4984	DEM	73.2	Female		536.701	13787.2	115749	89963.9	125740	112158	1.28131e+06	161867
4381	MCI	55	Female		117.712	9177.27	110861	82488.1	139897	90469	1.21936e+06	146979
621	MCI	62.3	Female		866.044	13261.1	117975	84639.6	140503	111028	1.33867e+06	135113
5200	CN	76.4	Female		376.943	7676.66	127414	74871	134029	79179.8	1.3995e+06	126079
112	MCI	70.7	Male		1575.53	12621.1	166274	87627.2	164278	118608	1.36501e+06	134062
341	DEM	74	Male		1012.06	8776.51	70673.3	61742.3	167819	46505.9	832543	124067
1304	DEM	74.8	Female		457.855	13694.2	151135	100410	155702	88124.3	1.1825e+06	133358
4539	MCI	66.4	Female		2172.03	9603.01	135273	58683.2	130184	94426.2	1.00183e+06	143732
6347	DEM	86	Male		1305.86	12351.6	151929	77191.7	136622	69072.9	996209	129258
31	CN	77.8	Female	5050.71		2667.55	98292.6	109143	213827	92483.5	979057	91713.8
4565	MCI	82.4	Male	1152.68		1552.66	68319.3	73428	183742	80930.4	786747	65276.6
4029	MCI	61.1	Male	2121.55		3040.29	75077	92462	207348	135033	997100	69283.7
618	CN	74.9	Male	1829.87		1897.69	97632.7	89935.8	196138	107151	983653	90677.5
626	MCI	83.2	Male	3224.53		4848.18	141444	91869.3	199643	132186	1.34592e+06	95668
1034	MCI	75.1	Male	2544.97		2794.82	127439	100056	192182	127128	1.20233e+06	92121.5
6612	MCI	68	Female	2317.81		3951	106483	106302	241087	123487	1.15312e+06	87845.7
5102	CN	66.5	Female	1808.74		3356.94	98334.8	93315.3	203248	172929	1.52129e+06	87416
6145	CN	70.3	Female	1644.78		4827.1	70437.2	101464	283188	117106	998943	85515
4955	MCI	71.5	Male	3411.28		2934.82	129562	114050	178159	125802	1.24272e+06	79669.1
19	CN	73.1	Female	1055.86		4317.99	99731	101365	204413	150311	1.44059e+06	69859.7
4299	MCI	76.9	Female	4333.33		4377.72	157439	152182	186636	158492	1.30726e+06	93988.4
2168	MCI	71.3	Male	1754.81		2998.81	69040.8	94351.1	190804	83458.1	932986	67408.3
637	CN	76.1	Female	1578.6		5440.98	93578.4	135190	231464	172776	1.51804e+06	100873
177	CN	74.8	Female	3136.32		3704.94	127513	105310	188581	160331	1.61231e+06	92269.9
4131	MCI	82.4	Male	2097.56		3819.72	105141	97519.9	193634	109420	1.10666e+06	78942.1
45	MCI	86	Male	2331.08		6452.87	177956	136728	232501	164098	1.56881e+06	77923.7
514	MCI	80.8	Male			9919.08	121883	78511	101659	148060	1.21248e+06	71477.9
4780	MCI	70.3	Female			8272.06	83988.9	73527.9	100831	103699	1.23168e+06	78093
4707	DEM	68	Male			8831.87	93525.5	72884.1	81659.1	122982	1.07842e+06	64907.9
2027	MCI	62	Female			10380.5	98032.6	89693.6	119024	223978	1.91203e+06	115787
4862	MCI	77.4	Male			10939.9	103740	93068.3	92056.5	183135	1.38738e+06	94171.1
5110	CN	68.8	Female			9437.94	98492.8	113684	123177	275969	1.69208e+06	99015
429	MCI	62.8	Male			9283.82	84561.9	84032.5	104599	133175	1.27309e+06	103566
4715	MCI	56.7	Female			18848.1	129401	81569.9	131875	265530	1.67171e+06	151350
4276	CN	73.9	Female			6919.69	91149.9	76729.6	106244	124453	1.2815e+06	81263.4
1293	MCI	77.1	Male			11012	110345	102601	98508.6	143292	1.52284e+06	88749.7
4756	DEM	84.3	Male			10862.6	105611	96446.4	101099	149577	1.39016e+06	84349.1
6065	CN	71.3	Female			9817.52	84882.3	81357.7	122512	152409	1.18173e+06	80569.5
6073	MCI	62.9	Male			18036.9	131815	78513.3	109779	195646	1.97443e+06	112960
6755	MCI	68.3	Male			8312.49	89503.5	89398.7	110908	109122	1.00149e+06	71198
6396	CN	75.3	Female			9129.02	93362.7	94309.4	93633.2	157376	1.36113e+06	106045
433	CN	85.5	Female			15583.3	119599	87418.9	95679.3	197734	1.75279e+06	100163
994	MCI	55.1	Female			13860.1	101281	85821	110030	170828	1.60567e+06	100719
4115	MCI	67.4	Male	2314.43		2215.73	70923.4	76196	116040	100762	672446	61840.5
5057	DEM	75.3	Male	5261.79		927.536	88105.8	87071.1	111029	152417	1.11169e+06	69193.8
400	DEM	69.2	Male	5772.84		4289.58	107344	81175.7	112261	141486	843504	59970
2213	MCI	82.3	Female	3251.55		2038.68	82674.9	103032	115773	156069	1.05129e+06	75668.4
4079	MCI	64.5	Female	3865.8		1535.02	74776	84081.7	142498	126540	724809	75358
352	CN	77	Female	5234.39		1763.09	90634.7	84578.3	107679	111714	768227	64704.8
4394	MCI	75.9	Female	2702.62		1218.05	93334.8	75739.9	113349	146009	775100	66603
908	MCI	62.9	Female	3423.72		1932.56	96155.9	78991.5	109967	142619	805726	66260.9
4119	CN	79.3	Male	3390.29		2931.64	92929.1	83119.7	126607	210283	951776	84052.1
4382	CN	75.9	Female	4733.29		3449.05	92238.4	91694.3	109758	173655	933683	75812.4
4184	MCI	62.4	Female	5441.92		2321.03	86953.8	73538.8	99190.8	160433	883698	69792.7
5171	CN	72.8	Female	4932.4		2594.06	108159	95424.5	107547	178801	949226	73202.7
4910	DEM	81.5	Female	4163.31		3396.49	110481	80716.1	118598	166169	935667	73341.8
6459	CN	66	Female	3363.66		2197.86	69565.9	69290.7	105330	193050	887633	75834.7
930	MCI	75	Male	11537.2		891.463	56957.2	58926	125784	88937.6	568515	60271.3
6321	CN	72.8	Male	4514.74		861.412	101613	84009.1	111658	108807	991424	70950.3
4867	DEM	74.5	Male	2712.66		2651.15	98327.2	81586	107520	130163	905097	82656.1
6147	CN	69.7	Male	4455.43	1136.01	1689.99	62176.4	108074	156345	107221	695627	82371.4
4765	MCI	76	Male	2473.35	1769.68	3947.88	65176.1	114904	161773	150019	949791	105947
4615	DEM	86.5	Male	2762.86	1447.59	2262.27	103993	117470	147109	104535	803503	96393.2
4591	DEM	65.9	Female	4657.39	1519.5	3728.03	75384.6	91162.7	155156	155880	970317	91931.7
6031	CN	67.3	Female	2921.77	1387.78	3292.67	71738.4	100070	197476	184207	1.11038e+06	99473.5
6846	MCI	77.2	Male	2734.26	2139.07	4111.07	67004	97013.7	148810	144339	1.06729e+06	98450.6
5269	CN	65	Male	16840.4	1732.68	1030.28	45355.4	87009.9	113895	84724.4	639737	72405.1
4871	MCI	66.5	Female	4915.8	1683.17	1718.48	63985.8	103087	159334	232891	1.47323e+06	104898
4429	CN	77	Male	3802.17	761.811	3180.3	56307.6	92283.1	152827	156789	769955	100397
6033	MCI	57.9	Female	4094.92	2245.31	3416.81	71117.6	121353	178565	194055	1.2781e+06	94983
1046	MCI	71.6	Male	3088.23	1698.3	2491.29	97641.5	120828	136247	148232	961544	101047
4936	MCI	78.1	Male	2850.83	1035.32	1552.91	51900.9	98815.7	127558	106353	711844	63930
2390	MCI	87.8	Female	3597.71	1598.41	4533.45	88986.7	121541	173303	160842	968108	119678
6277	CN	70.8	Female	3133.69	1234.08	2499.6	80471.7	104334	169922	133470	948852	103931
792	MCI	73.5	Male	8545.41	1688.57	2197.46	50404.6	98283.2	140232	130734	927522	83685.6
4905	DEM	72.8	Female	5777.35	1870.51	4095.8	73361.6	132487	157397	138496	868639	81687.5
4218	CN	80.7	Male	3003.24	1011.24	3294.25	74137.2	94107.5	152029	150452	704269	81409.2
4278	CN	75.1	Male			7209.95	105221	59538.3	135820	93824.8	1.03122e+06	68907.6
4270	CN	74.7	Female			9101.31	141923	83554.9	132246	163352	1.23246e+06	94216.2
4225	CN	69.9	Male			10790.4	120267	73586.9	133003	106081	839925	77485.9
6288	CN	72.6	Female			9208.79	144150	86519.8	174198	164451	1.16247e+06	98970.3
4982	DEM	58.3	Female			9947.54	126325	66397.4	133925	122048	913269	92599.5
321	DEM	68.4	Male			10606.1	103437	83860.9	155330	114538	1.01652e+06	82015
4746	MCI	71.2	Female			5963.83	104119	64374.5	116134	86259.1	842857	80347.4
4636	MCI	77.1	Female			11743.6	102481	79576.5	150103	136577	1.19619e+06	99611
821	MCI	79.2	Male			8935.47	115600	70674.8	150481	87174.6	790605	80790
5000	MCI	76.7	Male			8750.73	134785	85405	138770	98034.2	809134	80387.1
426	DEM	79.7	Male			6486.08	111015	65501.3	129726	76683	579937	63706.3
4196	CN	78.5	Male			10775	113538	68485.5	159635	128583	728262	100209
2238	MCI	68.5	Male			7316.89	95527.6	61362.3	160523	102699	757990	77985.1
1190	CN	76.5	Female			13460.9	179885	85040.2	156848	133645	999913	99887.6
4507	MCI	78.2	Male			10182.6	128883	57814.3	149686	113807	864903	97237.7
4536	MCI	77.9	Female			8168.97	109787	44505.5	145195	72954.1	718625	76159.7
6524	CN	66.5	Female			6352.48	89537.3	63814.8	145143	89578.4	784970	58511.6
921	MCI	71.4	Male	1847.93		9176.23	69400.6	89172	151844	96387.9	811256	132089
6146	CN	65.5	Female	1430.16		8897.95	108681	95673.9	181937	138779	1.09018e+06	155096
552	MCI	60.2	Female	3087.15		9984.86	98077.6	97377.1	163144	138472	1.2819e+06	168840
677	CN	70.9	Male	1232.16		7790.74	111048	73666.7	147672	148986	1.0359e+06	153383
4732	DEM	77.3	Male	2069.24		6885.24	136950	99753.2	153471	109973	878411	140953
2391	MCI	71.8	Female	2152.1		9089.55	103403	79814.5	125007	135746	1.24099e+06	99147.1
4869	MCI	77.3	Male	4462.01		9095.2	70556.3	84164.8	154856	129806	1.10491e+06	156134
2146	MCI	66.4	Male	1174.44		8202.47	95998.7	110390	190857	183653	1.21686e+06	161164
4420	MCI	81.4	Male	3212.39		6659.18	73167.2	85180.3	172782	77964.5	682294	125266
6168	CN	76	Female	1621.6		7073.49	90288	88049.2	161312	89352.4	1.07714e+06	142298
748	MCI	79.6	Male	1845.95		6832.11	80696.6	78986.9	159251	92092	889567	123435
76	DEM	78.4	Male	2047.46		8949.72	171164	101478	169644	121825	1.09419e+06	160641
6330	CN	70.3	Male	2257.2		10162.1	119449	114416	186274	122682	1.03565e+06	144151
4039	DEM	55.9	Male	1743.92		11469.3	127984	93372.9	150487	101039	1.29884e+06	146828
4857	MCI	68.4	Male	2522.83		7785.29	82375	82106.6	172000	76142.8	733723	144565
4102	MCI	66.9	Female	1435.24		8800.87	132935	89057.2	143670	130533	1.14121e+06	145393
2083	MCI	88.3	Female	1863.03		8279.31	161166	106248	150426	127505	1.40256e+06	108213
906	MCI	65.3	Female			13264.4	70137.1	104630	160045	198980	1.21846e+06	91154.4
2164	MCI	70.9	Female			8154.34	52128	79241.5	163488	131570	1.02109e+06	68879
5147	CN	76.5	Male			10148.1	61202.1	96911.3	141255	163287	874806	82034.8
1341	DEM	71.6	Female			15490.5	57818.7	80753.8	158523	137844	1.18725e+06	82467.1
4545	CN	67	Female			6601.67	70837	110074	157899	164454	1.36124e+06	83012.4
4302	MCI	76.1	Male			9135.57	61704.6	78229.2	154003	113028	982711	86433.3
4612	CN	68.5	Female			7880.76	52752.9	84988.1	177596	157041	1.2527e+06	83351.1
6503	MCI	75.9	Male			12868.4	66778.8	85693.7	187188	166713	1.1616e+06	100167
1276	CN	71.8	Female			3377.4	42356.6	78112.9	140809	71448.1	798533	48115.1
555	CN	76.6	Male			9000.35	85444.8	86872.7	165607	105650	900908	80058.6
4206	MCI	68.6	Male			8829.68	68967.6	100142	164373	169545	1.07715e+06	79281.7
519	CN	74.1	Male			8193.48	64421.3	91676.9	179983	116796	840076	75604.2
4799	MCI	68	Male			8942.87	57946.6	94559.2	169576	119268	1.02885e+06	82804.6
6810	DEM	73.2	Male			7719.75	60797.7	78026.4	167276	110196	952128	77175.7
6085	CN	55.8	Female			9460.9	61709.5	103884	159826	150181	1.22128e+06	69128.9
2106	MCI	77.5	Male			12004.5	54468.5	76885.6	163423	146837	1.1238e+06	78265.7
4992	DEM	63.8	Female			7942.61	59650	84190.1	174960	123393	1.04719e+06	89416.9
443	MCI	63.1	Male	1466.84		4372.98	70808	56462.2	155588	89509.8	831476	102878
896	CN	76.9	Male	2233.48		7050.46	115662	71635	142408	144158	1.26538e+06	110765
6354	CN	70.8	Female	3442.16		4711.44	115286	74911.3	129395	135310	1.13855e+06	138930
1062	DEM	82	Male	1491.97		5718.25	122110	70289	135057	118761	985620	114666
4641	DEM	73.6	Female	2586.73		6089.64	151044	71671.3	120146	148468	1.56413e+06	139840
4275	CN	72.8	Male	2728.88		5268.5	109648	71352.8	140906	93878.1	915328	95980
6142	DEM	86.1	Female	984.078		8199.18	139870	70051.9	149403	94698.9	1.00419e+06	138172
1168	MCI	81.2	Female	3116.61		7462.59	97042.3	74482.6	131561	133814	1.03779e+06	130783
4742	MCI	70.6	Female	2465.61		2054.1	99175.1	62163.2	118750	96636.9	1.00657e+06	85667.6
4858	MCI	55	Male	1143.54		6188.2	98252	80093.8	152849	114044	1.06355e+06	136659
4951	CN	71.9	Female	1195.53		2300.84	75491.9	55868.2	127255	80810.2	939660	99121.6
4782	MCI	72	Male	2316.89		4182.68	95091.7	52218.2	129913	102951	998227	95997.5
422	MCI	61.6	Male	2315.97		5355.04	102577	68057.4	150182	136643	1.18594e+06	120482
4359	MCI	76.7	Male	2184.09		5428.57	125789	78988.1	142436	130858	1.12202e+06	116845
4500	DEM	90.3	Female	2750.34		6638.58	118637	67835.8	126488	150298	1.18702e+06	102358
672	CN	62.1	Female	1065.86		6270.75	93470.3	65822.2	131338	93118.9	2.46513e+06	109930
4096	MCI	84.5	Male	806.471		4343.13	113532	57948	136498	86311.2	1.02236e+06	108163
4480	MCI	63.8	Female	2450.8		1632.29	84157.6	72335.5	62424.4	161138	1.14406e+06	96660.2
579	MCI	65.5	Female	1979.23		2783.08	84681.1	72476.9	65870.4	134019	977165	95043.1
4654	MCI	75.5	Female	2019.27		2544.26	82899.4	107068	66983.2	178493	1.17976e+06	101413
4580	CN	69.7	Female	1848.76		1844.61	76185.8	79560.3	57686.4	126047	960537	88817.4
204	MCI	71.2	Female	3489.75		2251.44	99862	92118.6	69418.4	167512	1.20208e+06	80702.4
4538	MCI	78.9	Female	1713.49		1873.68	80284.4	116948	62137.1	215742	1.4401e+06	97464.2
836	DEM	83.2	Male	2275.9		2244.88	83890.2	86044.8	63433.5	163930	914790	116591
4001	DEM	88.5	Female	2363.37		2039.32	102619	120563	64436.7	221407	1.58647e+06	123671
4175	MCI	75.5	Male	1225		1629.83	118738	81948.2	50516.7	130844	917032	87836.6
6061	CN	74	Female	866.35		1259.07	76938.3	72433.6	60439.4	123299	1.09172e+06	101399
4093	CN	70.1	Female	1204.13		534.734	69357.8	74477.2	57614.2	128122	809125	46557
5029	DEM	79.6	Male	1338.58		1118.9	88491.7	86845.9	68346.1	129988	990198	86592.8
4521	MCI	70.1	Male	360.418		2660.99	76710.7	70495.4	56505.8	113338	714680	67116.3
6072	DEM	89.2	Female	377.905		1690.68	83364.3	97727.9	62206.1	149007	1.24993e+06	60092.8
6243	MCI	66.9	Male	527.301		1361.46	72038.1	79780.8	61180.6	125787	867725	151774
431	DEM	84.1	Male	901.746		2612.33	81651.6	79068	66709.1	124475	1.18005e+06	125623
6310	CN	67.2	Female	1266.49		1845.63	88723.9	106783	58997.2	167955	1.20465e+06	95284.5
2026	MCI	82.5	Female	541.966	1642.95	11160.5	69489.7	132427	132574	191403	1.30919e+06	105367
89	CN	65.1	Male	915.752	505.911	7783.82	25988.5	75014.7	104390	95192.3	696659	57986.2
598	MCI	72.3	Male	1654.48	1437.13	10187.1	41539.2	117500	116345	182709	1.09424e+06	73253.7
4488	CN	72.7	Male	901.876	1541.35	10972.6	40345.8	108486	133783	245841	961057	94238.5
6067	CN	63.1	Female	1719.7	839.312	11278.3	49953.2	98157.4	112529	226029	1.07485e+06	83488.8
4802	DEM	83.2	Male	962.855	1522.71	13026.7	53621.2	87685.5	115921	189039	2.11753e+06	89757.2
886	CN	71.3	Female	739.696	731.409	10344.6	52242.5	104599	123318	586642	1.27002e+06	91077.6
4562	MCI	63.6	Male	1665.96	1337.56	14611	45846.8	123522	120155	248976	1.38386e+06	84692.5
6005	CN	67.5	Female	485.958	1928.5	8579.9	51620.1	111163	138242	250052	1.12128e+06	108267
2407	MCI	68	Female	1324.88	658.426	11639.8	46020.6	119183	129197	321372	1.55449e+06	92268.6
1187	MCI	76.4	Male	899.09	1272.3	12941.5	40364.2	117297	132957	239827	1.03548e+06	112558
1206	CN	72.9	Male	681.971	1211.23	9986.19	42832.5	95671.5	136108	181439	836504	76129.7
4757	MCI	63.1	Female	861.504	1131.19	21477.6	53198.6	101525	154202	264205	1.10403e+06	117126
4243	MCI	79.4	Male	631.728	651.937	14426	46869.1	95166.9	131298	180126	847209	83501.8
6369	MCI	76.9	Male	1110.97	1364.56	14166.7	40706.8	82947.6	139180	179139	1.06751e+06	93016.6
4179	CN	83	Male	869.017	882.491	11085.7	51152.6	81212.3	110429	184777	964895	68038.6
4042	MCI	57.2	Male	648.729	1197.09	13464.6	39941.3	92377.4	118412	185858	1.16667e+06	82700.8
394	MCI	84	Female			5144.65	44915.5	73442.7	55460.1	68491.5	1.12632e+06	85304.1
4475	MCI	84	Male			5561.94	51736.7	47837.9	62123.3	80816.1	1.14679e+06	91981
4063	MCI	59.2	Female			3286.42	31960.1	56889.3	63356.5	75351.2	1.16809e+06	83525.3
4553	MCI	68.5	Female			6581.04	43106	64927	72978.3	133058	1.30911e+06	91397.3
634	MCI	82.2	Male			2058.78	37254.6	59595.5	54716.3	69422.5	1.02218e+06	68827.4
449	MCI	66.5	Female			5829.95	33606.6	56318.4	61473.3	73492.7	1.15876e+06	80918.7
286	DEM	65.9	Male			4509.76	50639.3	57148.8	68374.4	74715.7	983121	76573.9
4941	MCI	60.2	Male			2321.95	34006.7	51392.9	52387.4	45757.2	902929	54874.6
4845	DEM	68	Female			6844.11	43360.5	66904.9	60371.1	66280.1	918687	71002.1
625	MCI	75.9	Male			1931.29	29770	48061.6	53649.1	28729.8	871710	42600.6
4680	MCI	63.4	Female			5239.12	52666	56842.8	58702.9	80069.5	1.40993e+06	70632.8
410	MCI	61.3	Female			4441.25	28889.3	62162.8	70671.5	92644.5	978097	74140.2
6260	CN	69.1	Male			3163.65	43697	58164.4	65203.4	72621.9	1.19211e+06	73697.4
4823	MCI	82.2	Male			2613.72	42949.1	54335.3	56967.8	68975.8	890250	76792.1
4644	CN	67.7	Female			3606.08	39160.2	54993.5	56598.9	73890	1.02606e+06	72841.1
2142	MCI	82.7	Female			5191.31	39861	62424	52267	93762.5	957340	68475.2
4516	CN	71.4	Male			4032.59	40643.1	61524.4	60234.1	85458	1.35526e+06	76043.4
6345	MCI	79.3	Male	4601.49	3046.13	22989.9	153682	75539.3	138180	88145.8	1.14103e+06	154340
880	MCI	84.3	Male	2307.55	3750.94	8878.3	145368	59953.7	108433	53135.4	1.01528e+06	77817.4
5236	CN	85.4	Male	6559.65	3690.19	12572.4	145190	70607.3	124465	59402.9	870779	94616.3
4133	MCI	79.8	Male	4456.02	2764.74	7841.19	178437	77749.3	131314	95168.3	1.31915e+06	118254
2264	MCI	69.4	Male	10143.3	3636.65	7741.54	112302	79049	107106	36083	652607	83838.7
2100	MCI	87.9	Female	5492.95	7613.79	12651.8	185106	78845.2	121601	96845.9	1.0776e+06	126125
120	CN	72.1	Male	4319.58	3952.88	6449.49	122251	72625.7	108764	66846.6	1.02573e+06	94160.3
753	DEM	65.5	Male	7751.76	5408.54	11944.9	135348	68713.5	117750	45919.6	876254	86883.2
2378	MCI	59.9	Male	4855.58	3041.16	8527.55	106785	75980.5	115639	74340.3	1.05957e+06	84925.6
850	DEM	78.1	Male	2463.62	4353.15	10987.4	124620	58482.4	126067	66528.4	868242	84971.6
4543	MCI	70.2	Female	7010.53	3548.92	10206.8	105977	84607.8	130288	95485.5	1.00457e+06	105689
1246	MCI	72.4	Male	5059.24	3710.54	14332.5	138416	83729.5	142271	103875	1.04235e+06	102723
4094	MCI	60.1	Female	4711.23	5086.46	8210.35	112059	70045.6	111445	84274	1.02283e+06	95969.5
4414	MCI	60.8	Female	3986.49	5067.77	11232.9	115623	64335.2	114663	73883.2	1.05345e+06	93245.1
467	CN	81.1	Female	3882.65	3707.11	12646.3	139063	96303.2	118539	69981.6	1.00955e+06	108778
501	MCI	78	Male	3527.58	6153.47	13433.1	132164	63440	120725	84096	916064	100831
5290	CN	67.1	Female	6750.82	5309.87	12430.1	111872	78519.3	136754	93540	1.14953e+06	117517
16	CN	65.5	Male			5517.47	99978.1	65383.9	178660	250978	1.61874e+06	91387.4
6291	MCI	72.3	Male			2744.78	80685.2	50033.3	191865	132639	1.08556e+06	65640.8
4169	MCI	62	Female			5217.18	52503.9	63729.3	196426	223444	1.18351e+06	86723.5
59	CN	70.9	Female			4962.42	97628.2	64093.4	201567	240983	1.56386e+06	113389
5047	MCI	68.9	Female			6828.16	96926.2	67095.9	234120	264660	1.18676e+06	93539.7
4419	MCI	63.8	Female			3261.27	80790.5	54050.7	274956	142477	1.03301e+06	77929.1
5075	CN	83	Female			4550.77	77841.2	69725	184226	278159	1.29595e+06	92543.3
4395	MCI	72.4	Female			3384.82	87161.9	62521.6	204200	214564	1.58888e+06	72911.3
5005	DEM	78.1	Male			4508.99	95826.8	83596.5	148868	226410	1.60295e+06	96056
4021	CN	66.6	Male			3563.19	84016	56968.1	157839	192593	1.35774e+06	85454.7
362	MCI	70.5	Female			10661.1	80666	62652.5	196940	250789	1.59322e+06	102158
61	CN	77.1	Female			4018.3	96827.8	63611	193457	269343	1.44489e+06	89134.3
4878	CN	72.9	Female			4165.27	72613.2	55227	141521	210255	1.32417e+06	82680.9
6063	CN	74.1	Female			4158.57	102098	68357.6	202848	226340	1.45679e+06	87898.2
950	MCI	73.6	Male			4427.61	67831.1	55939.1	188329	190159	1.17663e+06	88636.4
6796	DEM	71.7	Male			6075.28	140608	77298	197767	208973	1.21873e+06	104883
4277	CN	71.4	Female			4517.3	68059	65107.1	169244	222920	1.55063e+06	88568.2
5199	CN	66.9	Female		3381.02	10243.8	74998.6	67725.8	138694	125255	1.46206e+06	145549
2200	MCI	76	Female		3626.25	4956.6	77517.8	50991.1	147337	148968	1.7042e+06	152728
4287	MCI	70.9	Female		3828.63	11910.5	103941	71715.6	168319	152320	1.55789e+06	162109
56	CN	69.7	Female		4623.52	4899.86	64166.6	45824.7	207367	136064	1.45672e+06	148255
4877	MCI	84.5	Male		4062.56	9607.43	84037.1	48240.6	160475	158310	917821	166451
4921	CN	66.8	Male		2717.31	4447.01	93672.5	39548.6	169377	99328.1	1.04697e+06	150789
4855	CN	83.9	Male		3221.03	8895	85412.2	54434.5	160476	104896	1.38412e+06	174112
5280	CN	67.5	Male		2961.12	4237.8	70755	52377.5	159323	86726.7	1.09946e+06	121147
23	CN	71.8	Male		4623.23	6642.02	77512.1	59507.4	155467	180090	1.95353e+06	181472
5037	DEM	67.4	Male		1828.96	5875.48	74733.3	32924.4	135402	86122.3	1.15041e+06	118253
912	MCI	73.9	Female		3298	8026.32	82540.9	55452.6	158703	155243	1.26987e+06	166003
1063	CN	78.4	Female		4707.5	5666.22	85453.2	71157.5	144971	174251	1.69257e+06	153851
6621	CN	57.5	Female		2341.11	6189.24	52550	55563.1	174228	118264	1.49134e+06	143352
6629	CN	57	Female		4025.27	5227.96	120009	85059.1	179763	165924	2.1354e+06	167480
5015	DEM	77.9	Female		3384.95	8951.77	102399	65182.8	148025	145546	1.50245e+06	174304
1250	CN	73.2	Female		3012.22	4137.91	54367.4	63161.3	194666	181996	1.46945e+06	149015
5040	CN	76	Female		3598.17	6633.54	63081.4	55949.3	164058	140595	1.45245e+06	173575

## Sheet: Fig6_data
Figure 6. CSF TFRC across diagnosis (A) and TFRC–Tau cross-platform concordance (B)
Panel A: CSF TFRC abundance across diagnosis (ADNI Emory, n = 1,105)
Statistic	Value
TFRC % change (age/sex-adjusted, DEM vs CN)	-4.7%
ANCOVA p (across CN/MCI/DEM)	0.068
Panel B: TFRC ↔ Elecsys total-Tau concordance by platform
Platform	Spearman ρ	p	n
TMT-MS	+0.08	0.006	1,102
SomaScan (independent)	-0.44	1.3e-28	579

## Sheet: SuppFig1_data
Supplemental Figure 1 (A-E). Comprehensive gene catalog + iron/ragulator
Panel A: 29-gene comprehensive % change
Gene	Early mean	Late mean	% Change
SLC16A3	0.0633	0.036	-43.2
HK2	0.0726	0.047	-35.23
LDHA	0.1053	0.0834	-20.83
PDK1	0.1285	0.1073	-16.51
SLC16A1	0.0645	0.0573	-11.13
SLC2A1	0.1301	0.1204	-7.44
PKM	0.5521	0.5019	-9.09
PFKFB3	1.037	0.9831	-5.2
TFRC	0.2757	0.2441	-11.48
FTH1	1.5527	1.2544	-19.21
FTL	0.9129	0.7688	-15.78
CP	0.1673	0.0926	-44.68
LAMP1	0.2222	0.2302	3.6
LAMP2	0.4396	0.4554	3.58
CTSB	0.1533	0.1692	10.38
CTSD	0.2937	0.3367	14.65
LIPA	0.1971	0.2203	11.74
ATP6V1A	0.3884	0.3937	1.35
ATP6V1B2	0.1237	0.1175	-4.96
ATP6V0A1	0.5029	0.5058	0.57
ATP6V0D1	0.1102	0.1105	0.33
ATP6V1C1	0.3048	0.3041	-0.22
SLC9A6	0.158	0.1773	12.17
MTOR	0.3837	0.3882	1.16
SOX9	0.5617	0.5869	4.48
STAT3	0.7765	0.8078	4.03
LCN2	0	0	#NUM!
PTGDS	1.8725	1.843	-1.58
SLC40A1	0.0262	0.0254	-3
Panels B-E: bin-level mean expression (iron, ragulator, pH-regulatory)
bin	CP	FTH1	FTL	TFRC	SLC9A6	PTGDS	LAMTOR1	LAMTOR2	LAMTOR3	LAMTOR4	LAMTOR5
0.2	0.197	1.4483	0.8336	0.2985	0.1584	1.8782	0.0996	0.0404	0.0593	0.0811	0.0665
0.3	0.1065	1.5512	0.8875	0.2092	0.1547	1.8763	0.1011	0.0393	0.0671	0.0809	0.0604
0.4	0.1984	1.6586	1.0175	0.3195	0.161	1.8631	0.0988	0.0418	0.0604	0.0935	0.0687
0.5	0.1114	1.2342	0.749	0.3061	0.1536	1.902	0.0939	0.0325	0.0578	0.0751	0.0478
0.6	0.0795	1.3712	0.6752	0.2752	0.1852	2.0219	0.0811	0.0368	0.0635	0.0828	0.0572
0.7	0.0999	1.2137	0.8719	0.2369	0.1738	1.7585	0.0864	0.0312	0.0628	0.0753	0.0599
0.8	0.0982	1.1784	0.7593	0.2202	0.1728	1.7485	0.0909	0.0319	0.0684	0.0773	0.0593
0.9	0.2361	0.691	0.5788	0.2031	0.1562	1.5134	0.0671	0.0268	0.0527	0.0804	0.0474

## Sheet: SuppFig2_data
Supplemental Figure 2 (A-C). Temporal ordering of the metabolic cascade
Panel A: Event timeline (HMOX1 event removed — detection artifact)
Event	Onset Bin	Category
MCT4 decline onset (10%)	0.3	Energy
LMR decline onset	0.4	Lysosomal
Iron co-decline	0.5	Iron
PTGDS/EAAT2/ATP1A2 compensatory peak	0.6	Checkpoint
PTGDS collapse	0.7	Checkpoint
Panel B: Lysosomal Metabolic Reserve (LMR) composite trajectory (normalized Bin 0.2 = 1.0)
34-gene module = V_ATPase(10)+Lysosomal(8)+Autophagy(6)+Ragulator_mTOR(9)+pH_regulatory(1); rowMeans normalized to Bin 0.2; computed from Astrocyte_179_genes sheet. Trough at Bin 0.5 (LMR decline precedes iron co-decline by one bin).
bin	LMR_norm
0.2	1
0.3	1.0073
0.4	0.9876
0.5	0.9697
0.6	0.996
0.7	1.0135
0.8	1.0178
0.9	0.9941
Panel C: Metabolic overload — normalized to Bin 0.2 = 1.0 (detection-gated; det_rate shown)
Astrocyte: EAAT2 (SLC1A2), ATP1A2, PTGDS, MCT4 (SLC16A3). Neuron: MCT2 (SLC16A7). Source: SuppFig2C_extract.R; SLC16A3 anchor matches Astrocyte_179_genes at all 9 bins.
Series	det_rate	B0.2	B0.3	B0.4	B0.5	B0.6	B0.7	B0.8	B0.9
EAAT2 (SLC1A2), astro	0.99	1	1.0355	1.0301	1.0648	1.0982	1.0403	1.0831	0.9798
ATP1A2 (Na/K pump), astro	0.968	1	1.0233	1.0447	1.0137	1.1299	1.0219	1.0132	0.9698
PTGDS, astro	0.937	1	0.999	0.992	1.0127	1.0765	0.9363	0.931	0.8058
MCT4 (SLC16A3), astro	0.061	1	1.143	1.3107	0.7332	0.6121	0.7426	0.6071	0.4001
MCT2 neuron (SLC16A7), neuron	0.751	1	1.0038	0.9656	1.0316	1.0162	1.0144	1.0106	0.9855
Donor-level MCT4 vs neuronal V-ATPase (n = 84) — shown in Figure 2C (CPS-adjusted partial r = +0.466)
mean_cps	MCT4	VATpase
0.302313	0.0327789	0.372049
0.522889	0.0202005	0.312749
0.206549	0.0474884	0.29283
0.725006	0.0355729	0.355275
0.760781	0.00678372	0.283
0.753888	0.0212423	0.236463
0.810865	0.0314266	0.365565
0.23701	0.00831474	0.311157
0.84721	0.0206537	0.359161
0.678277	0.0382189	0.373166
0.878968	0.0266049	0.306505
0.616531	0.0198874	0.315002
0.790026	0.0149941	0.305156
0.896074	0.00766186	0.30974
0.728161	0.025555	0.342773
0.928513	0.0113965	0.290306
0.323639	0.0681802	0.418837
0.588882	0.0202196	0.322556
0.906843	0.0242115	0.37496
0.625951	0.0256387	0.420687
0.814934	0.00915109	0.260781
0.612832	0.0221848	0.308245
0.786515	0.0444495	0.47433
0.777859	0.0372442	0.36691
0.818041	0.0628062	0.408169
0.874938	0.0052704	0.329713
0.36833	0.0914675	0.440055
0.204485	0.0182218	0.37549
0.844305	0.0049778	0.268078
0.891215	0.00215898	0.309731
0.748876	0.00670999	0.22888
0.371467	0.0524824	0.322428
0.438827	0.0501103	0.307497
0.652943	0.0411272	0.380022
0.442128	0.0405092	0.402351
0.355632	0.0273573	0.410224
0.922354	0.0175993	0.363774
0.868383	0.0126308	0.373962
0.149616	0.116333	0.441576
0.856821	0.027916	0.382915
0.238033	0.0254341	0.410429
0.261645	0.0461803	0.38464
0.575735	0.0286466	0.321939
0.838096	0.0283227	0.322917
0.723364	0.0469426	0.40801
0.790347	0.0123551	0.306029
0.911019	0.0170322	0.375318
0.821793	0.0241209	0.361054
0.170619	0.0566145	0.333281
0.486297	0.0289062	0.341956
0.889563	0.0134959	0.336777
0.754185	0.054478	0.424878
0.230781	0.0763209	0.440716
0.336173	0.0139004	0.336383
0.680216	0.0131797	0.28208
0.643946	0.0310543	0.321532
0.517476	0.0153128	0.36878
0.911077	0.00778383	0.275307
0.704997	0.0134055	0.319005
0.739924	0.0237436	0.373048
0.296555	0.0573564	0.34327
0.518005	0.0589315	0.318743
0.749599	0.0428839	0.348978
0.687187	0.0600449	0.385288
0.300177	0.0747295	0.306087
0.910112	0.037342	0.356031
0.252443	0.0330959	0.407719
0.834627	0.075595	0.382278
0.380411	0.0577084	0.396486
0.899912	0.0208075	0.291001
0.869521	0.0230077	0.3325
0.37697	0.0623376	0.36532
0.690041	0.0184952	0.346134
0.180319	0.055199	0.437531
0.18237	0.0615729	0.328203
0.729332	0.00977974	0.343192
0.744518	0.0244242	0.388418
0.303751	0.0381801	0.358129
0.850065	0.0376001	0.372396
0.520347	0.0528692	0.45081
0.844798	0.00486225	0.331662
0.924065	0.0106749	0.39561
0.765704	0.0529206	0.319009
0.224783	0.117358	0.411133

## Sheet: Stats_Summary
Summary of all reported correlation coefficients, p-values, and sample sizes
Statistic	Value	p_value	n
MCT4 % change (astrocytes)	-43.2%	—	67,419 cells
ANLS composite % change	-29.5%	—	67,419 cells
V-ATPase % change (astrocytes)	-0.8%	—	67,419 cells
V-ATPase % change (neurons)	-5.4%	—	671,689 cells
ANLS slope β	-0.295	0.016	8 bins
V-ATPase slope β	-0.044	0.244	8 bins
MCT4 slope β	-1.036	0.0109	8 bins
Δslope (MCT4 vs V-ATPase) z	-3.46	—	8 bins
Δslope p-value	0.0005	—	8 bins
Bin-level MCT4 → Neuron V-ATPase r	+0.899	0.002	8 bins
Bin-level MCT4 → Neuron V-ATPase partial r (CPS-adj)	+0.855	0.007	8 bins
Donor-level MCT4 → V-ATPase r (n=84)	+0.533	1.9e-07	84 donors
Donor-level MCT4 → V-ATPase partial r (CPS-adj)	+0.466	8.0e-06	84 donors
Energy/Demand ratio change	-5.9%	—	8 bins
CSF V-ATPase V1A KW p (across CN/MCI/DEM)	0.999	—	1,105
CSF V1A ↔ MAPT Spearman ρ (raw Pearson +0.86, leverage-driven)	+0.25	4.7e-18	1,170
CSF V1A ↔ MAPT partial ρ | GFAP	+0.05	0.091	1,170
CSF V1A ↔ MAPT partial ρ | GFAP+TREM2+NfL	-0.06	0.053	1,170
CSF V1A ↔ Elecsys total-Tau (immunoassay)	+0.03	0.265	1,102
CSF HK1 ↔ MAPT Spearman ρ (glycolysis–Tau)	+0.52	7.5e-81	1,170
CSF HK1 ↔ MAPT partial ρ | GFAP	+0.42	4.7e-51	1,170
CSF HK1 ↔ MAPT partial ρ | GFAP+V1A	+0.42	7.3e-51	1,170
CSF HK1 ↔ Elecsys total-Tau (immunoassay)	+0.18	3.1e-09	1,102
CSF HK1 ↔ Elecsys Tau, SomaScan platform (independent)	+0.31	5.5e-15	587
CSF TFRC ↔ Elecsys total-Tau (TMT)	+0.08	0.006	1,102
CSF TFRC ↔ Elecsys Tau, SomaScan platform (independent)	-0.44	1.3e-28	579
