# Supplementary material for: Astrocytic lactate shuttle disruption and the energy-starved lysosome in Alzheimer’s disease
Source: Research Square preprint supplement (doi:10.21203/rs.3.rs-10057949/v1), 2026-07-15
Supplement: Supplementary file 2 [file 594883d3a616ca0bdc33b8f4.docx]

**Supplemental Material**


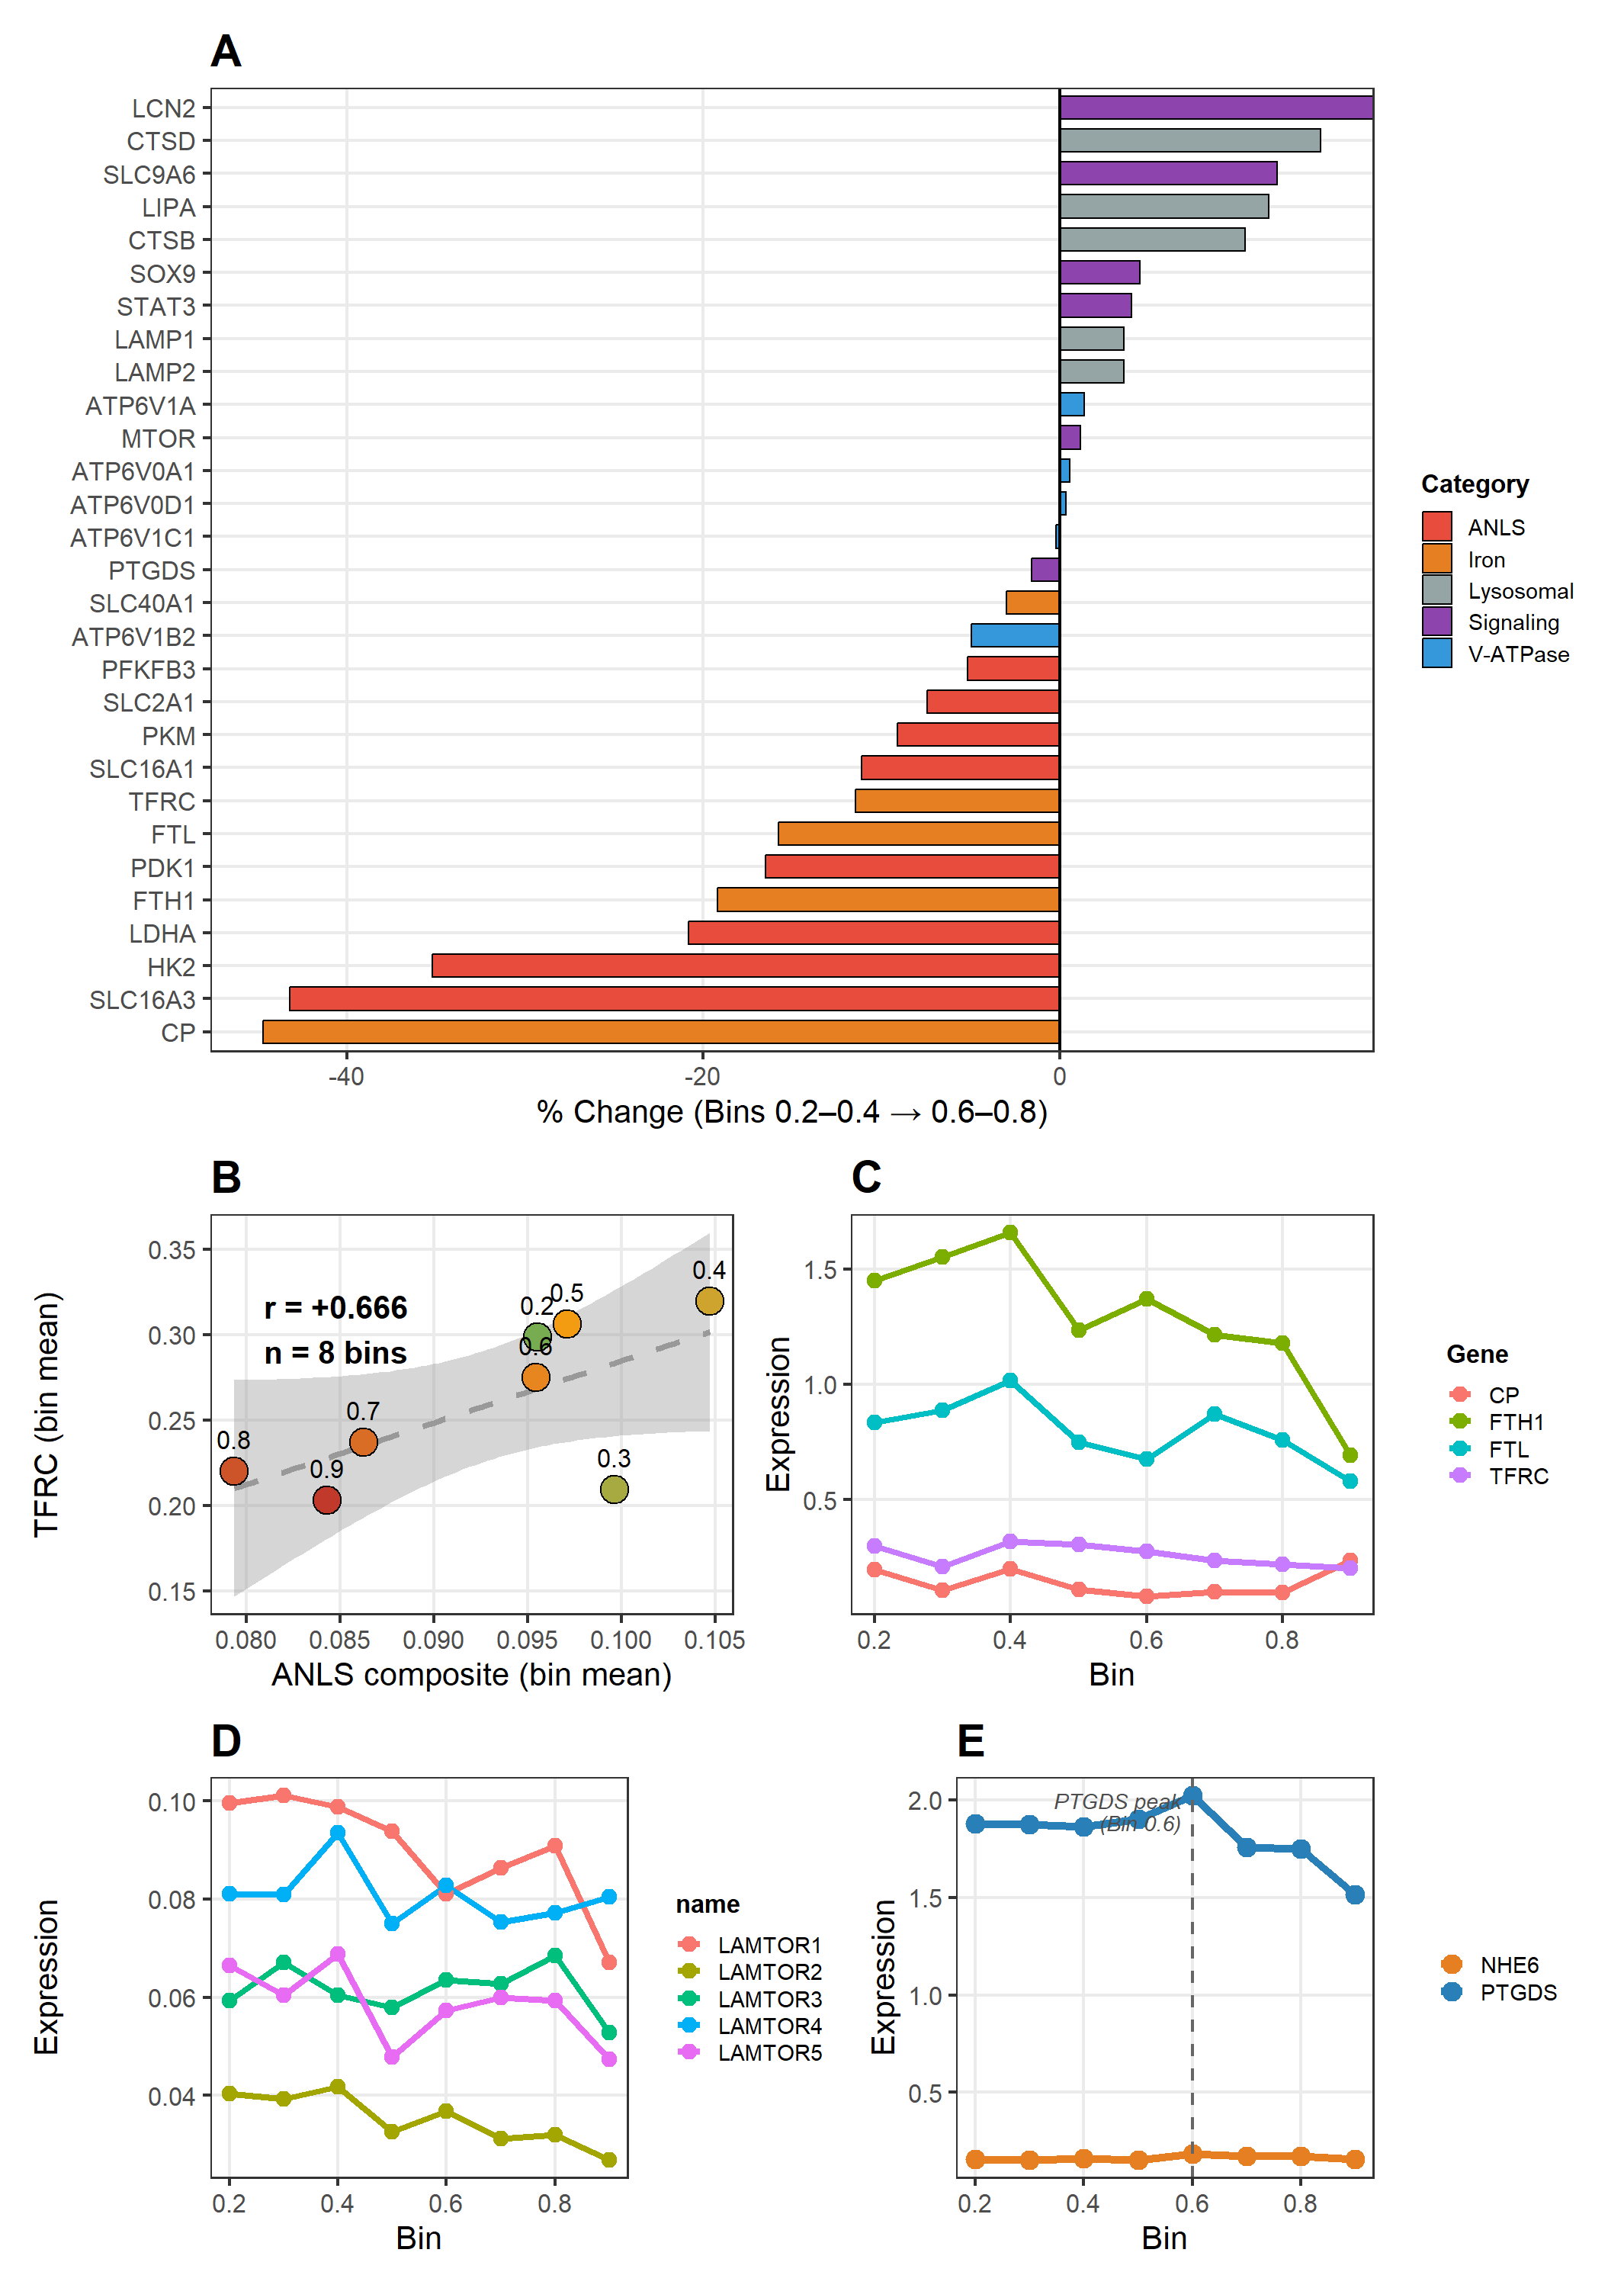


***Supplemental Figure 1 | Astrocyte transcriptomic dissociation context.******(A)*** *Comprehensive gene expression changes (Bins 0.2–0.4 to 0.6–0.8) across 29 selected key genes grouped by functional category.* ***(B)*** *TFRC–ANLS coupling at the bin level (r = +0.666).* ***(C)*** *Iron gene trajectories (TFRC, FTH1, FTL, CP) showing directionally consistent co-decline with ANLS.* ***(D)*** *Ragulator subunit trajectories (LAMTOR1, LAMTOR2, LAMTOR3, LAMTOR4, LAMTOR5) showing parallel decline.* ***(E)*** *NHE6 (SLC9A6) and PTGDS dynamics with PTGDS compensatory peak annotated at Bin 0.6.*


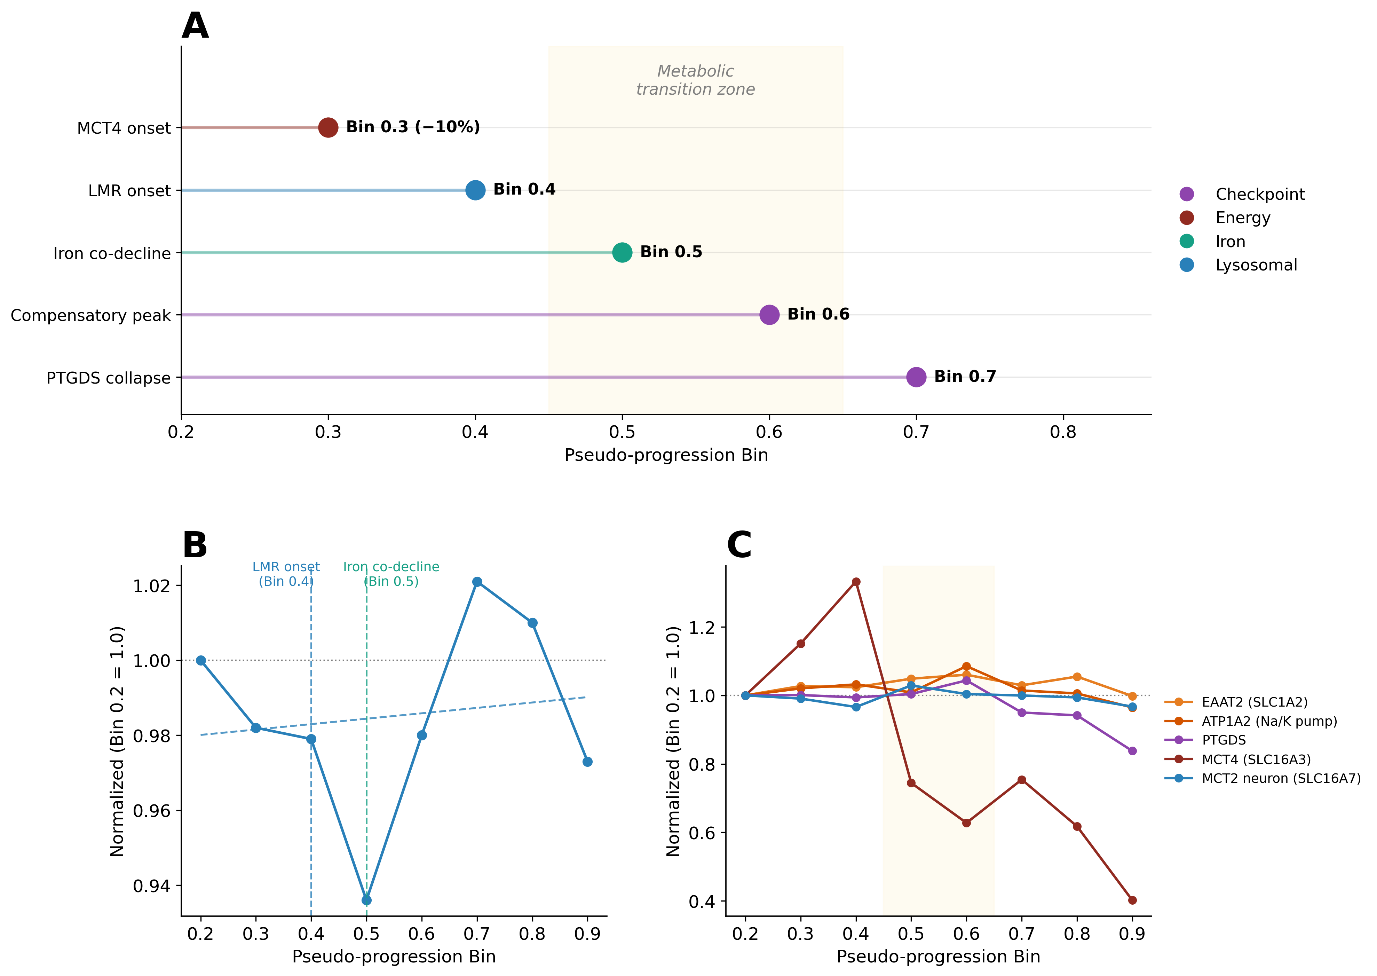


***Supplemental Figure 2 | Temporal ordering and donor-level CPS-independent coupling. (A)*** *Event timeline showing sequential ordering: MCT4 decline onset (Bin 0.3) precedes LMR decline (Bin 0.4), and iron-gene co-decline (Bin 0.5); the PTGDS/EAAT2/ATP1A2 compensatory peak (Bin 0.6) is followed by PTGDS collapse (Bin 0.7).* ***(B)*** *Lysosomal metabolic reserve (LMR) composite trajectory: decline precedes the iron-gene change-point by one pseudo-progression bin.* ***(C)*** *PTGDS, EAAT2, and ATP1A2 compensatory peak at Bin 0.6 within the metabolic transition zone (shaded), marking the metabolic overload checkpoint.*


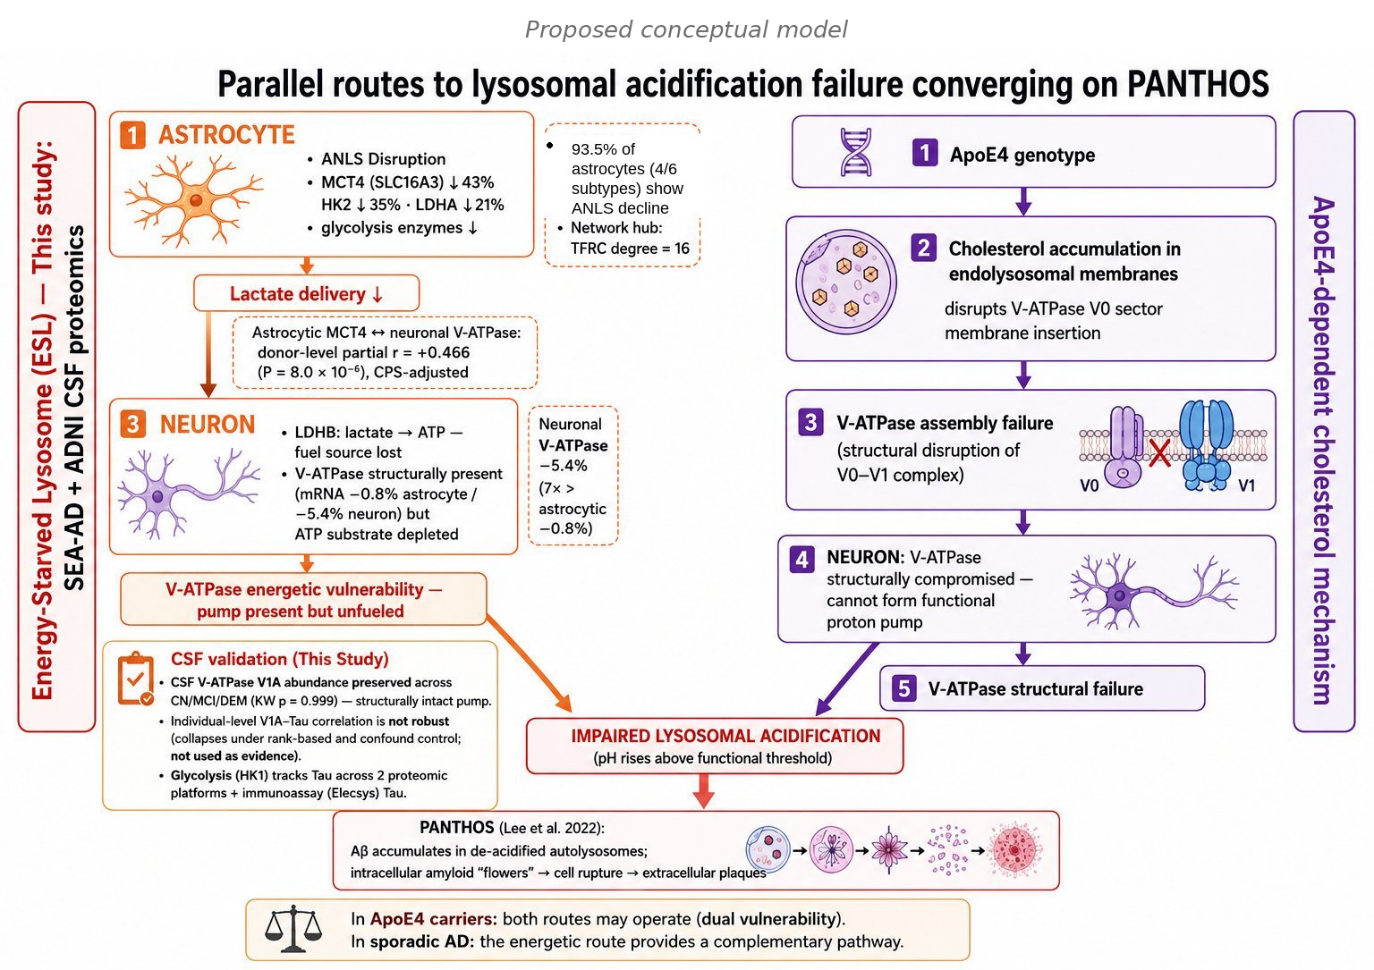


***Supplemental Figure 3 | Parallel routes to lysosomal acidification failure.*** *Left: the energetic route identified in this study — astrocytic ANLS disruption reduces lactate delivery to neurons, potentially limiting V-ATPase ATP supply despite preserved pump expression ('energy-starved lysosome'). Right: the structural route described by Lee et al. — ApoE4-dependent cholesterol accumulation disrupts V-ATPase assembly. Both routes converge on impaired lysosomal acidification and PANTHOS. In ApoE4 carriers, both mechanisms may operate simultaneously; in sporadic AD, the energetic route may provide a complementary pathway. Key statistics from this study annotated.*

**Supporting Data Values:** Astrocyte gene expression values across pseudo-progression bins for all 179 genes. These data are also provided as a separate Excel file (Supporting Data Values).

| **Gene** | **Category** | **Bins 0.2–0.4** | **Bins 0.6–0.8** | **% Change** |
| --- | --- | --- | --- | --- |
| SLC16A3 (MCT4) | ANLS | 0.0633 | 0.0360 | -43.2% |
| HK2 | ANLS | 0.0726 | 0.0470 | -35.2% |
| LDHA | ANLS | 0.1053 | 0.0834 | -20.8% |
| SLC16A1 (MCT1) | ANLS | 0.0645 | 0.0573 | -11.1% |
| SLC2A1 (GLUT1) | ANLS | 0.1301 | 0.1204 | -7.4% |
| V-ATPase (10 sub.) | V-ATPase | 0.2978 | 0.2954 | -0.8% |
| LAMP1 | Lysosomal | 0.160 | 0.166 | +3.6% |
| CTSB | Lysosomal | 0.092 | 0.102 | +10.4% |
| TFRC | Iron | 0.2757 | 0.2441 | -11.5% |
| FTH1 | Iron | 1.553 | 1.254 | -19.2% |
| CP | Iron | 0.167 | 0.093 | -44.7% |
| SLC9A6 (NHE6) | pH reg. | 0.158 | 0.177 | +12.2% |

***Note:*** *Bins 0.2–0.4 = early pseudo-progression; Bins 0.6–0.8 = late pseudo-progression. Bin 0.1 excluded due to extreme subtype dominance (Astro_6-SEAAD 54.1%, Astro_3 31.1%; combined 85.2%); sensitivity analysis including Bin 0.1 confirmed all primary findings (Supplemental Table 1). Values are mean log-normalized expression across n = 67,419 astrocytes.*

**Supplemental Table 1.** Complete partial correlation analyses and Bin 0.1 sensitivity analyses (transcriptomic) at bin and donor levels.

**Part A: Donor-level partial correlations (CPS-adjusted, n = 84)**

| **Level** | **Astro marker** | **Neuron marker** | **Zero-order r** | **p** | **Partial r (CPS-adj)** | **Partial p** | **Change (%)** | **Interpretation** |
| --- | --- | --- | --- | --- | --- | --- | --- | --- |
| Donor (n=84) | MCT4 | V-ATPase | +0.533 | 1.9×10⁻⁷ | **+0.466** | 8.0×10⁻⁶ | −12.5% | **Survives CPS** |
| Donor (n=84) | MCT4 | LAMP1 | +0.578 | 8.8×10⁻⁹ | **+0.495** | 1.7×10⁻⁶ | −14.3% | **Survives CPS** |
| Donor (n=84) | MCT4 | LDHB | +0.438 | 3.1×10⁻⁵ | **+0.407** | 1.2×10⁻⁴ | −7.1% | **Survives CPS** |
| Donor (n=84) | ANLS | V-ATPase | +0.356 | 8.9×10⁻⁴ | +0.305 | 4.8×10⁻³ | −14.3% | Attenuated |

***Note:*** *Bin-level (trajectory) correlations across nine pseudo-progression bins are CPS-confounded and reported as secondary; the primary, between-donor cross-cellular statistics (true donor-level, n = 84; MCT4-V-ATPase partial r = +0.466, MCT4-LAMP1 +0.495, MCT4-LDHB +0.407) are given in Table 1. Partial correlations regress each variable on the CPS proxy and correlate residuals. ***p < 0.001, **p < 0.01, *p < 0.05.*

**Part B: Bin 0.1 sensitivity analysis**

| **Analysis item** | **Primary (Bin 0.1 excluded, n = 8)** | **Sensitivity (Bin 0.1 included, n = 9)** | **Direction preserved?** |
| --- | --- | --- | --- |
| MCT4 slope (β) | −1.036 (p = 0.011) | −0.727 (p = 0.016) | Yes ✓ |
| V-ATPase slope (β) | −0.044 (p = 0.244, n.s.) | −0.168 (p = 0.073, n.s.) | Yes ✓ |
| Δslope MCT4 vs V-ATPase (p) | p = 0.0005 | p = 0.0217 | Yes ✓ |
| MCT4 % change (early→late) | −43.2% | −61.5%* | Consistent |
| V-ATPase % change (early→late) | −0.8% | −8.8% | Preserved |
| Bin 0.1 subtype composition | — | Astro_6-SEAAD 54.1% Astro_3 31.1% (combined 85.2%) | Leverage point confirmed |

***Note:*** *Comparison of primary analysis (Bins 0.2–0.9, n = 8) versus sensitivity analysis including Bin 0.1 (n = 9). All primary findings were directionally preserved; the donor-level cross-cellular coupling was unaffected by this exclusion. The extreme subtype dominance in Bin 0.1 (Astro_6-SEAAD 54.1%, Astro_3 31.1%; combined 85.2%) confirms the rationale for conservative exclusion in the primary analysis. * The larger MCT4 % change with Bin 0.1 included reflects inflated apparent range due to Astro_6-SEAAD dominance — precisely the leverage effect motivating exclusion. n.s. = non-significant.*
